# Supplementary material
Source: PubMed Central journal article supplement (PMC3328403)
Supplement: NIHMS314060-supplement-1.pdf [file NIHMS314060-supplement-1.pdf]

# SUPPLEMENTARY INFORMATION

## Germline mutations in *BAP1* predispose to melanocytic tumors

Thomas Wiesner<sup>1,6</sup>, Anna C. Obenauf<sup>2,7</sup>, Rajmohan Murali<sup>6</sup>, Isabella Fried<sup>1</sup>, Klaus G. Griewank<sup>6</sup>, Peter Ulz<sup>2</sup>, Christian Windpassinger<sup>2</sup>, Werner Wackernagel<sup>3</sup>, Shea Loy<sup>6</sup>, Ingrid Wolf<sup>1</sup>, Agnes Viale<sup>9</sup>, Alex E. Lash<sup>10</sup>, Mono Pirun<sup>10</sup>, Nicholas D. Socci<sup>10</sup>, Arno Rütten<sup>5</sup>, Gabriele Palmedo<sup>5</sup>, David Abramson<sup>12</sup>, Kenneth Offit<sup>7,11</sup>, Arthur Ott<sup>4</sup>, Jürgen C. Becker<sup>1</sup>, Lorenzo Cerroni<sup>1</sup>, Heinz Kutzner<sup>5</sup>, Boris C. Bastian<sup>6,8,13</sup>, Michael R. Speicher<sup>2,13</sup>

<sup>1</sup>From the Department of Dermatology, <sup>2</sup>Institute of Human Genetics, <sup>3</sup>Department of Ophthalmology, <sup>4</sup>Institute of Pathology, Medical University of Graz, Graz, Austria; <sup>5</sup>DermPath, Friedrichshafen, Germany; <sup>6</sup>Human Oncology and Pathogenesis Program, <sup>7</sup>Cancer Biology and Genetics Program, <sup>8</sup>Department of Pathology, <sup>9</sup>Genomics Core Laboratory, <sup>10</sup>Computational Biology Center, <sup>11</sup>Clinical Genetics Service, <sup>12</sup>Department of Surgery, Memorial Sloan-Kettering Cancer Center, New York. <sup>13</sup>These authors contributed equally to this work.

# List of Content

## SUPPLEMENTARY FIGURES

|                                                                                                                                                               |    |
|---------------------------------------------------------------------------------------------------------------------------------------------------------------|----|
| <b>Legends of Supplementary Figure 1-4.</b> Clinical pictures.....                                                                                            | 1  |
| <b>Supplementary Figure 1.</b> Clinical images of subject III-3, family 2, showing numerous papular melanocytic nevi..                                        | 2  |
| <b>Supplementary Figure 2.</b> Clinical images of subject II-6, family 2, showing only few papular melanocytic nevi....                                       | 11 |
| <b>Supplementary Figure 3.</b> Clinical images from various members of family 2 illustrating the similar clinical appearance of the melanocytic tumors.....   | 14 |
| <b>Supplementary Figure 4.</b> Clinical images of subject II-4, family 1.....                                                                                 | 15 |
| <b>Supplementary Figure 5.</b> Histopathology of melanocytic tumors with loss of chromosome 3.....                                                            | 16 |
| <b>Supplementary Figure 6.</b> Histopathology of additional representative melanocytic tumors.....                                                            | 17 |
| <b>Supplementary Figure 7.</b> Histopathology of melanocytic tumors that show loss of 3p21 and additional chromosomal aberrations.....                        | 18 |
| <b>Supplementary Figure 8.</b> Melanocytic tumor of uncertain malignant potential.....                                                                        | 19 |
| <b>Supplementary Figure 9.</b> Reconstruction of the haplotypes of 6 members of family 1 and loss of the paternal chromosome 3 in the melanocytic tumors..... | 20 |
| <b>Supplementary Figure 10.</b> <i>BAP1</i> germline mutation in family 1.....                                                                                | 21 |
| <b>Supplementary Figure 11.</b> Inactivation of the second <i>BAP1</i> allele in three melanocytic tumors by various mechanisms.....                          | 22 |
| <b>Supplementary Figure 12.</b> <i>BAP1</i> germline mutation in family 2.....                                                                                | 23 |
| <b>Supplementary Figure 13.</b> Flat, brown nevi composed of small uniform melanocytes do not show alterations of <i>BAP1</i> .....                           | 24 |
| <b>Supplementary Figure 14.</b> Sporadic atypical Spitz tumor with a somatic acquired <i>BAP1</i> mutation.....                                               | 25 |
| <b>Supplementary Figure 15.</b> Extended pedigree of family 1.....                                                                                            | 26 |

## SUPPLEMENTARY TABLES

|                                                                                                                                     |    |
|-------------------------------------------------------------------------------------------------------------------------------------|----|
| <b>Supplementary Table 1:</b> Clinico-pathological details of melanoma and melanocytic tumors of uncertain malignant potential..... | 27 |
| <b>Supplementary Table 2:</b> <i>BAP1</i> status in melanocytic tumors of family 1.....                                             | 28 |
| <b>Supplementary Table 3:</b> <i>BAP1</i> status in melanocytic tumors of family 2.....                                             | 30 |
| <b>Supplementary Table 4:</b> Somatic mutations of <i>BAP1</i> in common acquired melanocytic nevi.....                             | 31 |
| <b>Supplementary Table 5:</b> Somatic mutations of <i>BAP1</i> in Spitz nevi.....                                                   | 32 |
| <b>Supplementary Table 6:</b> Somatic mutations of <i>BAP1</i> in atypical Spitz tumors.....                                        | 33 |
| <b>Supplementary Table 7:</b> Somatic mutations of <i>BAP1</i> in sporadic cutaneous melanomas.....                                 | 34 |
| <b>Supplementary Table 8:</b> Somatic mutations of <i>BAP1</i> in primary uveal melanomas.....                                      | 36 |
| <b>Supplementary Table 9:</b> Primer for <i>BAP1</i> sequencing.....                                                                | 37 |

## **Legends of Supplementary Figure 1-4. Clinical pictures.**

**Supplementary Figure 1. Clinical images of subject III-3, family 2, showing numerous papular melanocytic nevi.** (a-e) The trunk and (f-i) the upper arms show numerous brown pigmented, mostly flat nevi, but in addition also the characteristic, non-pigmented exophytic melanocytic tumors. (j-l) Details of non-pigmented, pedunculated skin lesions on the right upper arm. Additional skin-colored, papular to pedunculated melanocytic tumors are found behind the (m, n) ear, (o) on the neck, (p) and on the scalp. A melanoma was excised from the scalp previously.

**Supplementary Figure 2. Clinical images of subject II-6, family 2, showing only few papular melanocytic nevi.** (a) In contrast to subject III-3, family 2, the back of patient II-6 shows fewer brown, macular nevi and skin-colored papules. (b-e) The characteristic exophytic lesions are present on the arms. (f-i) Details of the characteristic melanocytic tumors on the right upper arm. This patient had a melanoma that metastasized.

**Supplementary Figure 3. Clinical images from various members of family 2 illustrating the similar clinical appearance of the melanocytic tumors.**

(a) Typical papular, dome-shaped, melanocytic tumors are found on the cheek of subject III-1 and (b) on the right upper arm of subject II-3. (c) Characteristic slightly pigmented, papular melanocytic tumor on the neck of subject III-4 and, in addition, numerous flat, brown nevi. Some of these flat, brown nevi were excised for diagnostic purposes, but did not show loss of *BAP1* as shown in **Supplementary Figure 13**. (d) The left supraclavicular region of subject III-2 displays the characteristic skin-colored, sharply demarcated nevi.

**Supplementary Figure 4. Clinical images of subject II-4, family 1.**

(a, b) The back of the trunk shows inconspicuous, small, skin-colored, sharply demarcated, dome-shaped melanocytic tumors. (c) Two typical lesions are shown on the right ear.

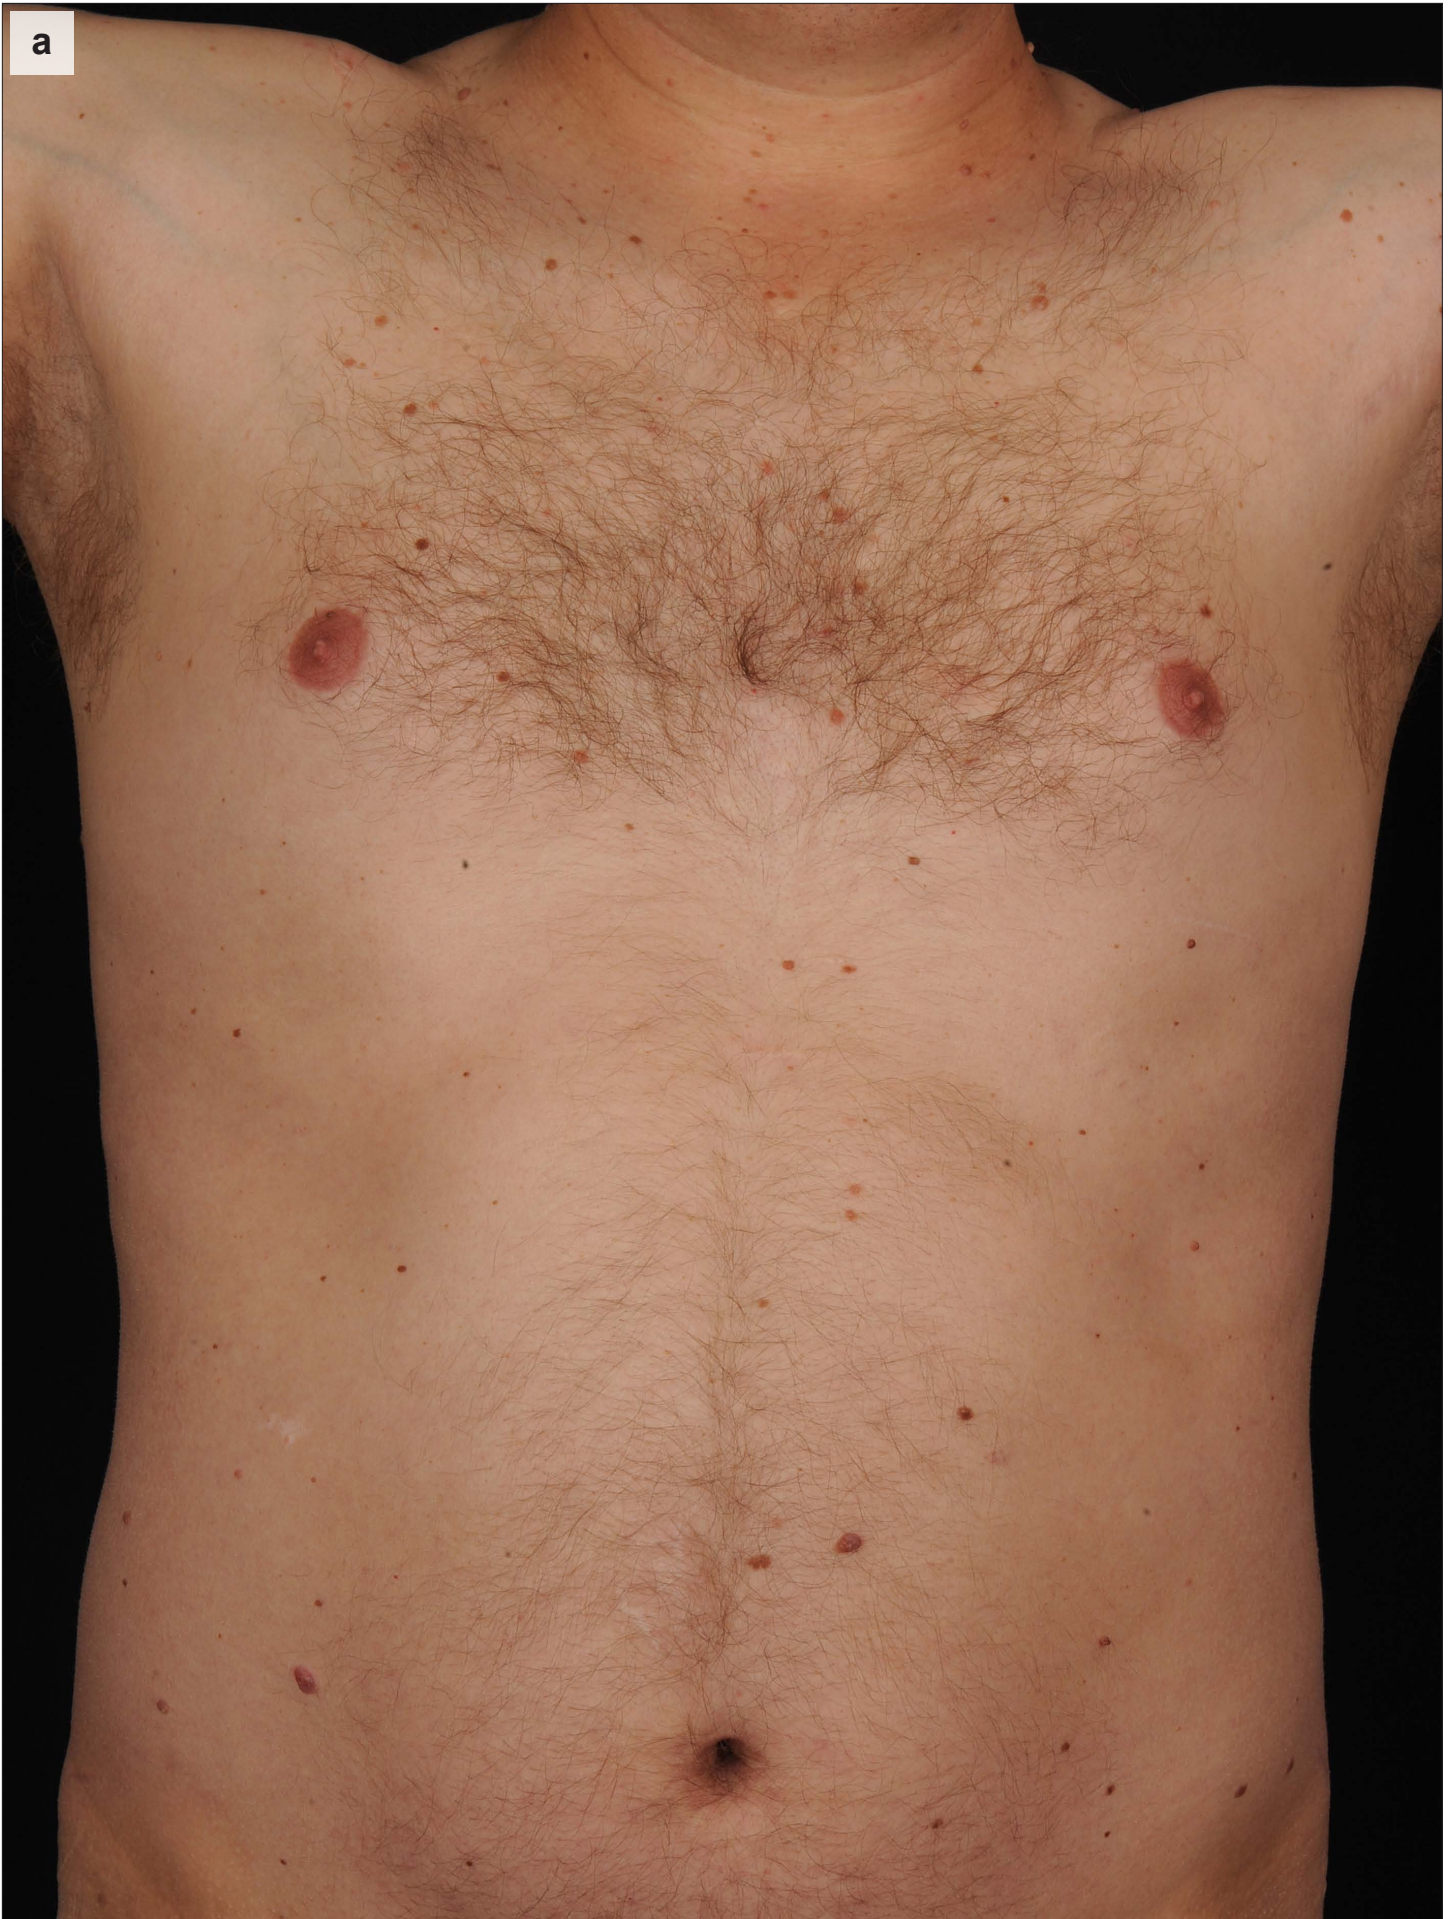

**a**

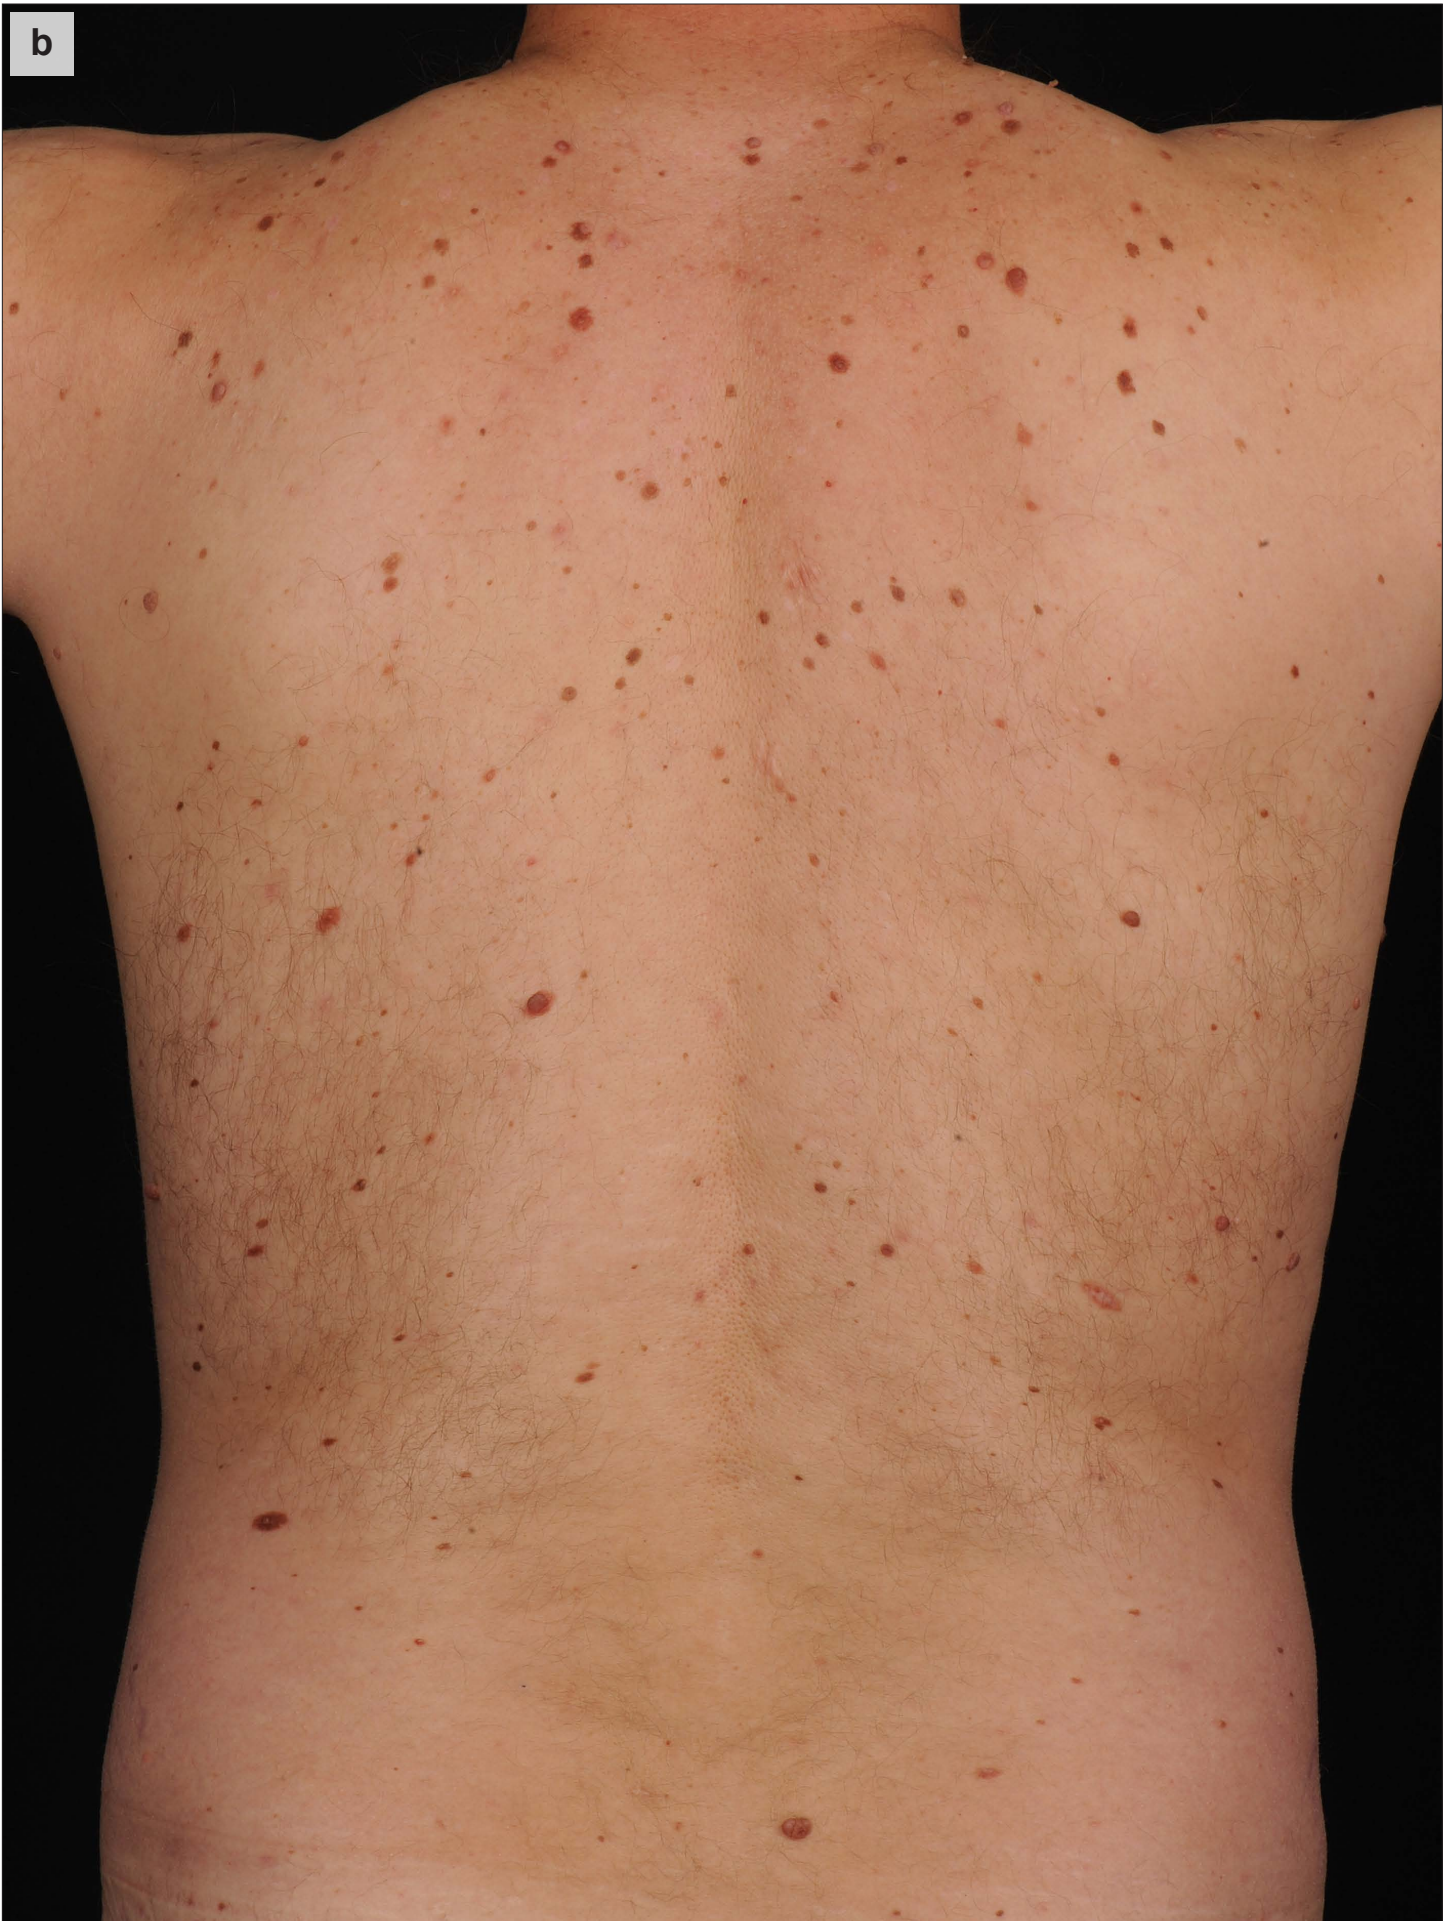

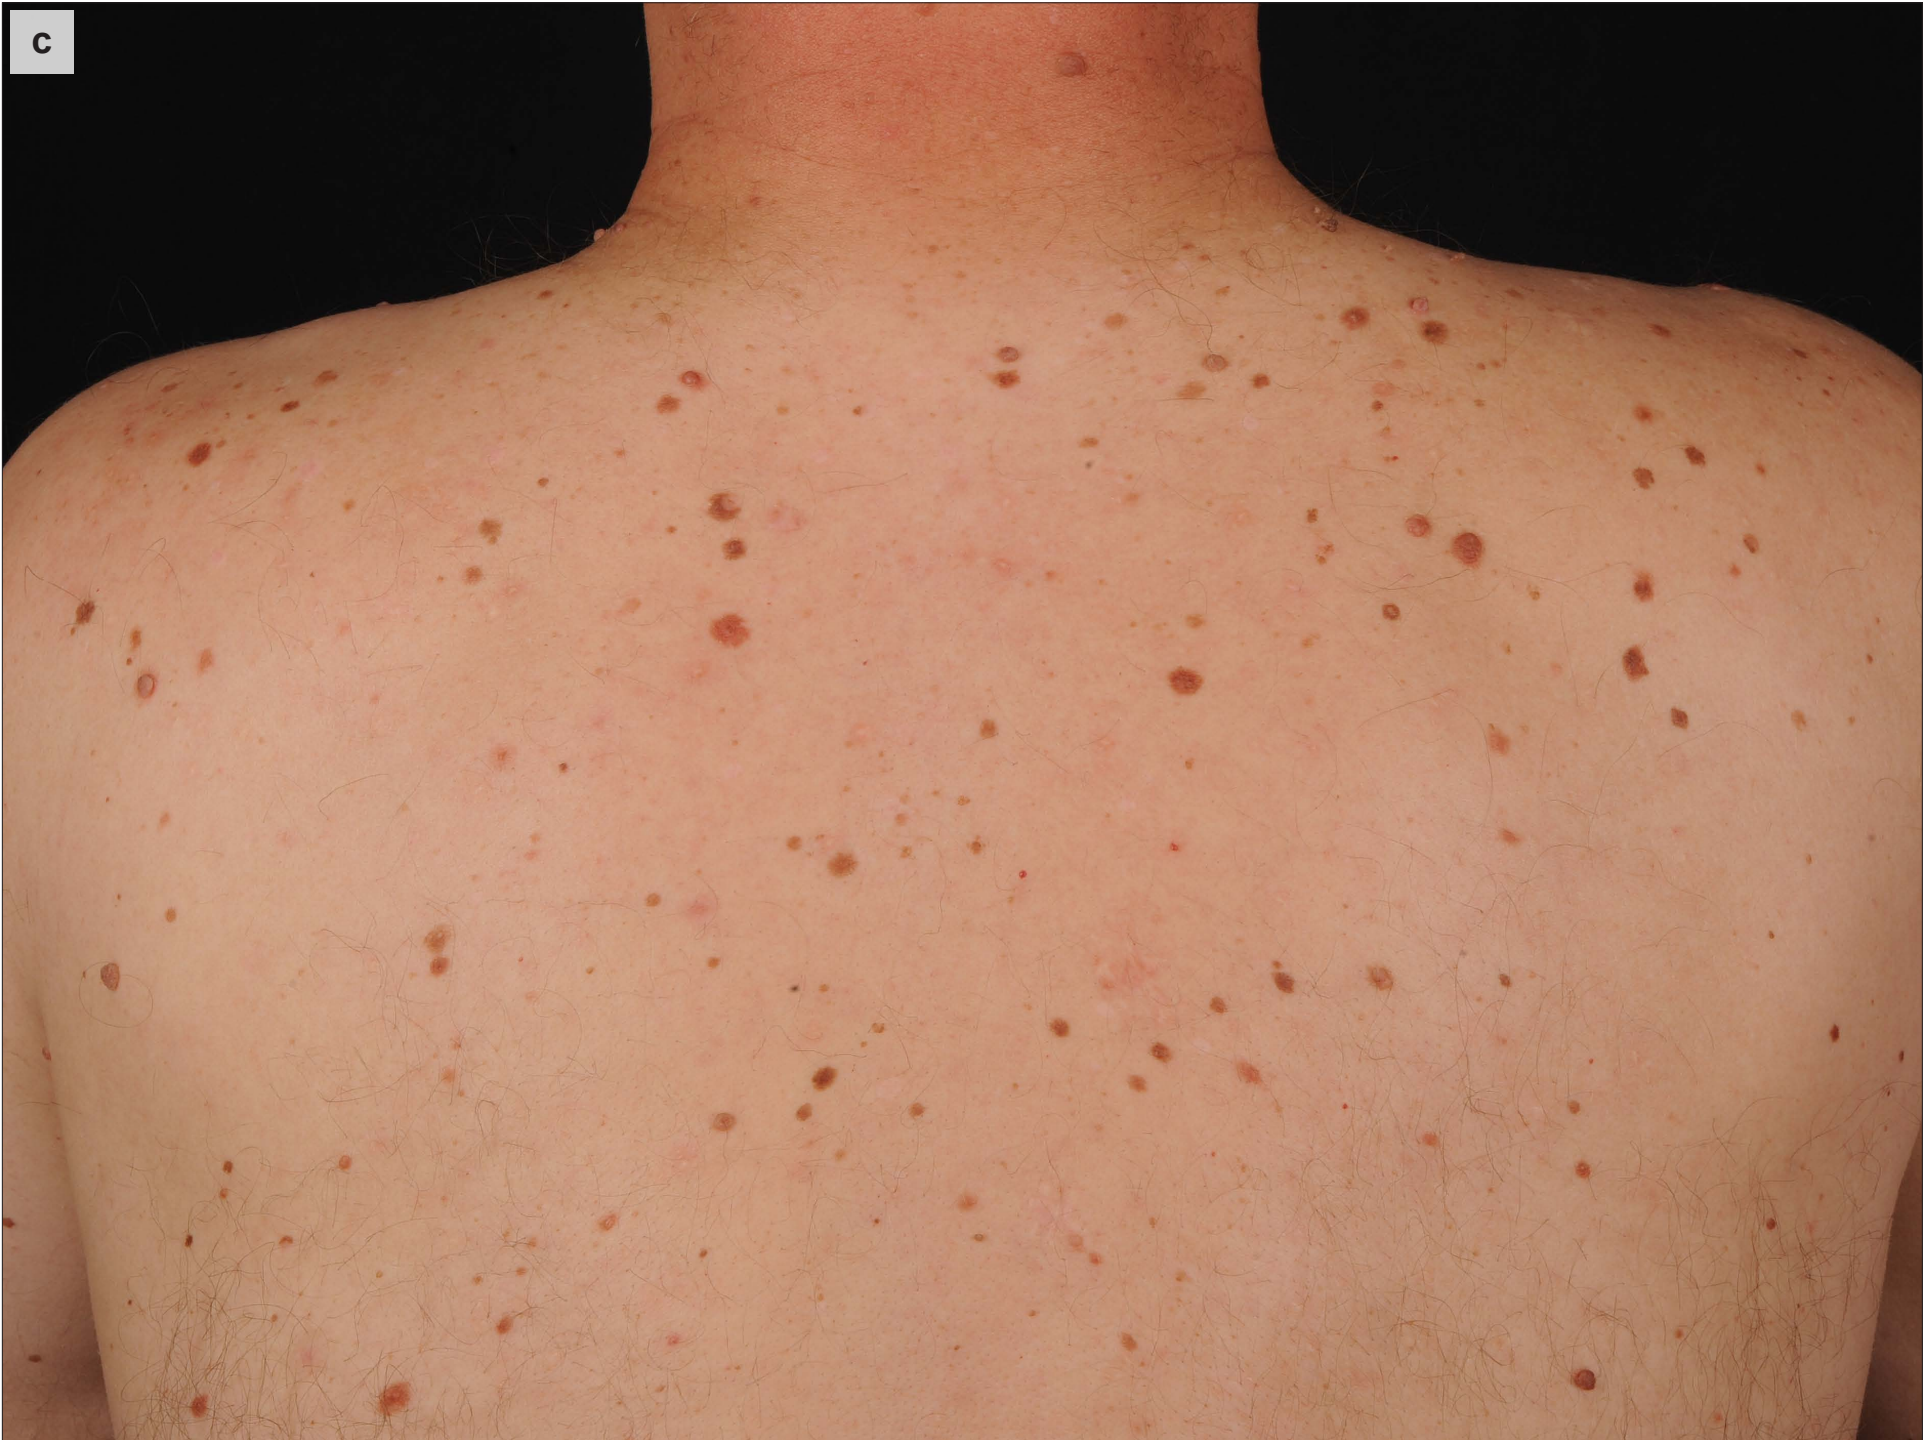

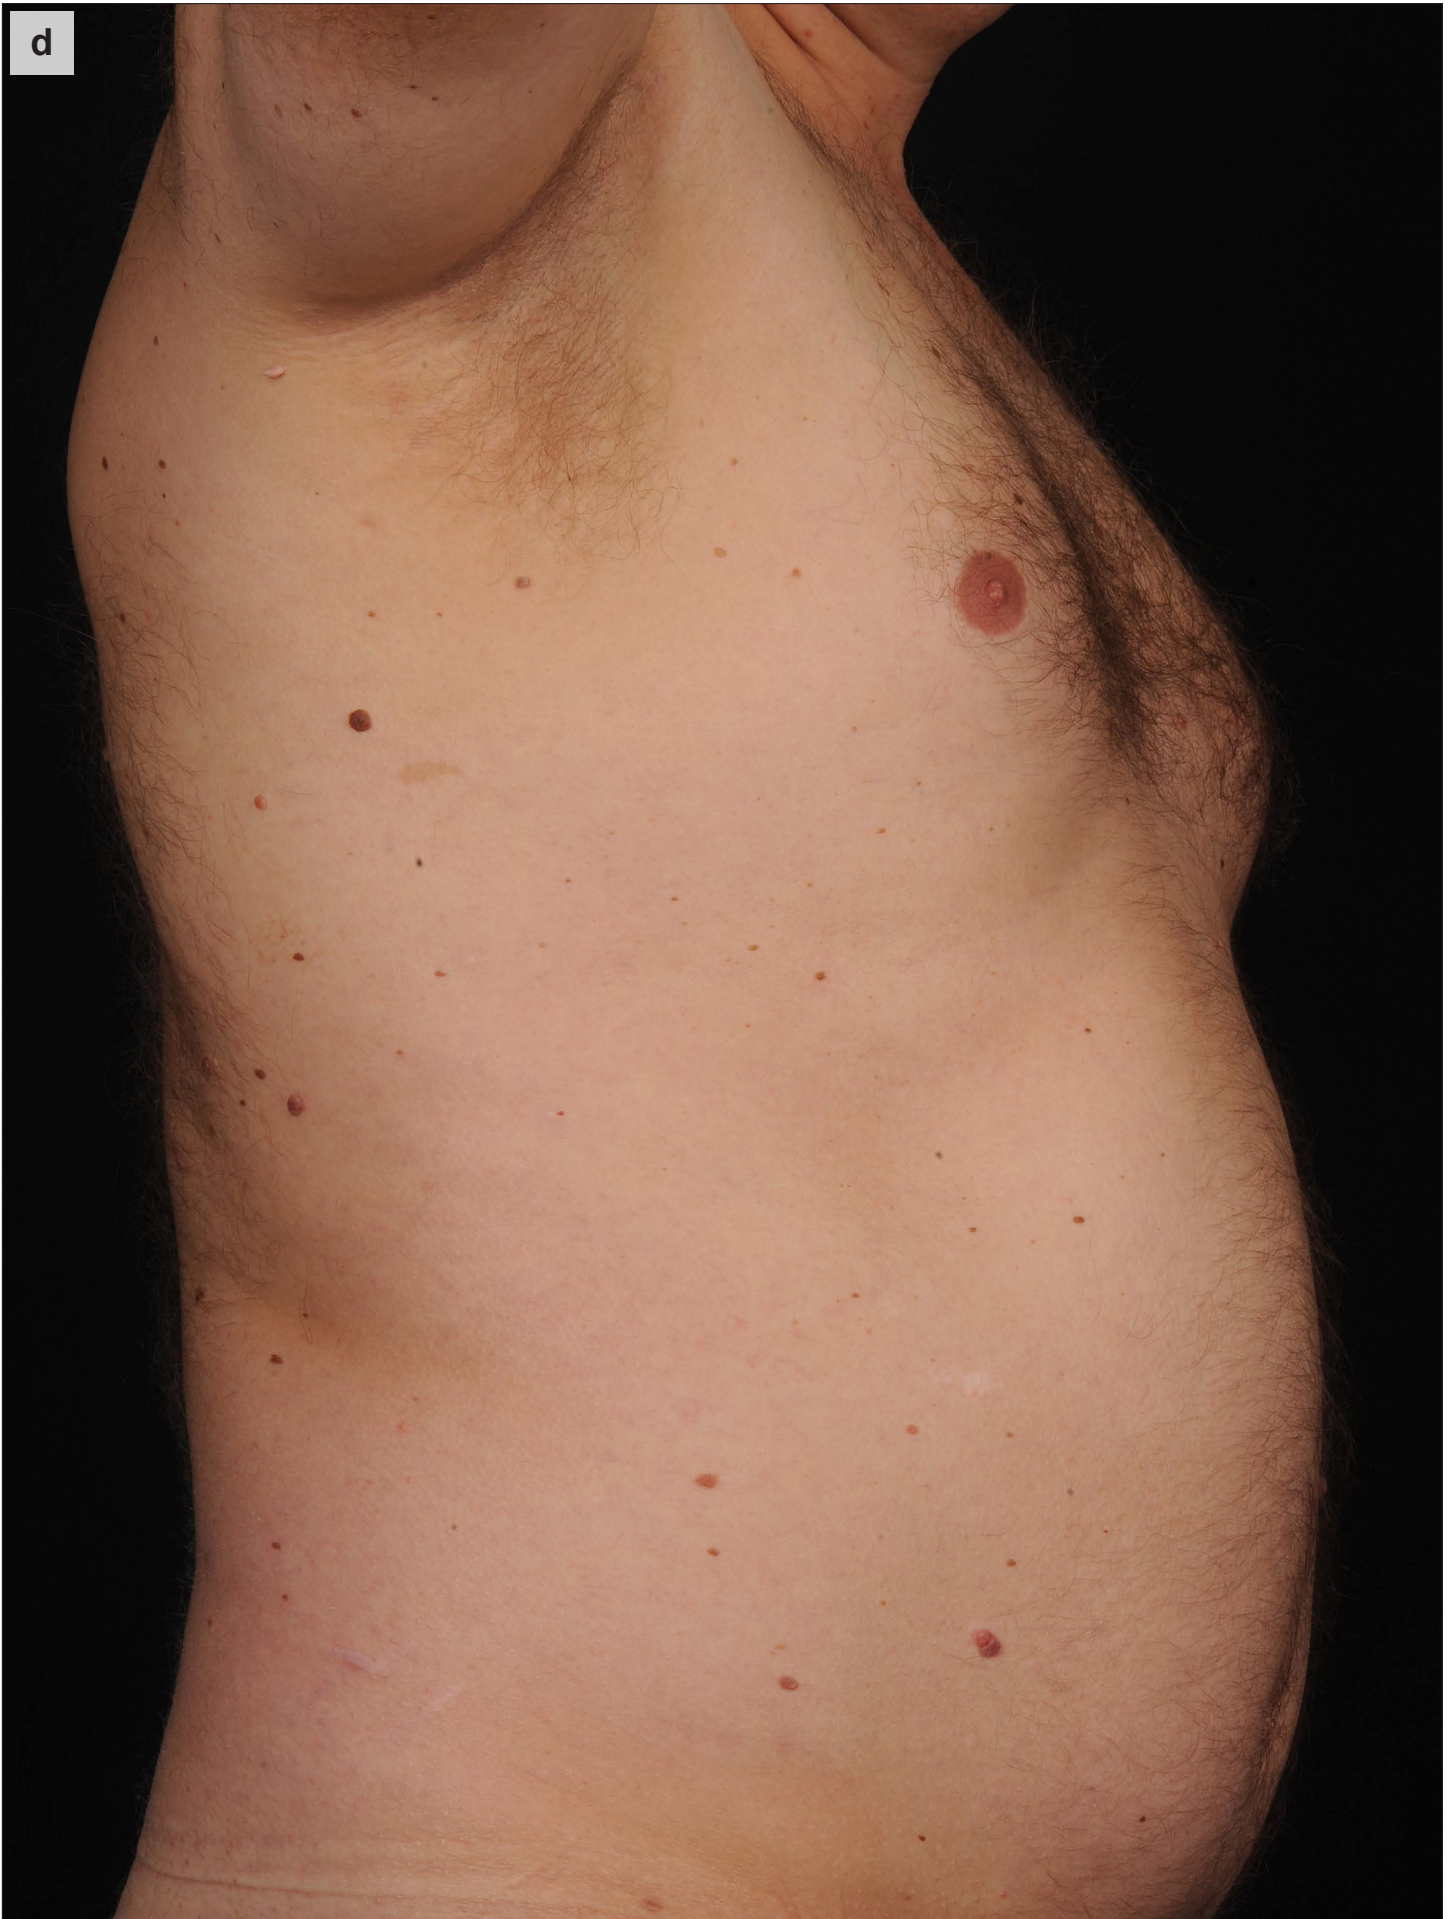

e

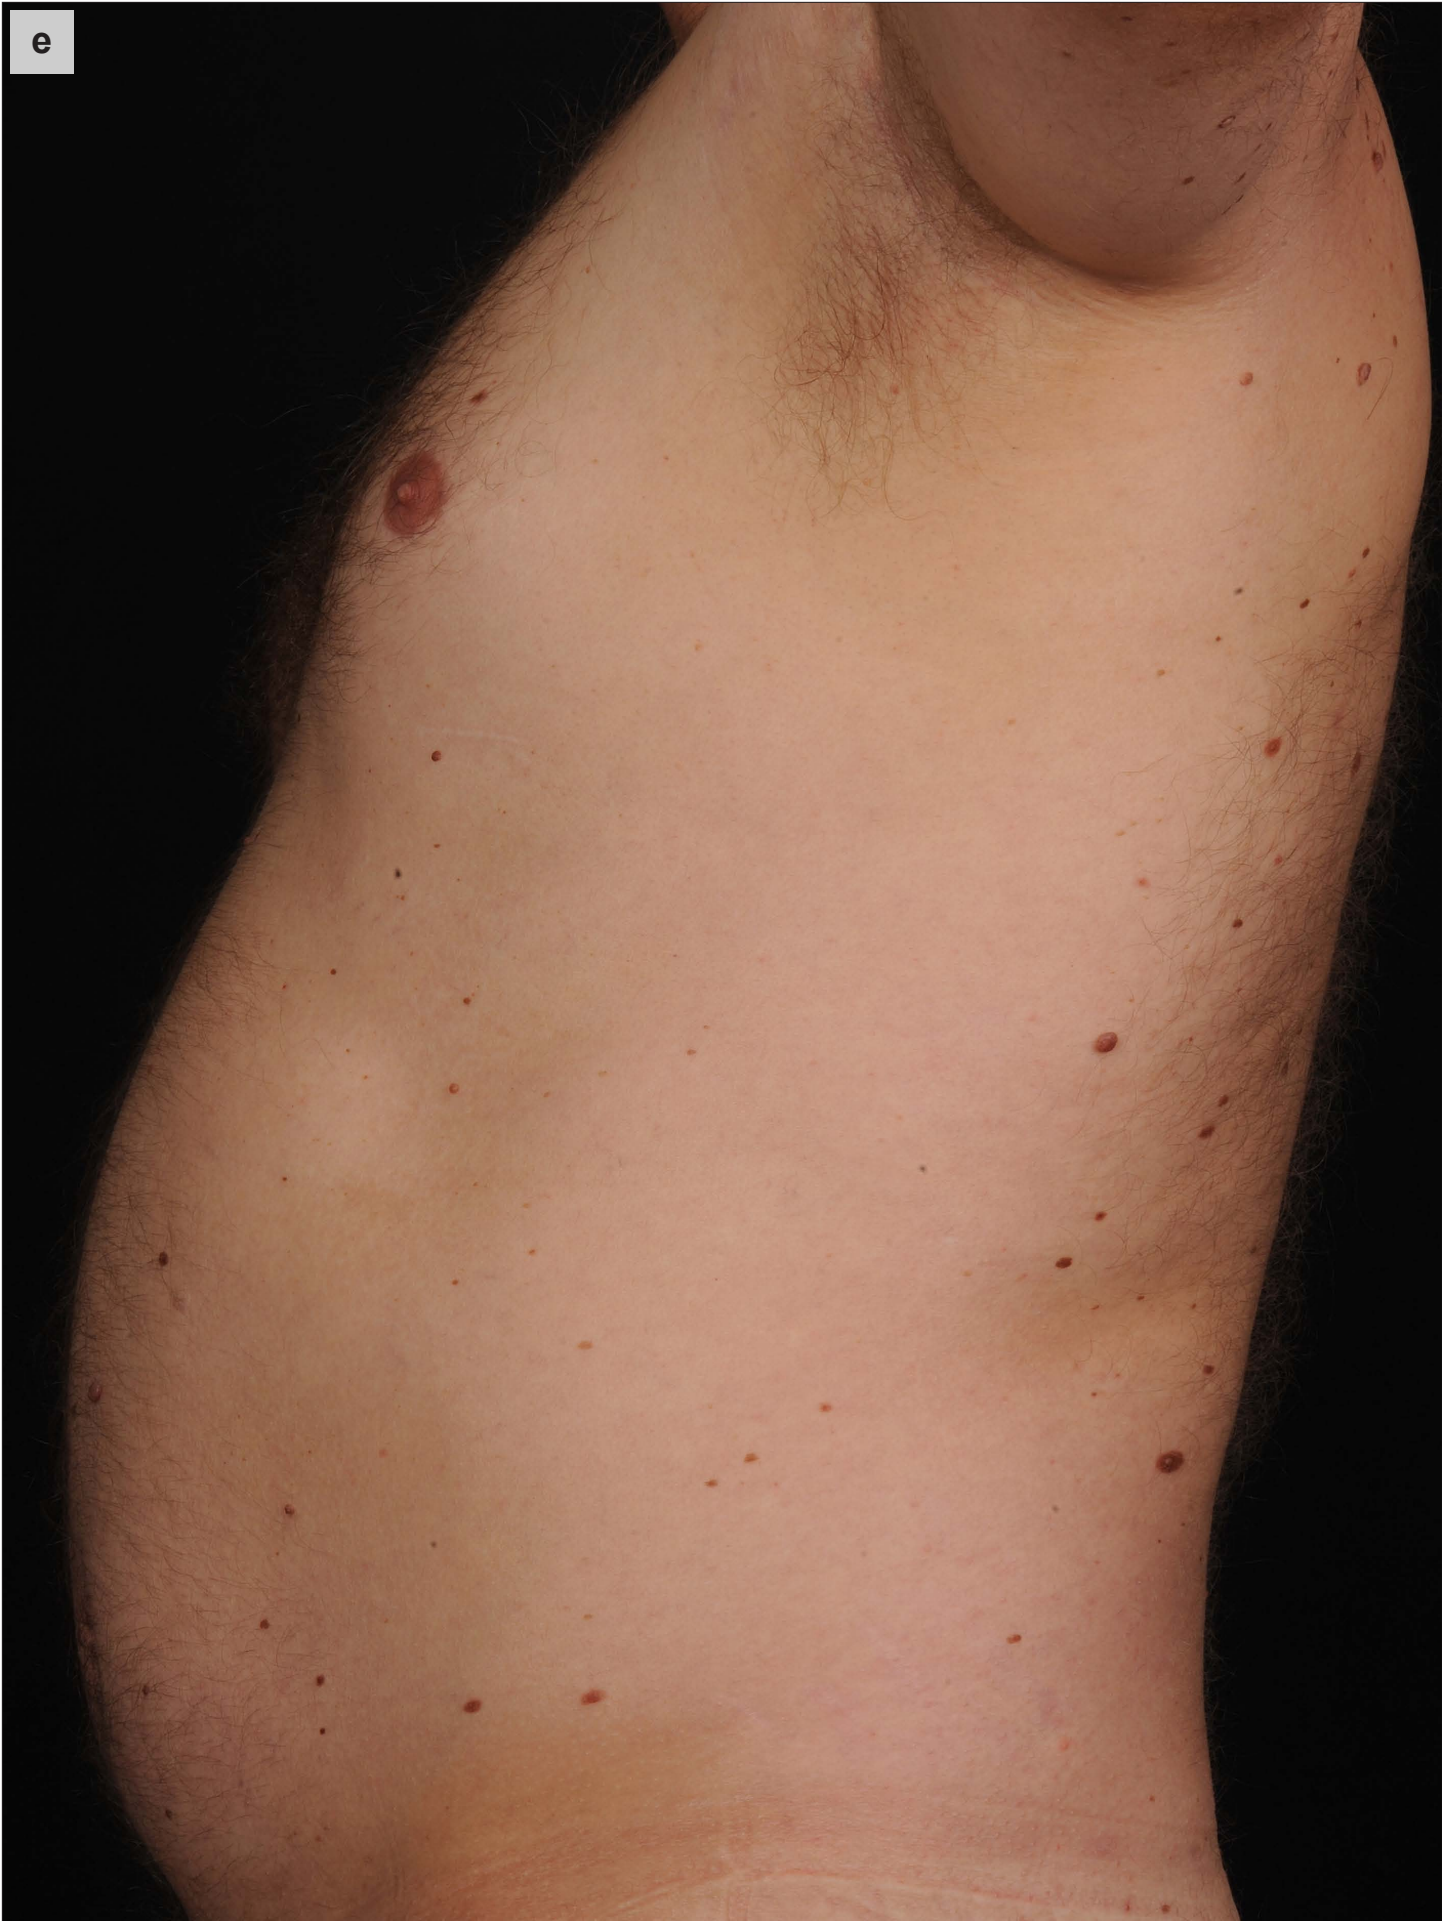



Supplementary Figure 1

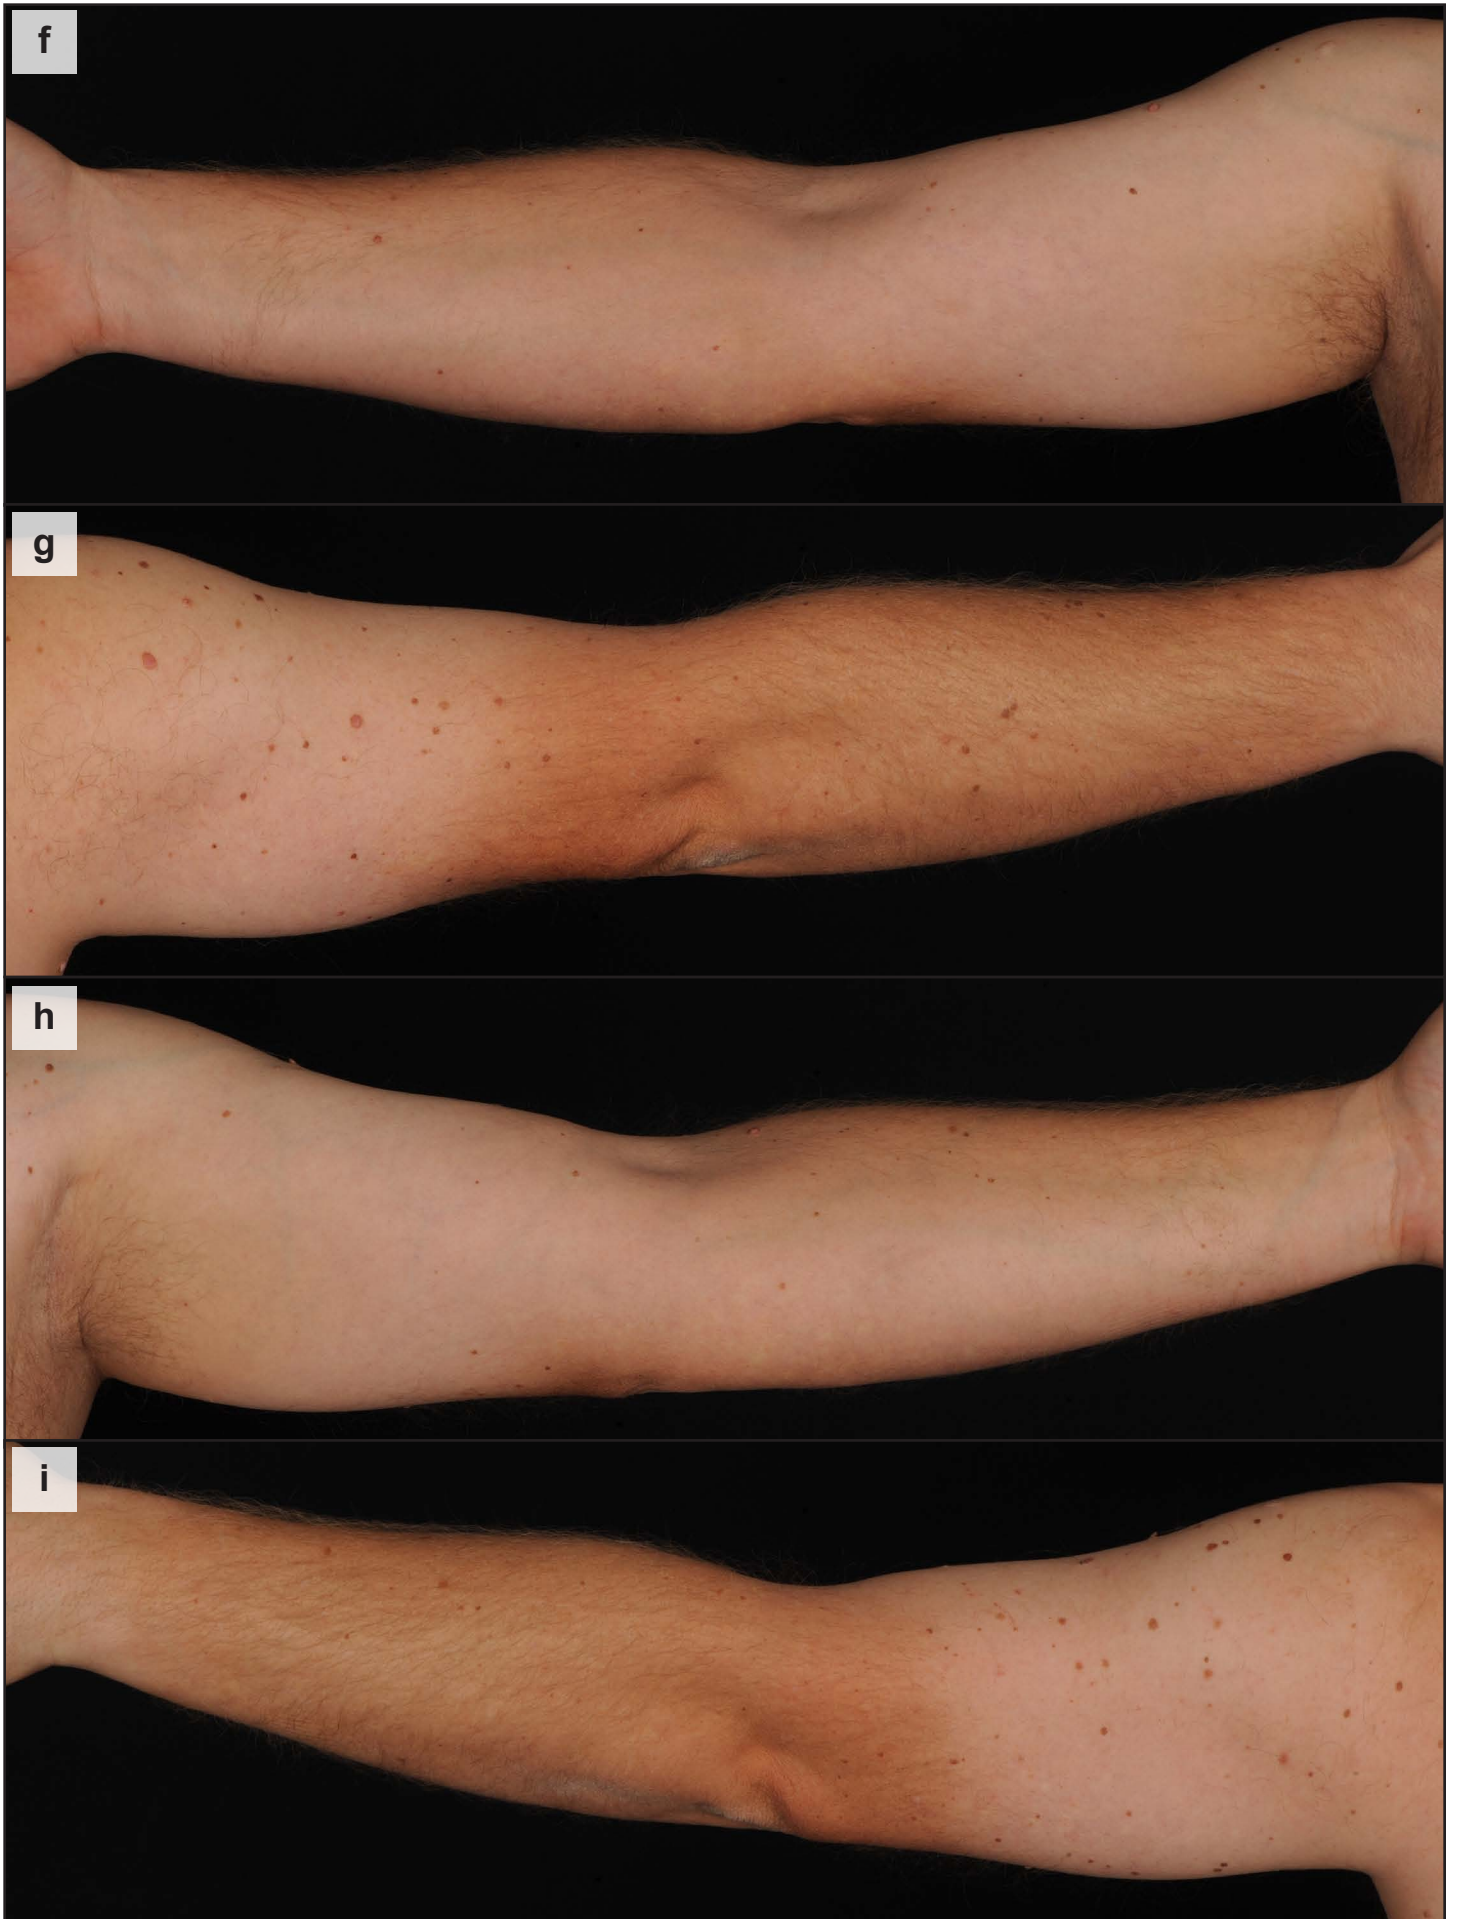

Supplementary Figure 1

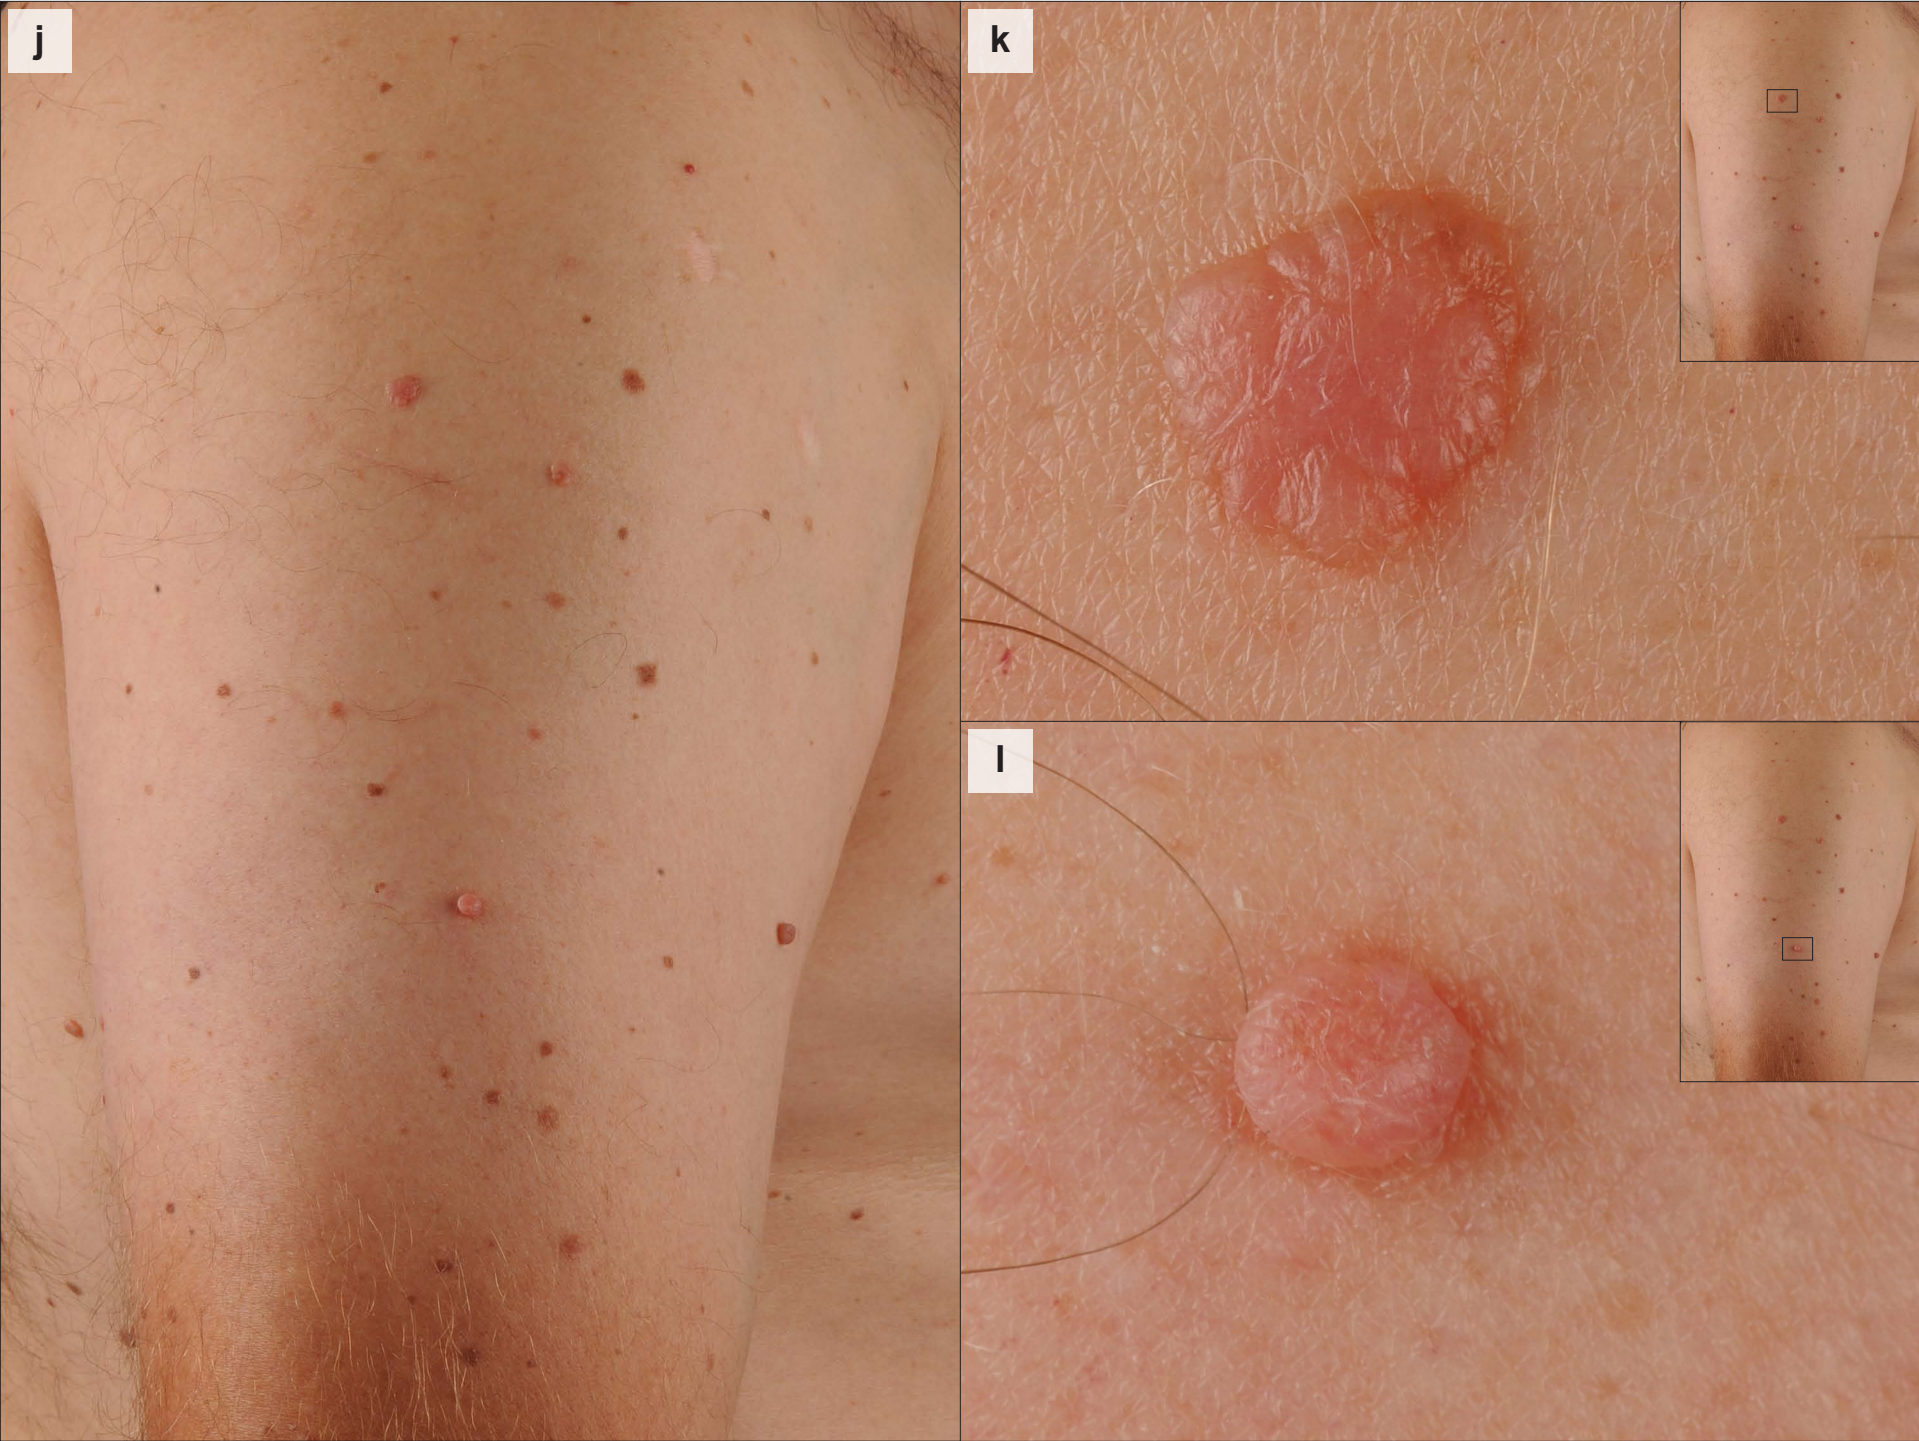

Supplementary Figure 1

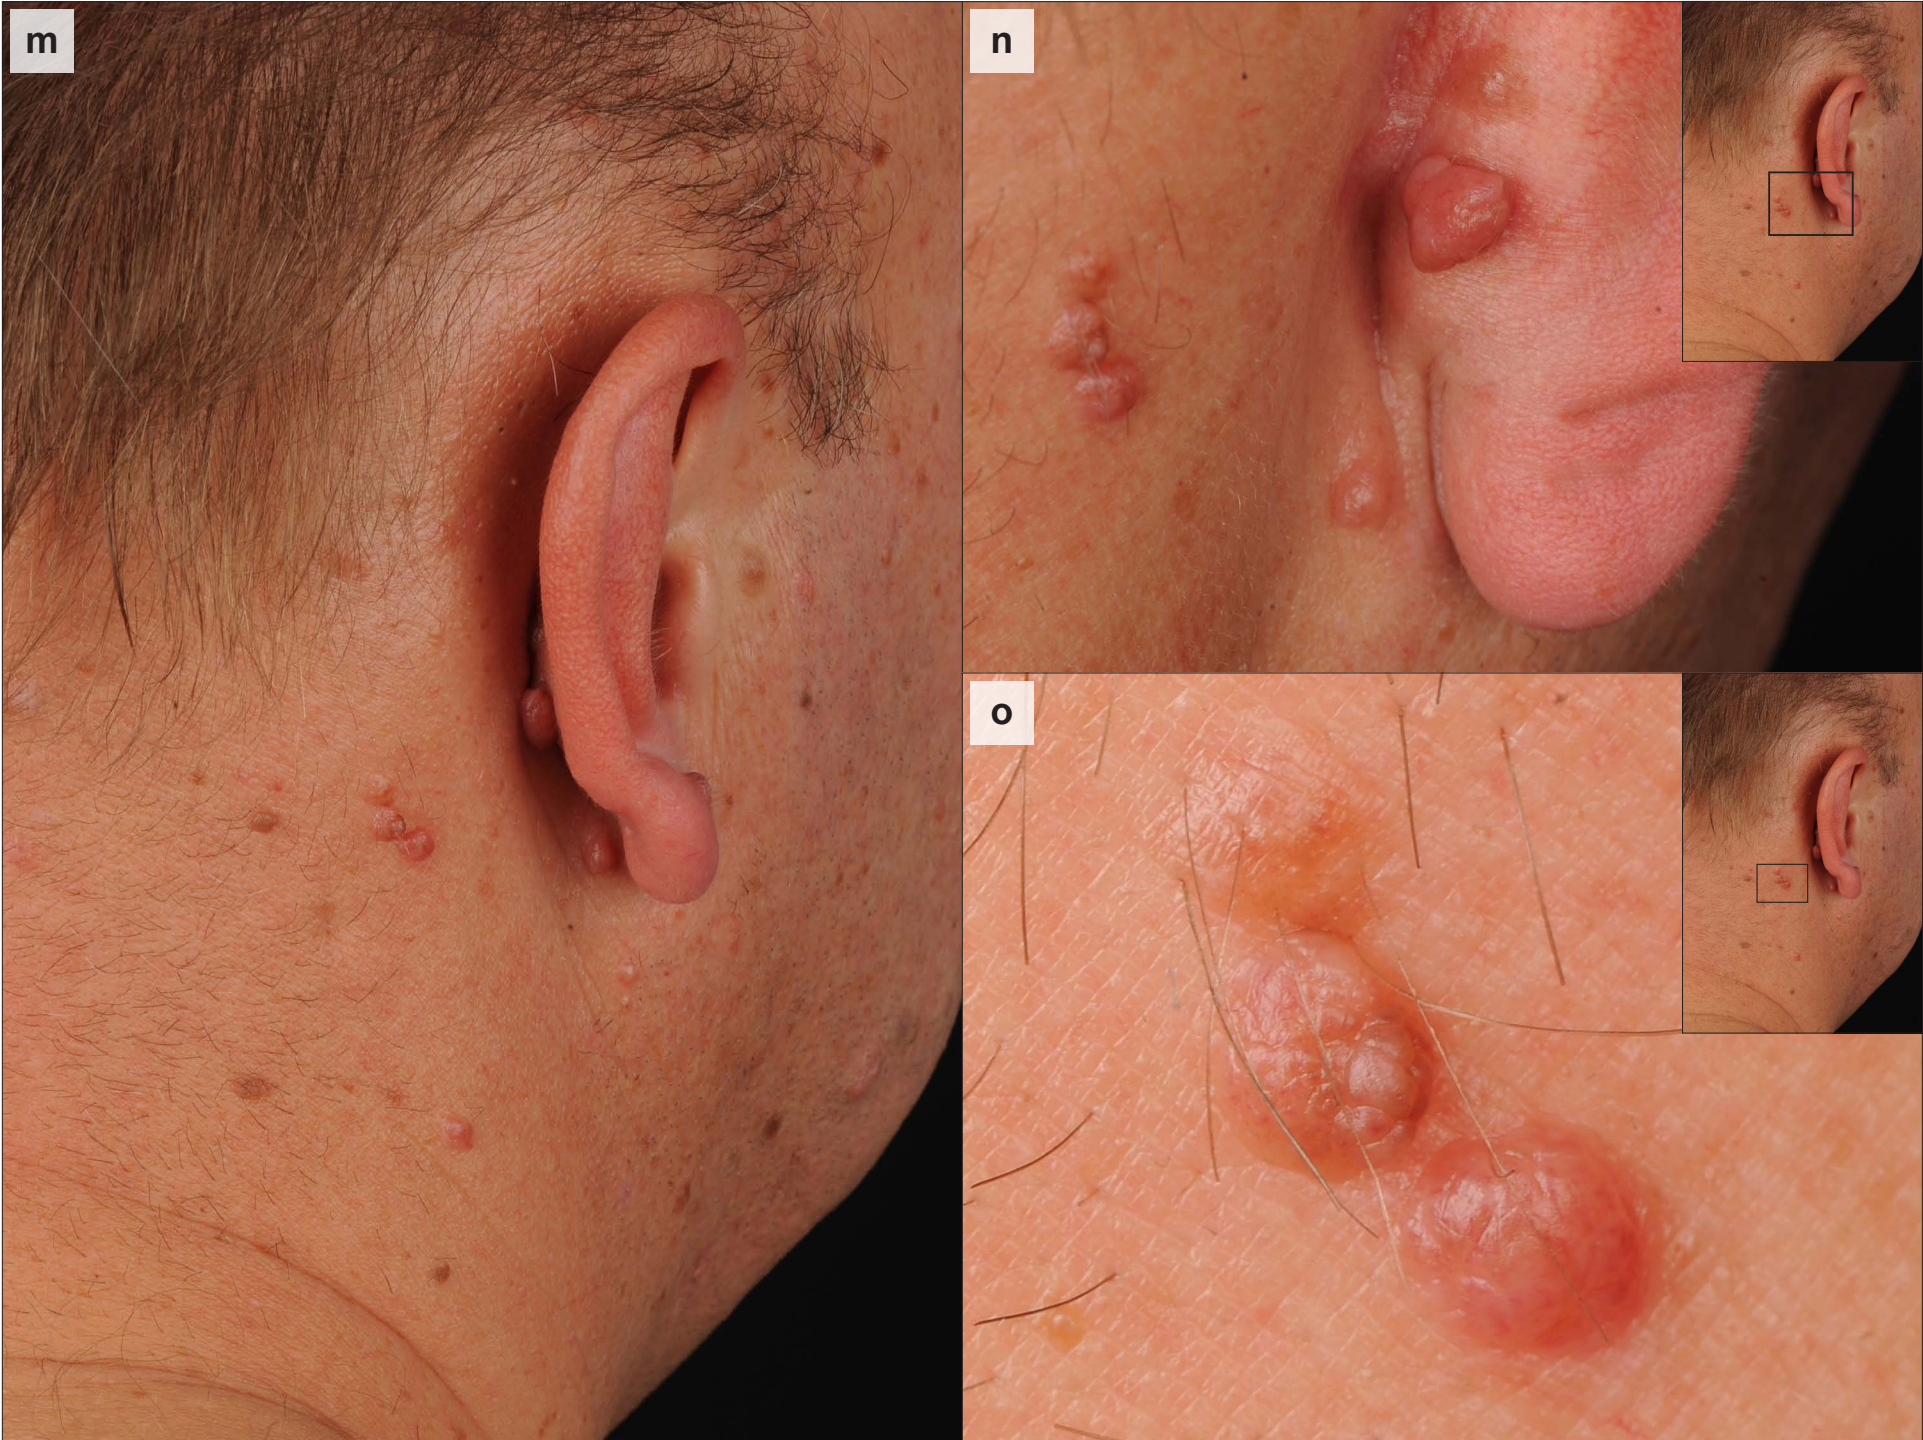

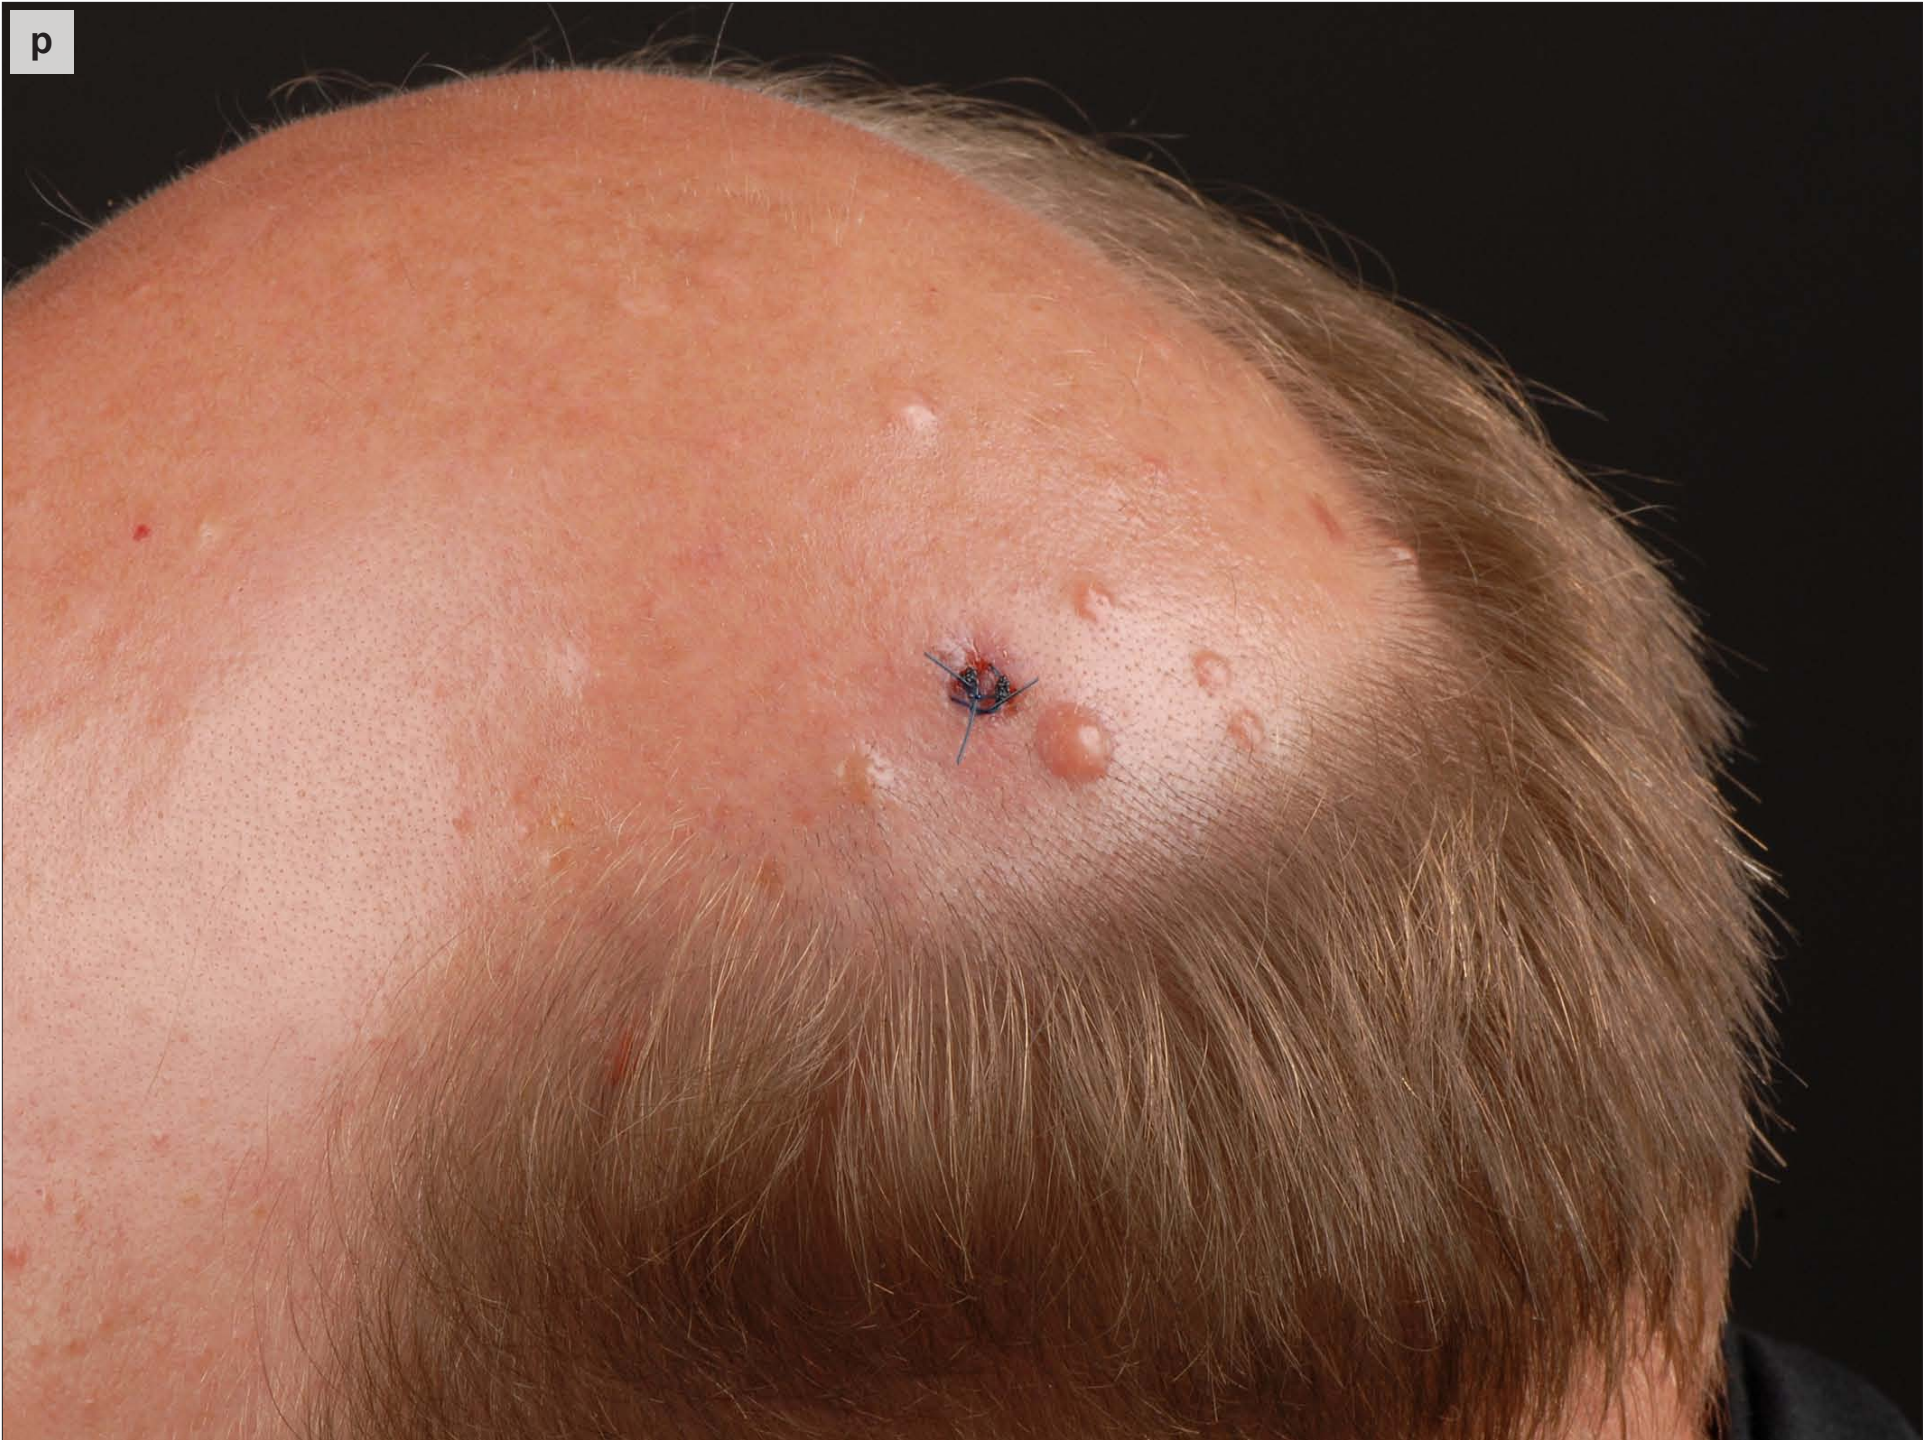

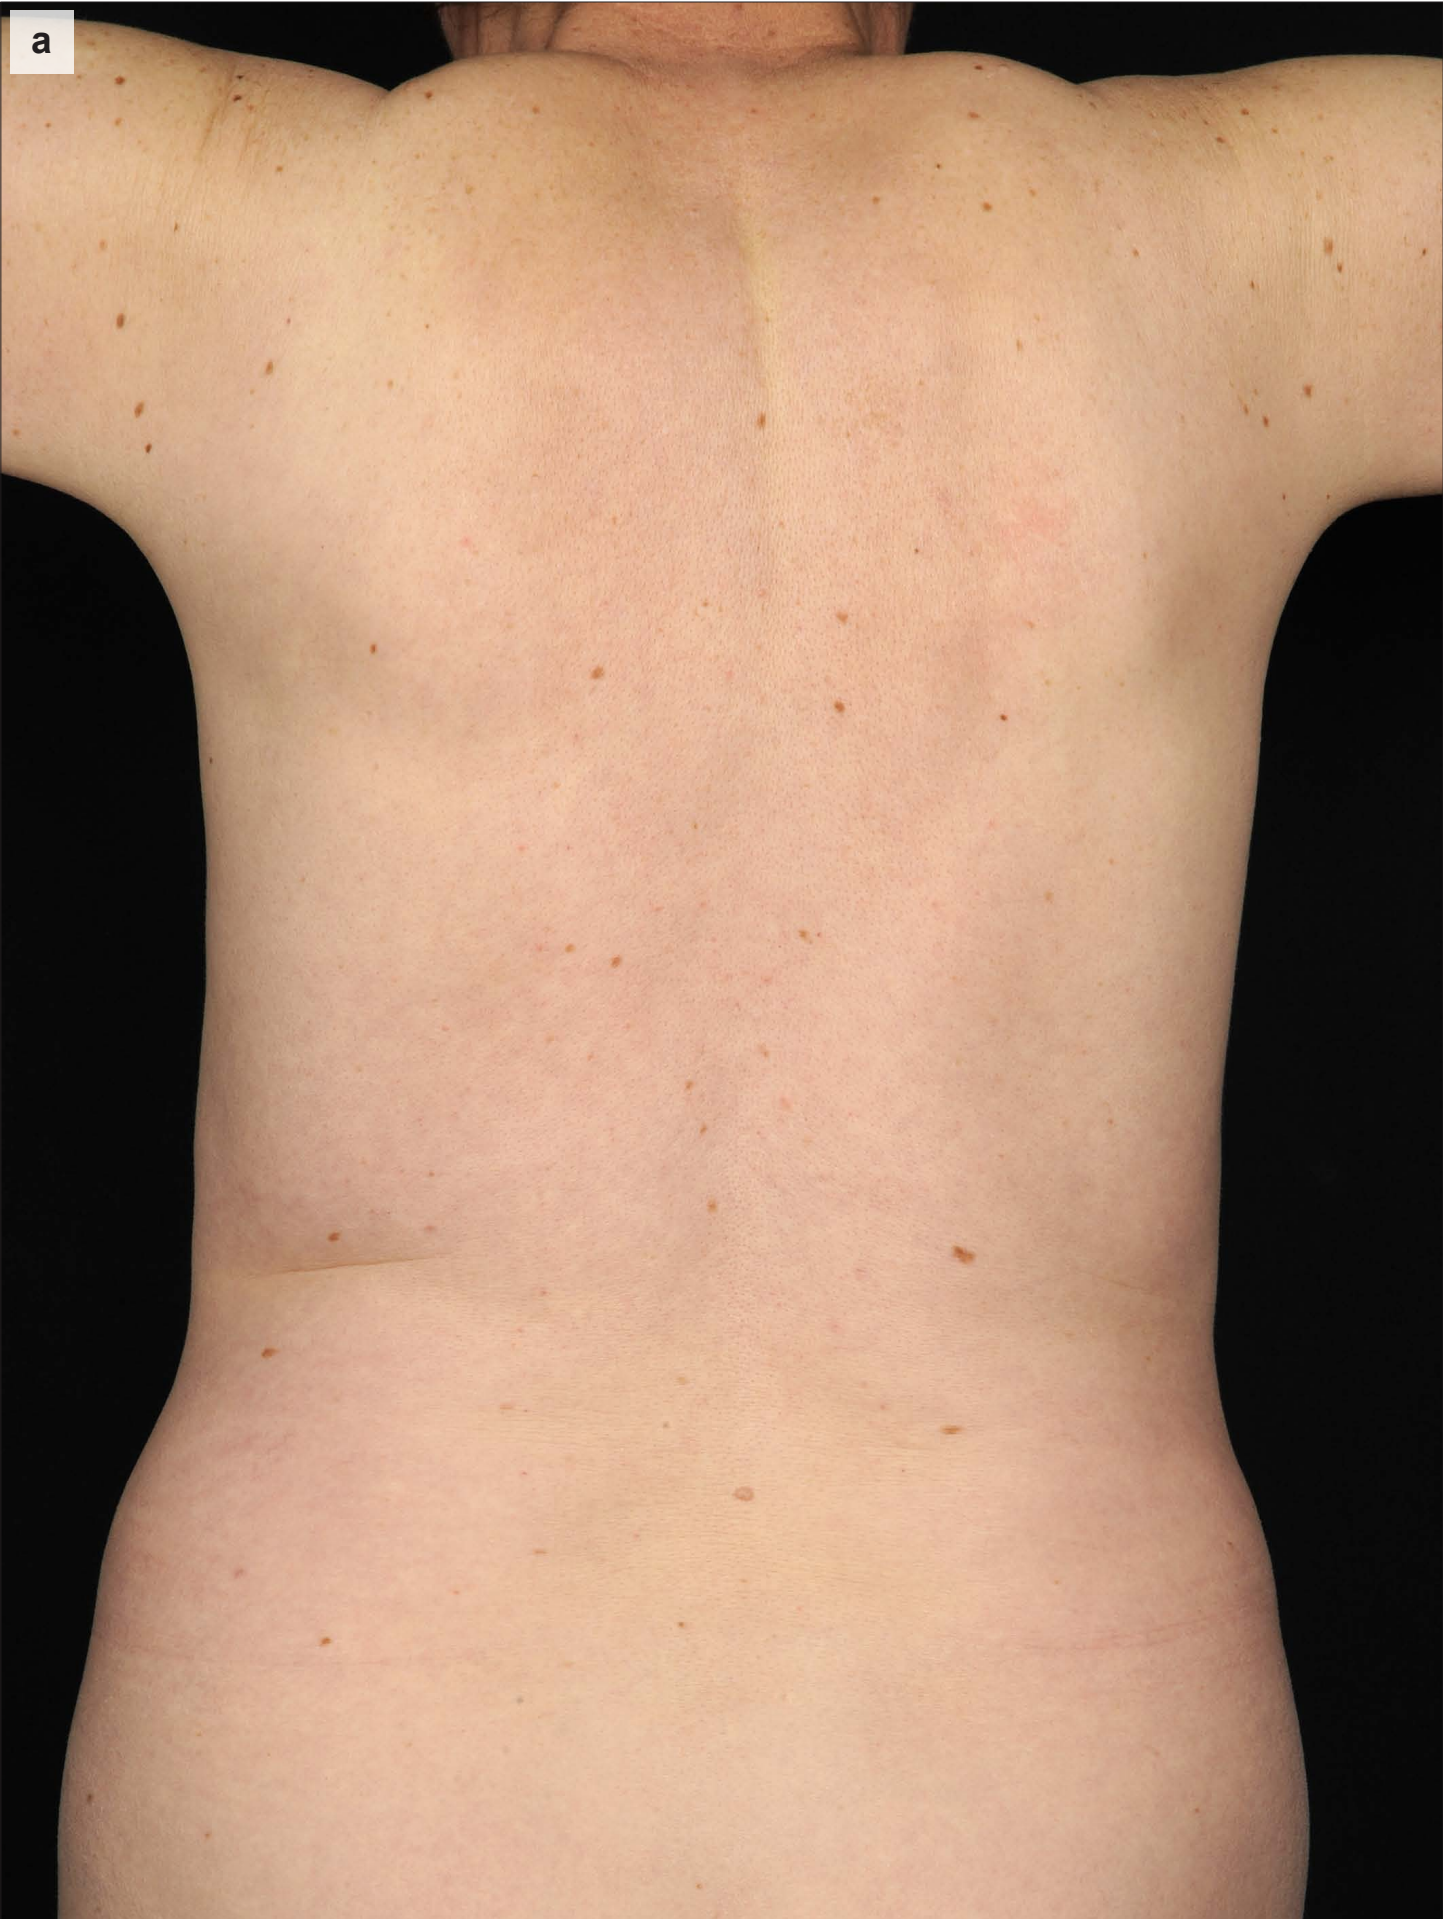

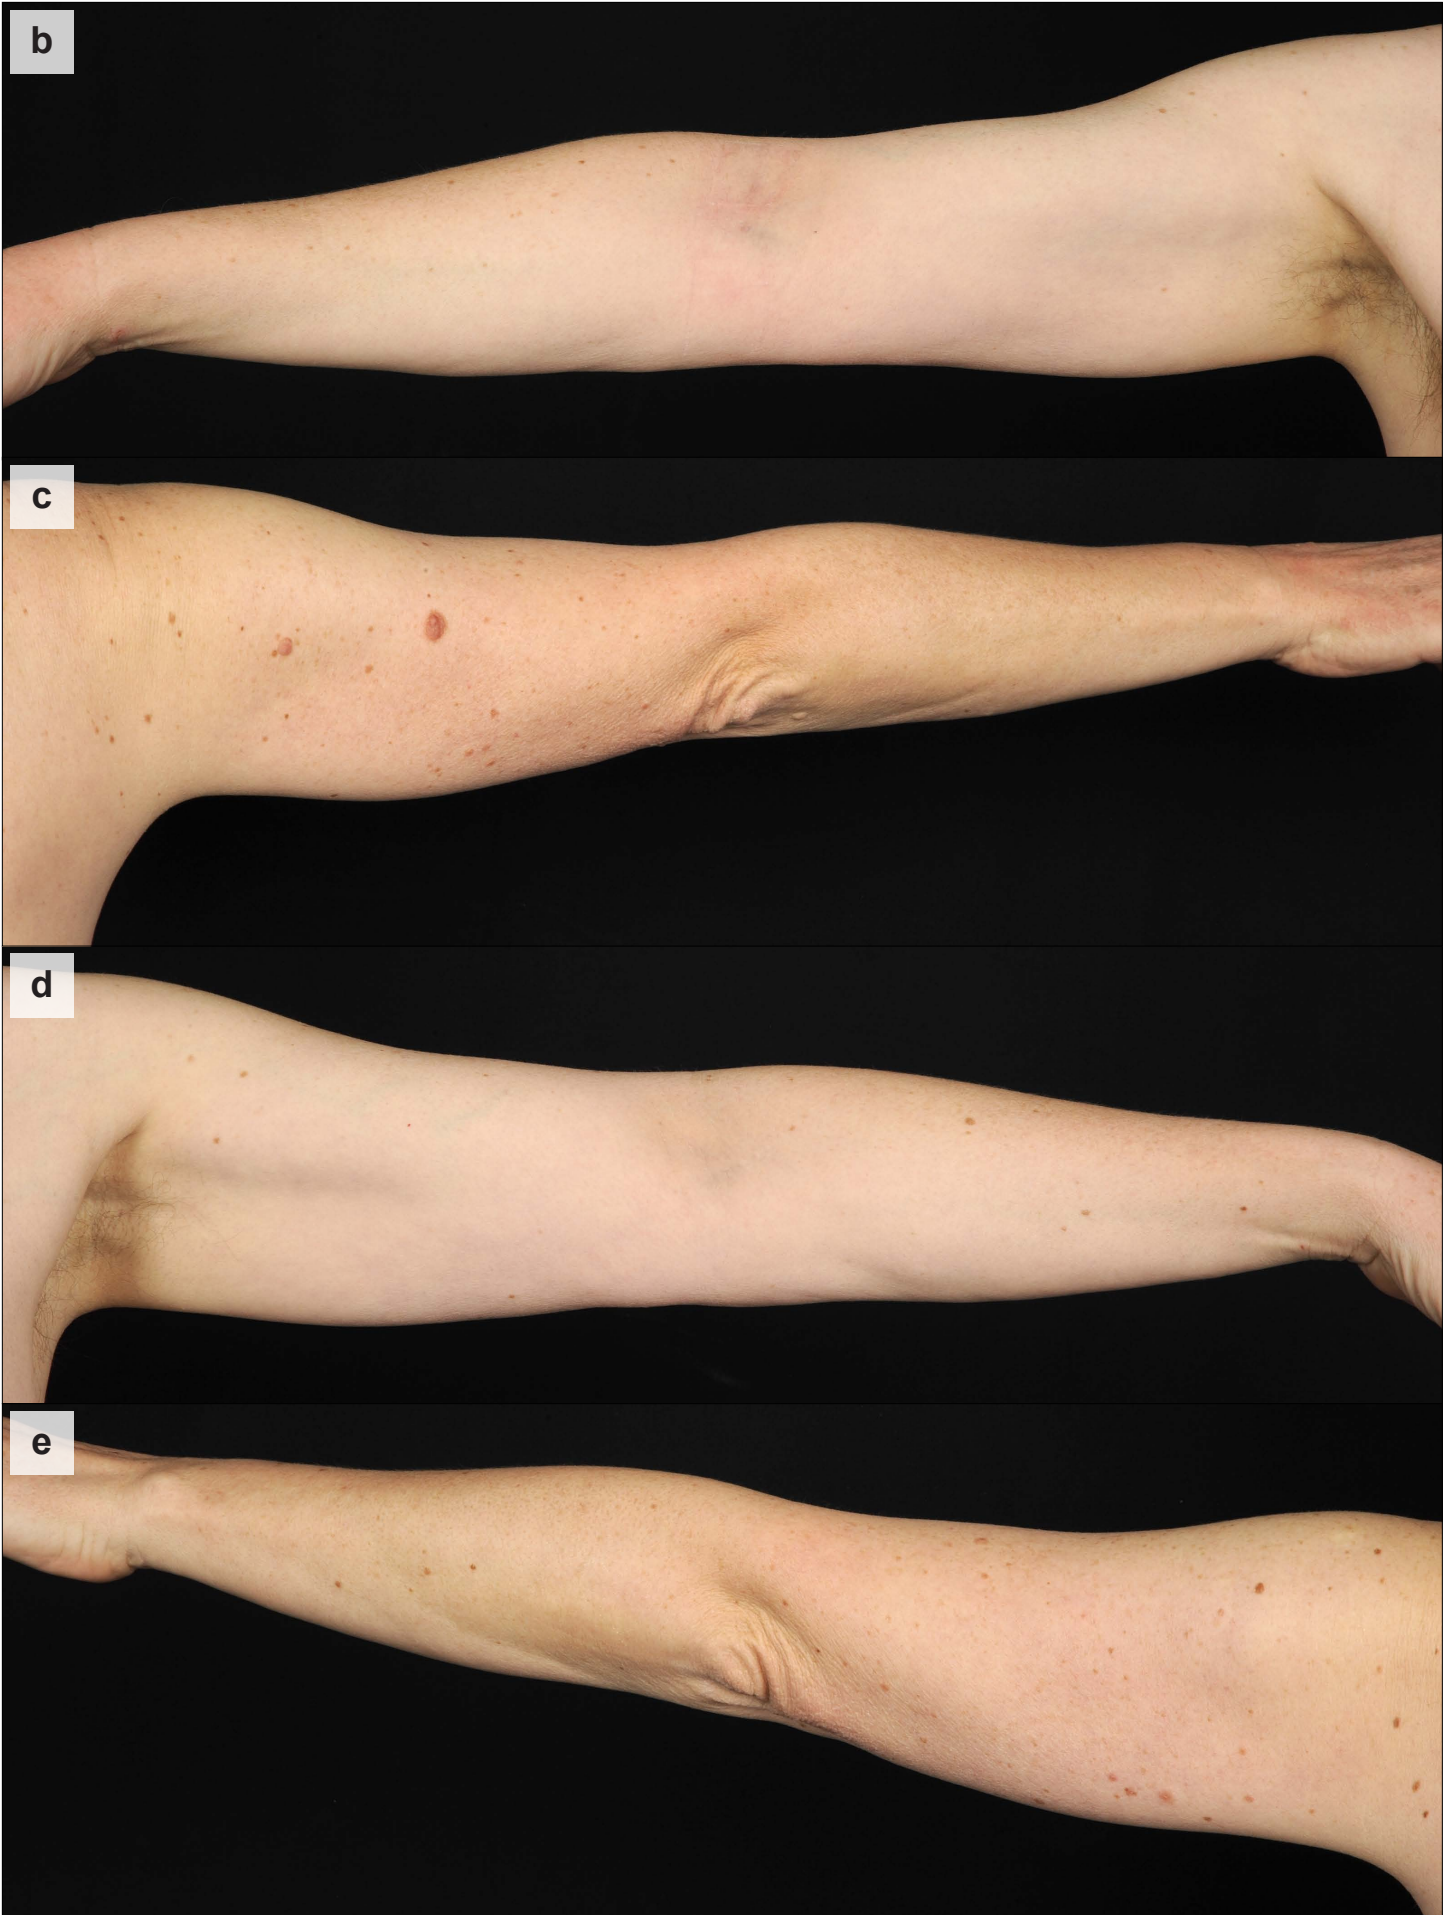

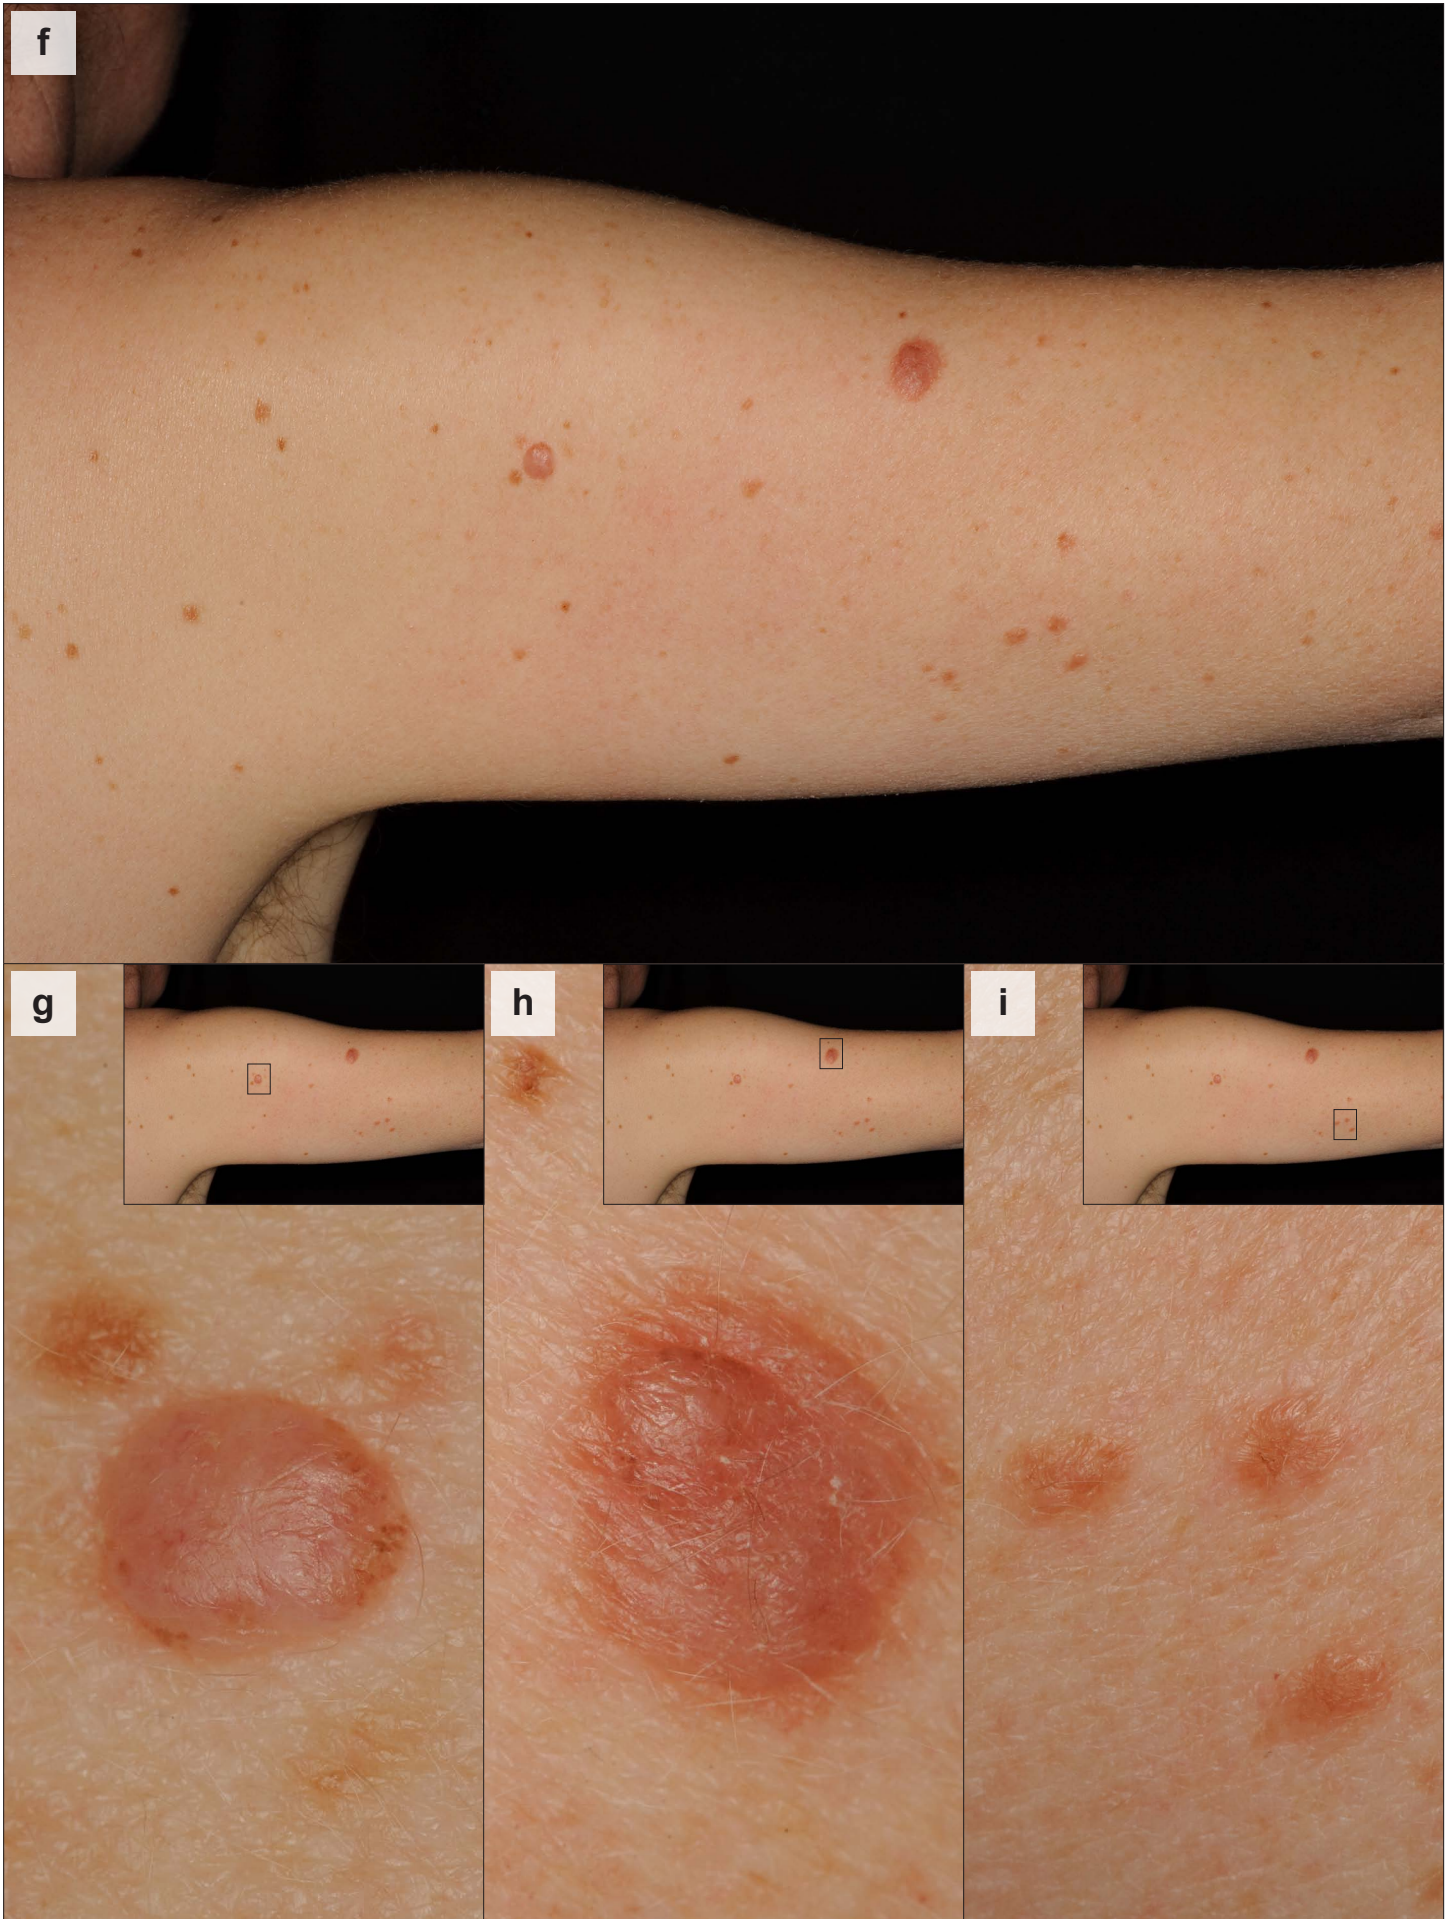

Supplementary Figure 3

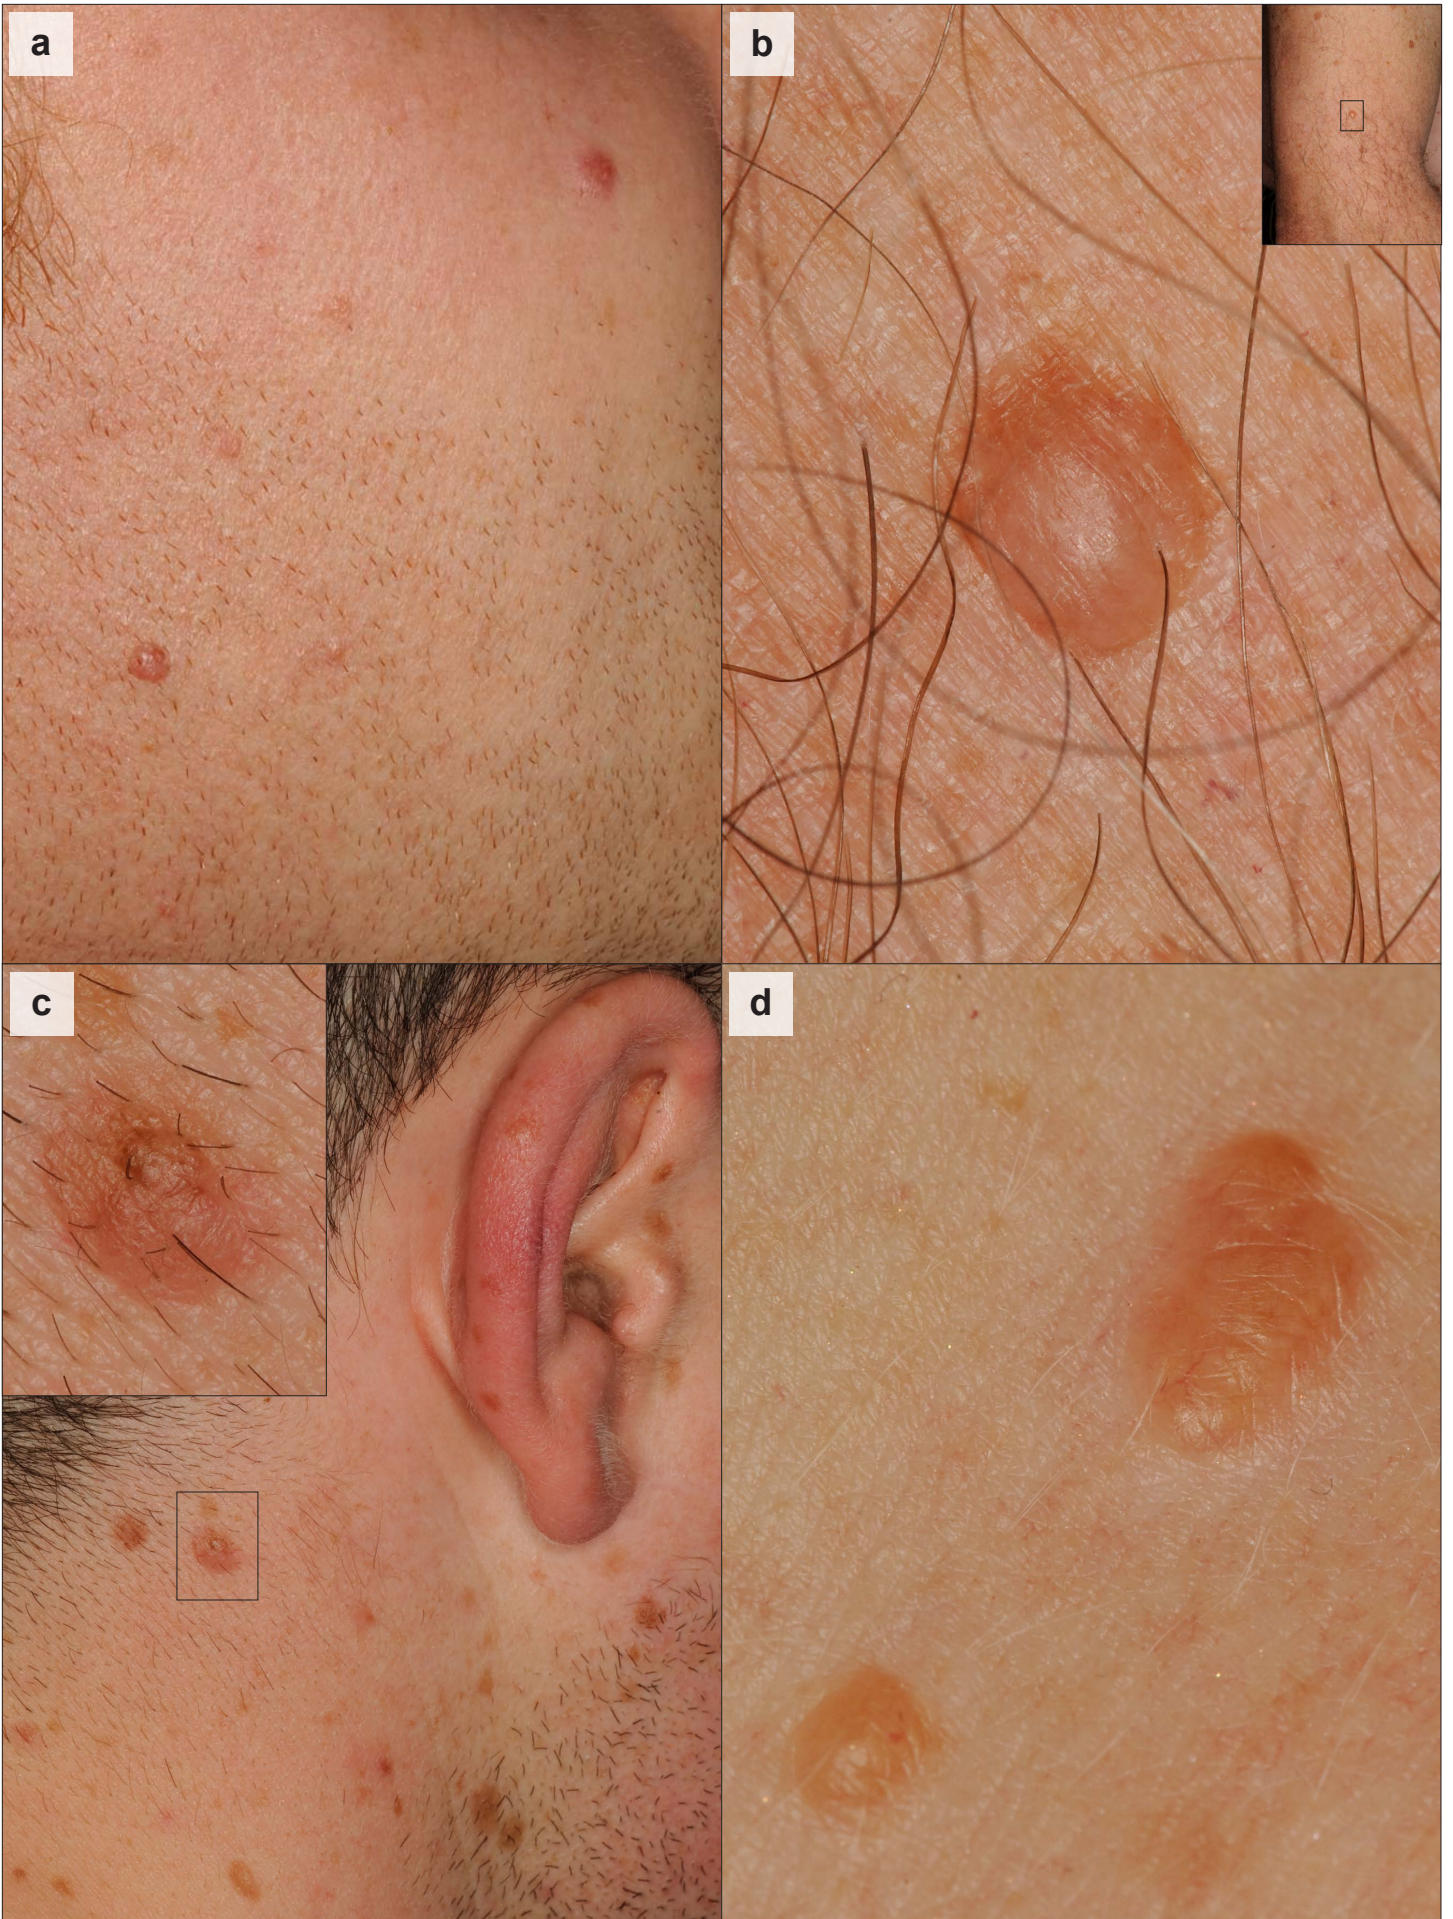



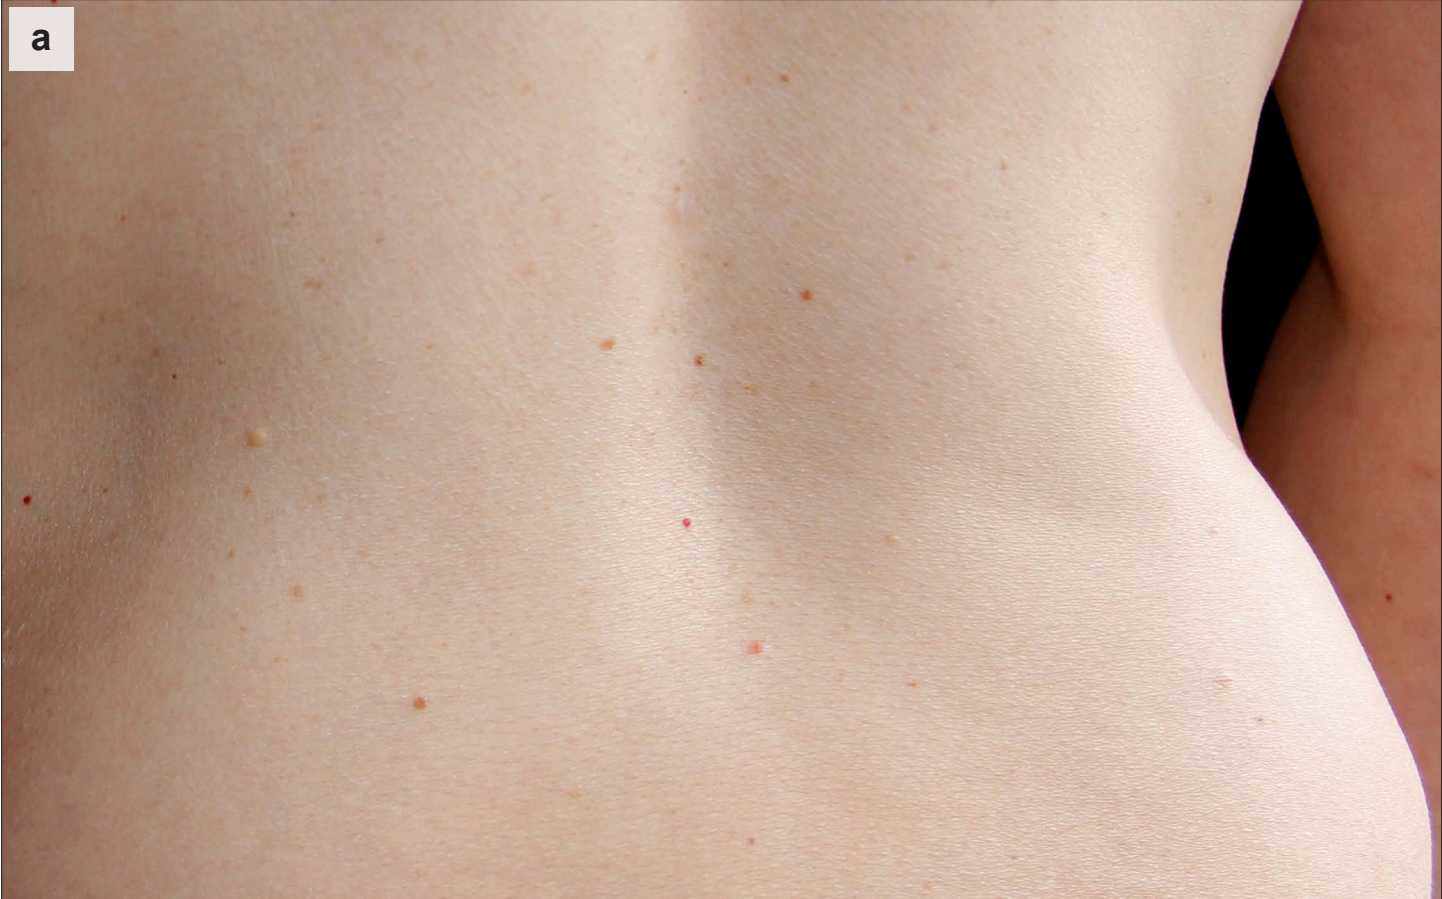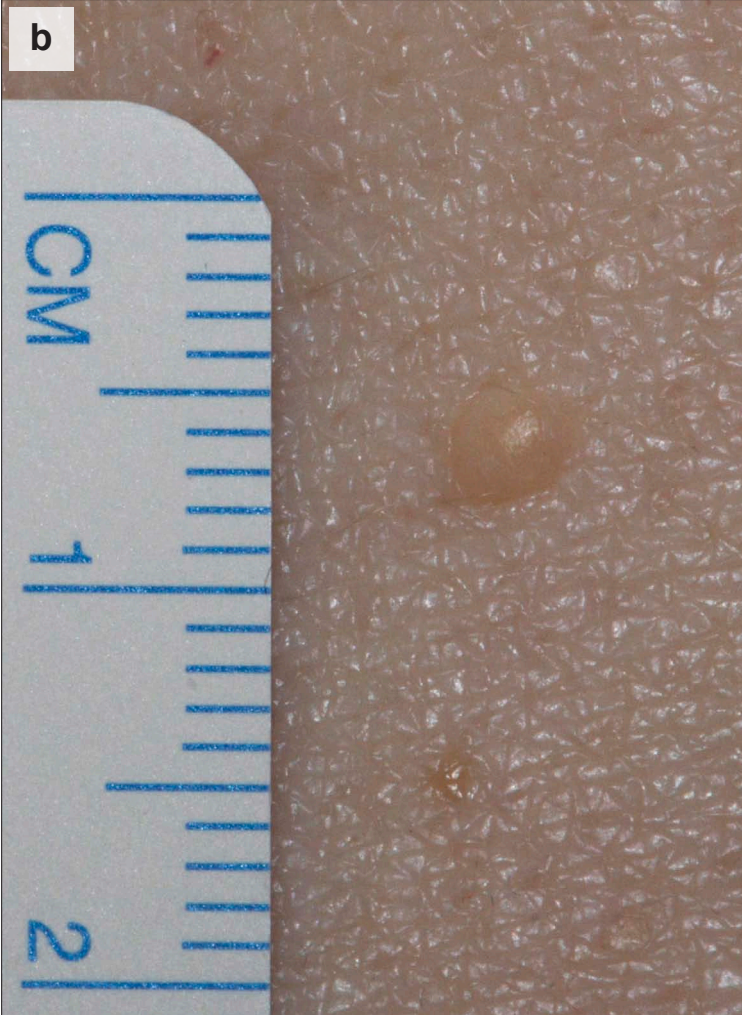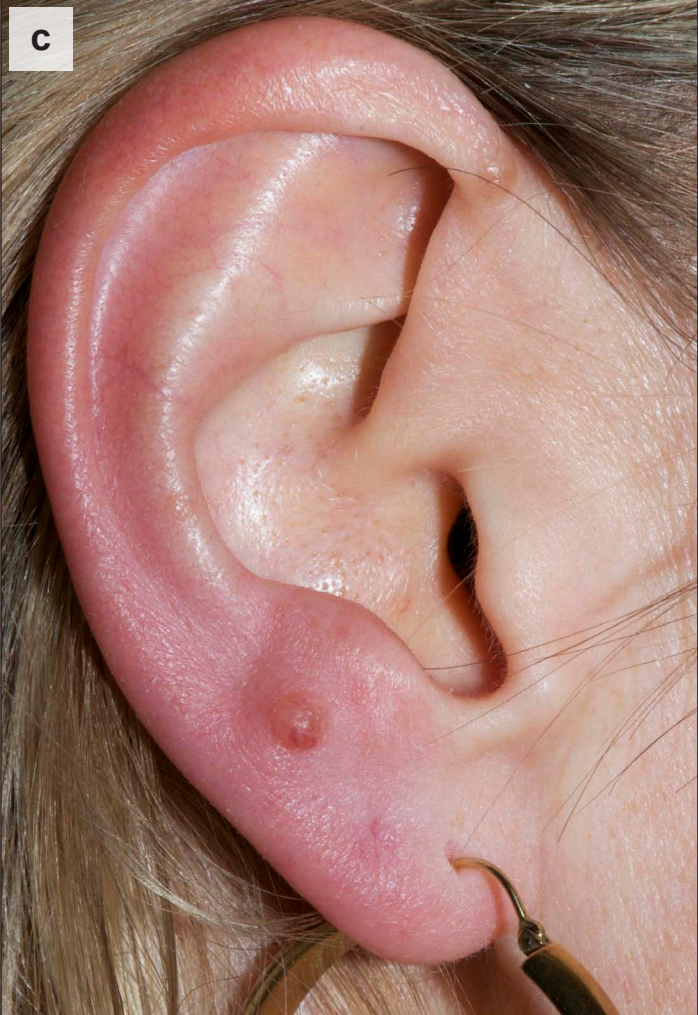

## Supplementary Figure 5

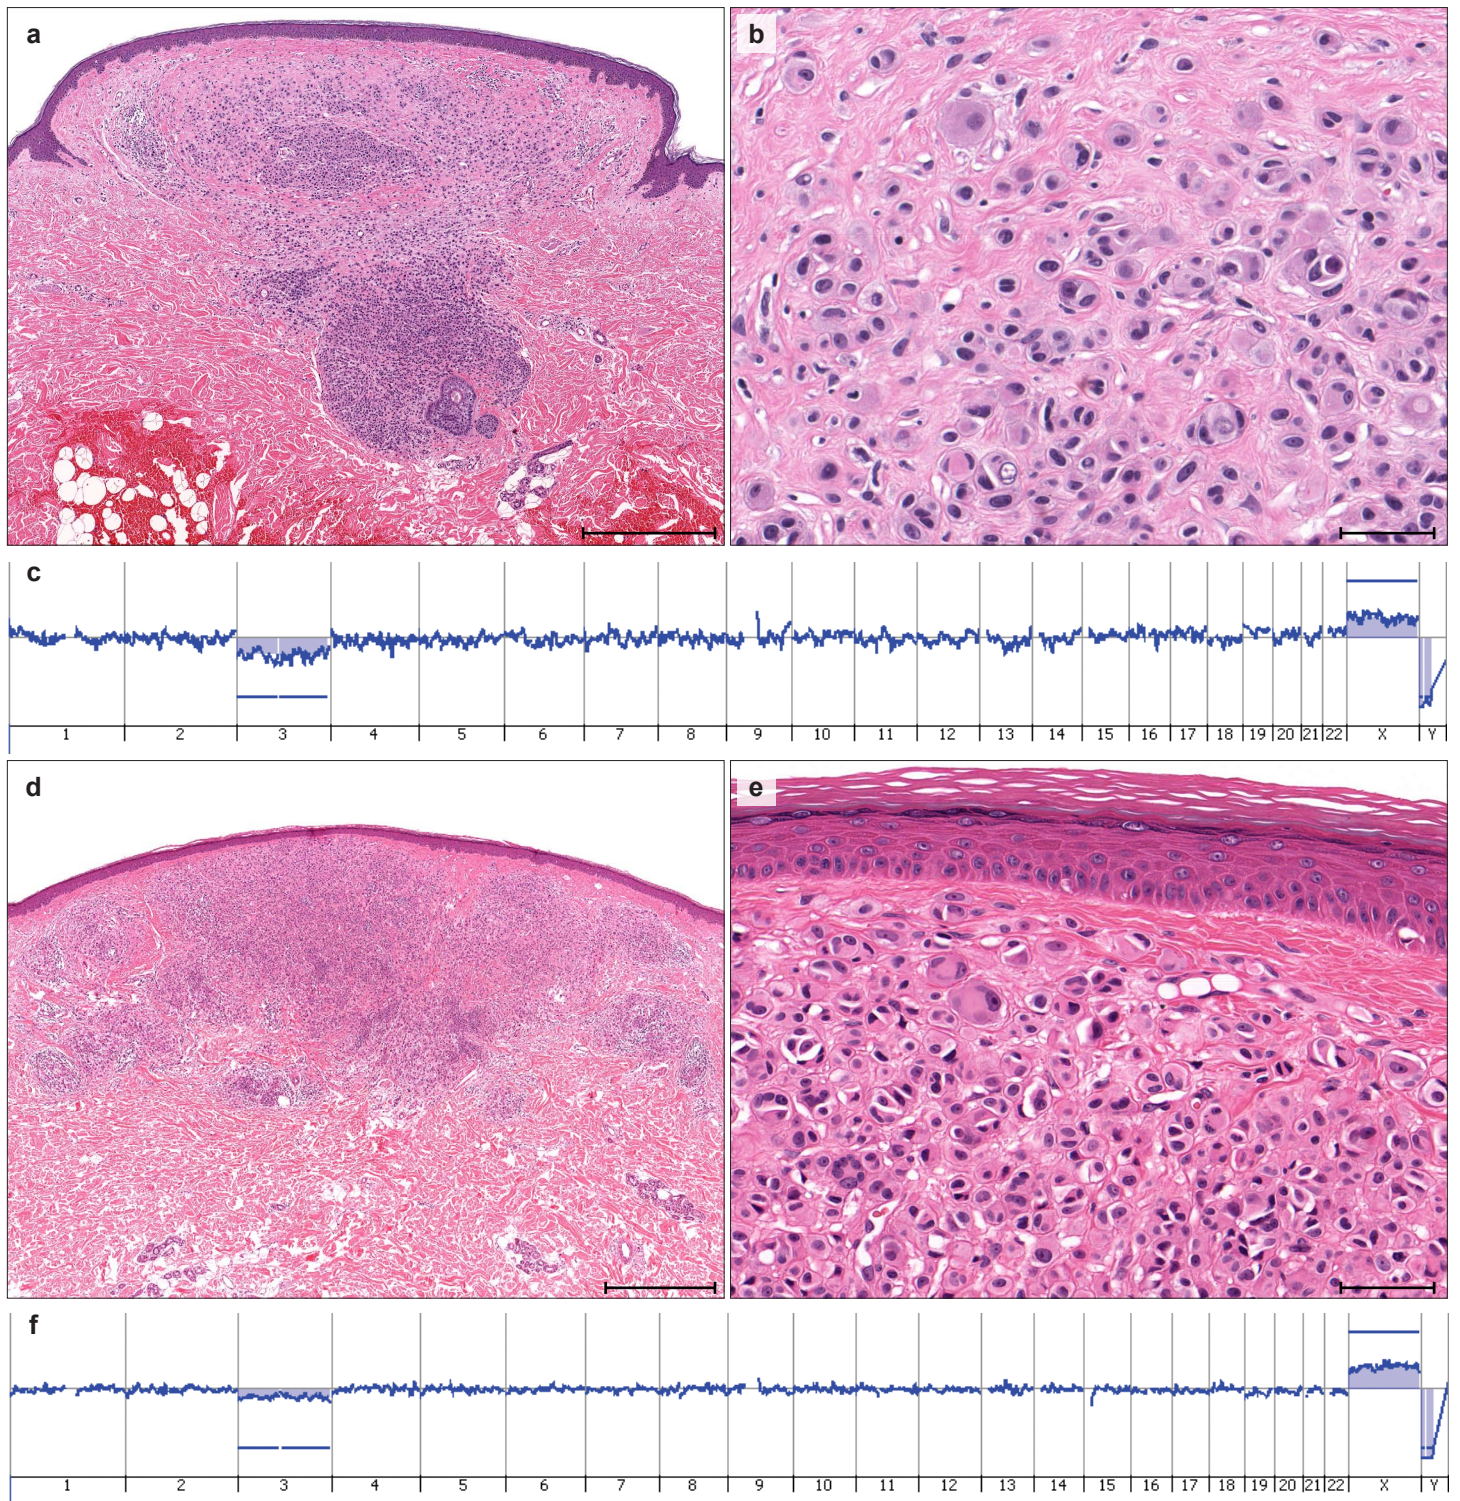

### Supplementary Figure 5. Histopathology of melanocytic tumors with loss of chromosome 3.

(a-c) Tumor #19, patient II-4 (Supplementary Table 2). (a) Intradermal melanocytic tumor. Scale bar, 1 mm. (b) The cytological features of some of the cells were reminiscent of Spitz nevi, however, other characteristic features such as junctional nests of melanocytes with clefts and epidermal hyperplasia were consistently absent. Scale bar, 50  $\mu$ m. (c) The aCGH profile shows a loss of the whole chromosome 3.

(d-f) Tumor #26, patient III-7 (Supplementary Table 2). (d) The dermal melanocytic tumor (scale bar, 1 mm) was composed of (e) epithelioid cells with pleomorphic nuclei (scale bar, 50  $\mu$ m) and (f) showed loss of chromosome 3 in aCGH.

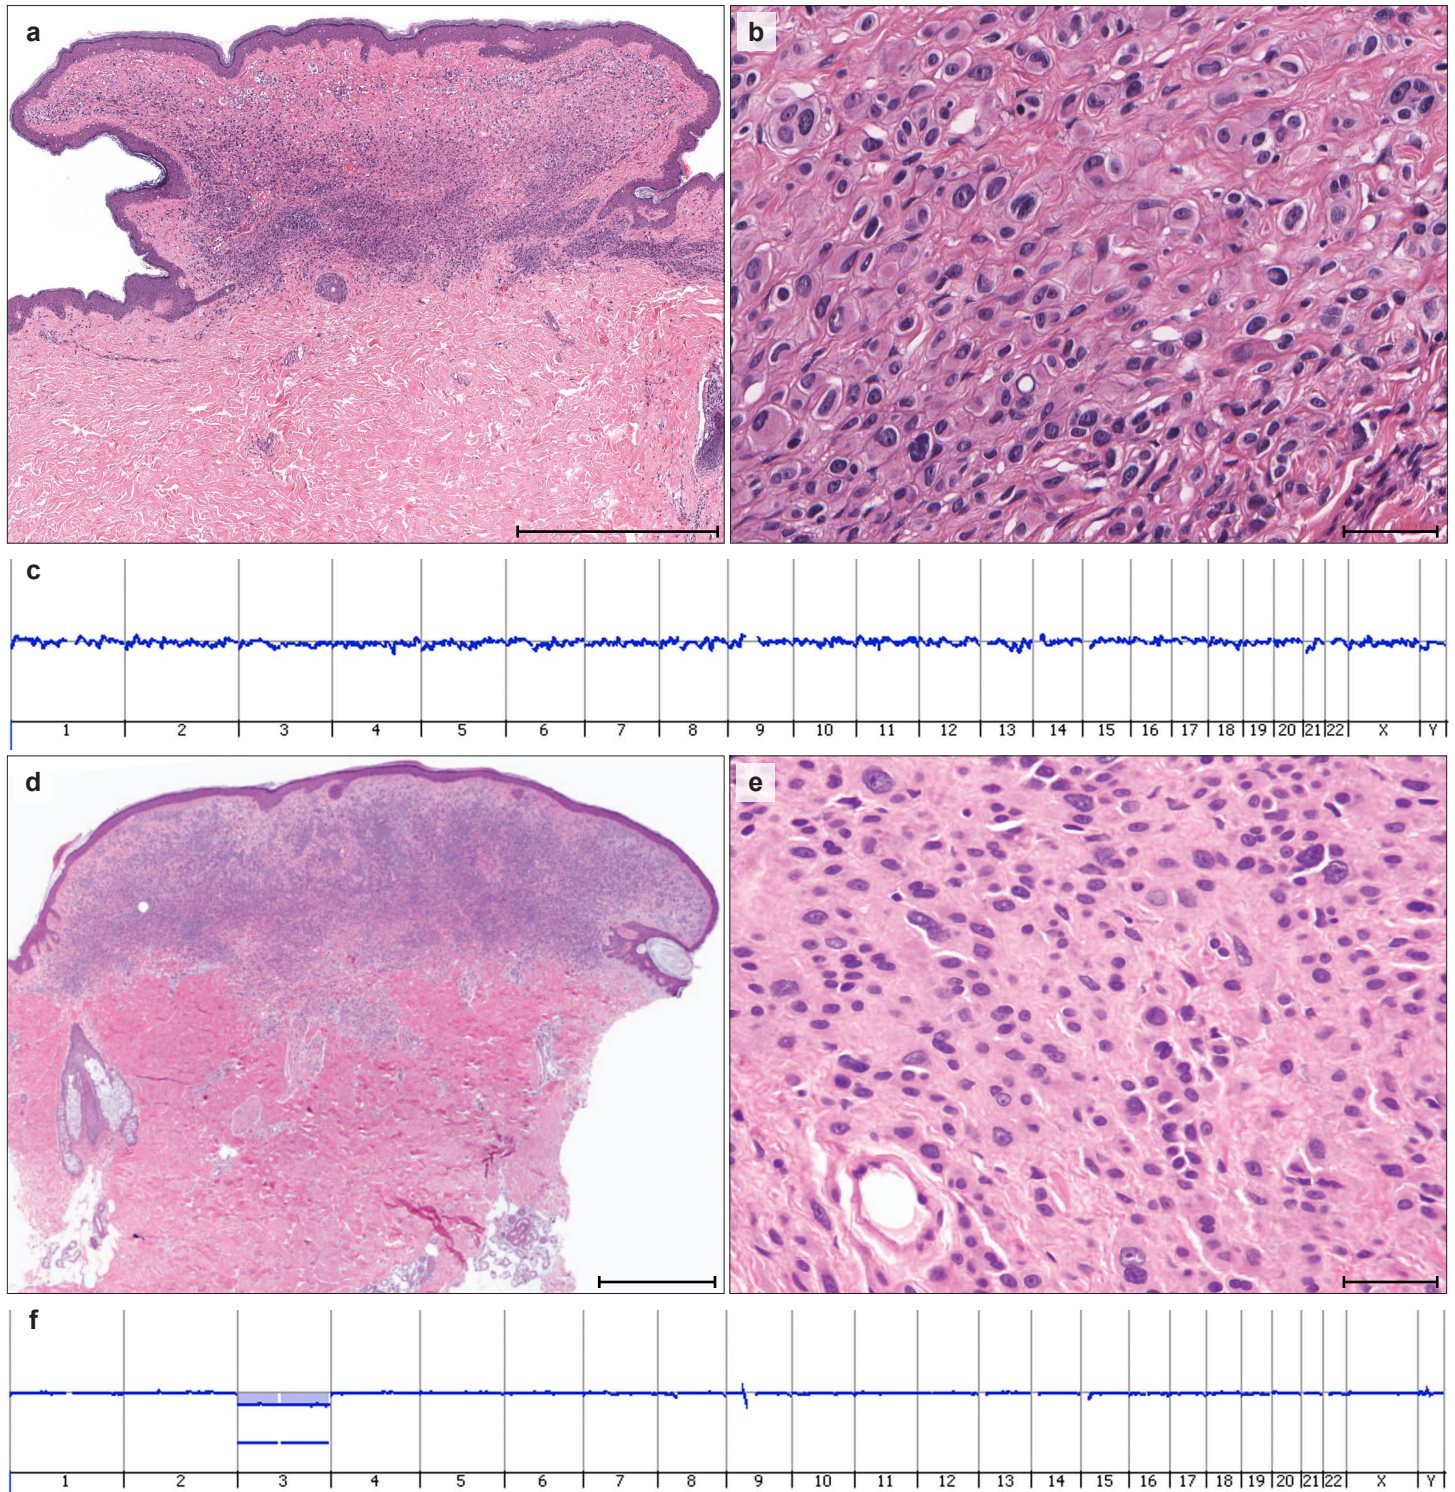

**Supplementary Figure 6. Histopathology of additional representative melanocytic tumors.**

(a-c) Tumor #8, patient II-1 (Supplementary Table 2). (a) The tumor contains areas composed of smaller nevoid melanocytes as seen in common acquired nevi (darker blue regions) and areas with larger epithelioid cells (pale pink regions). Scale bar, 1 mm. (b) Higher magnification shows small melanocytes with oval, monomorphic nuclei and larger epithelioid cells with pleomorphic nuclei. Scale bar, 50  $\mu$ m. (c) The corresponding aCGH profile showed no chromosomal aberrations, but the electropherogram displayed complete loss of the wild-type sequence, indicating maternal uniparental disomy (not shown).

(d-f) Tumor #1, patient III-3 (Supplementary Table 3). (d) The tumor (scale bar, 1 mm) shows a largely symmetrical proliferation (e) of epithelioid melanocytes with pleomorphic nuclei (scale bar, 50  $\mu$ m). There was imperfect maturation, i.e. the melanocytes did not significantly decrease in size with descent into the dermis. (f) The aCGH profile showed a loss of chromosome 3, but no other aberrations.

Supplementary Figure 7

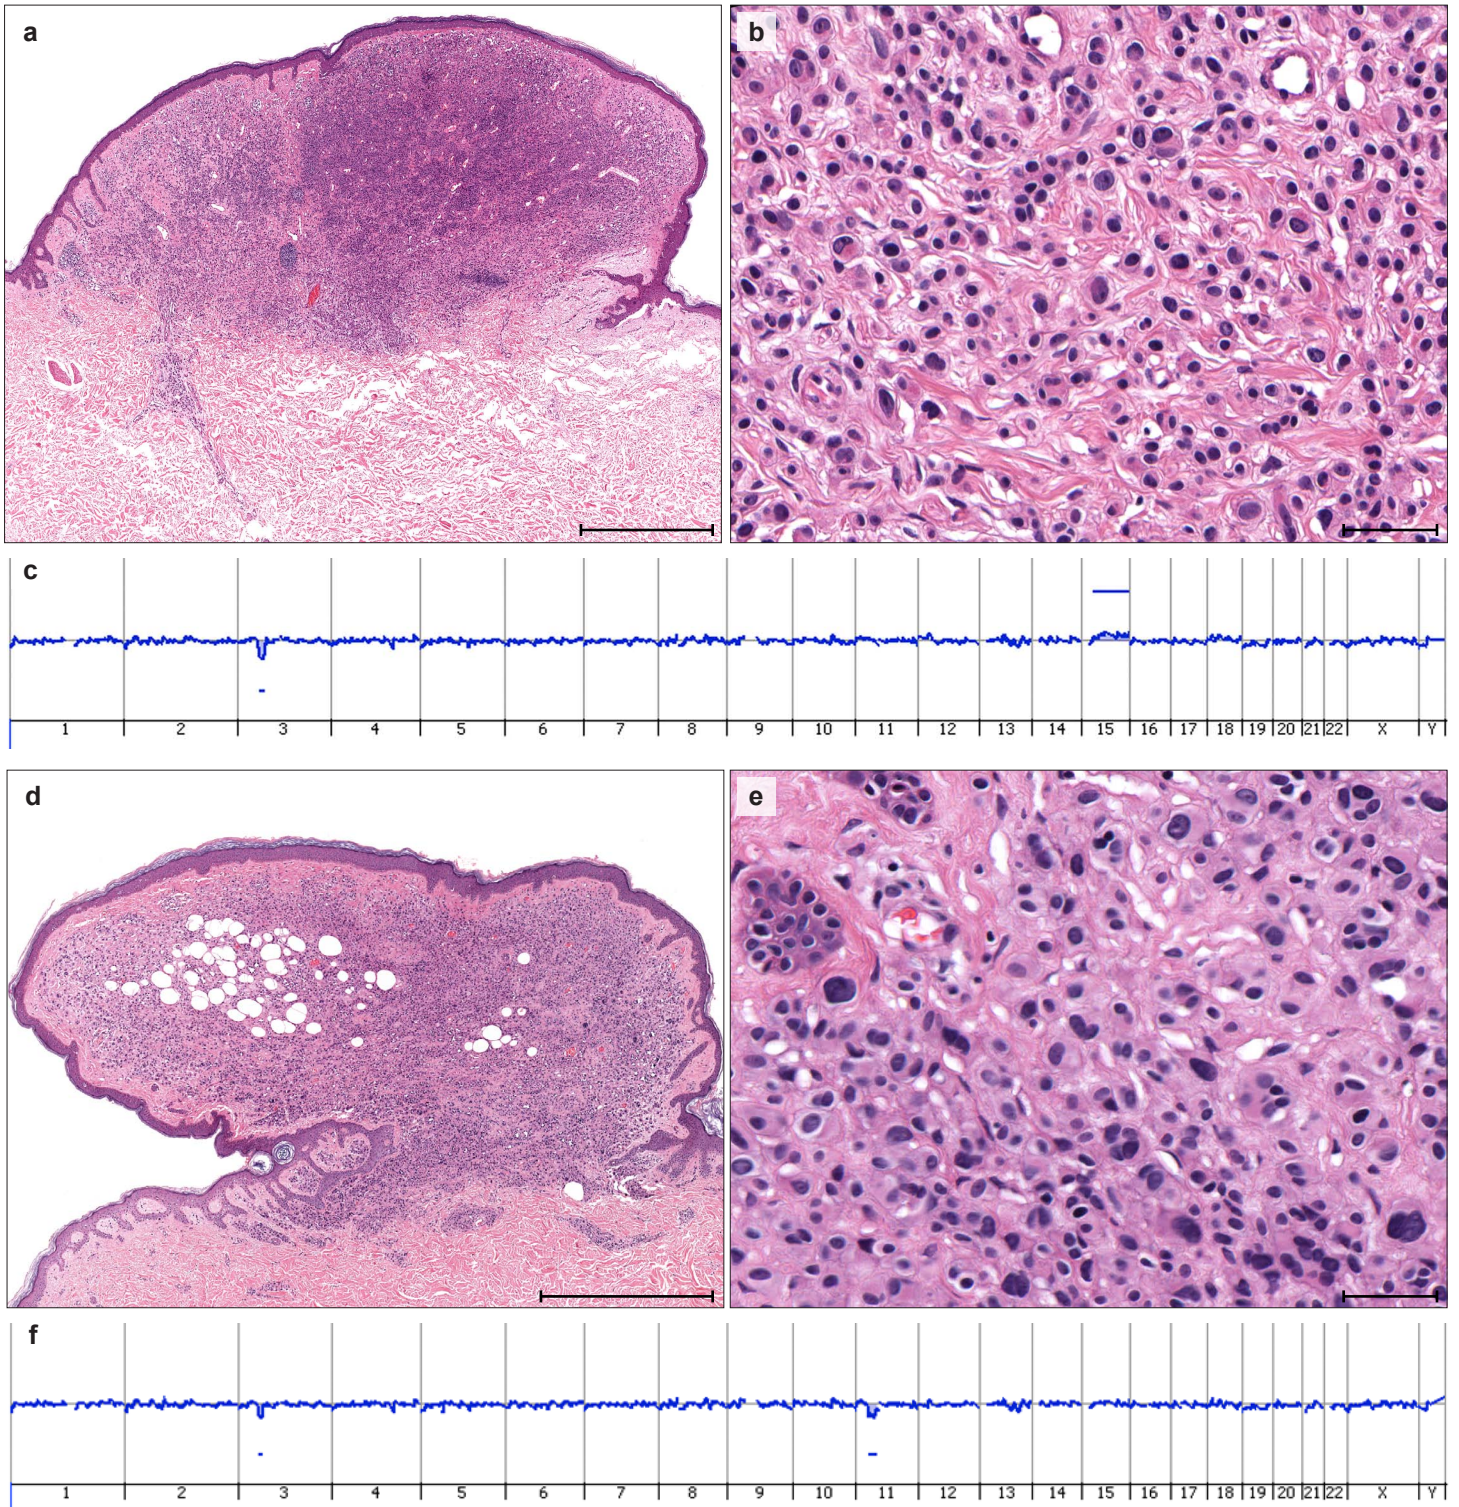

**Supplementary Figure 7. Histopathology of melanocytic tumors that show loss of 3p21 and additional chromosomal aberrations.**

(a-c) Tumor #1, patient II-1 (Supplementary Table 2). (a) The dome shaped tumor (scale bar, 1 mm) showed (b) small melanocytes with oval, monomorphic nuclei and larger epithelioid cells with pleomorphic nuclei. Scale bar, 50 μm. Mitotic figures were scarce. (c) The aCGH profile showed, in addition to the loss of 3p21, a gain of chromosome 15.

(d-f) Tumor #2, patient II-1 (Supplementary Table 2). (d) The polypoid intradermal tumor (scale bar, 1 mm) with admixed adipocytes showed (e) pleomorphic epithelioid melanocytes. Scale bar, 50 μm. (f) The aCGH profile showed two losses: one in chromosome 3p21 and one in chromosome 11.

Supplementary Figure 8

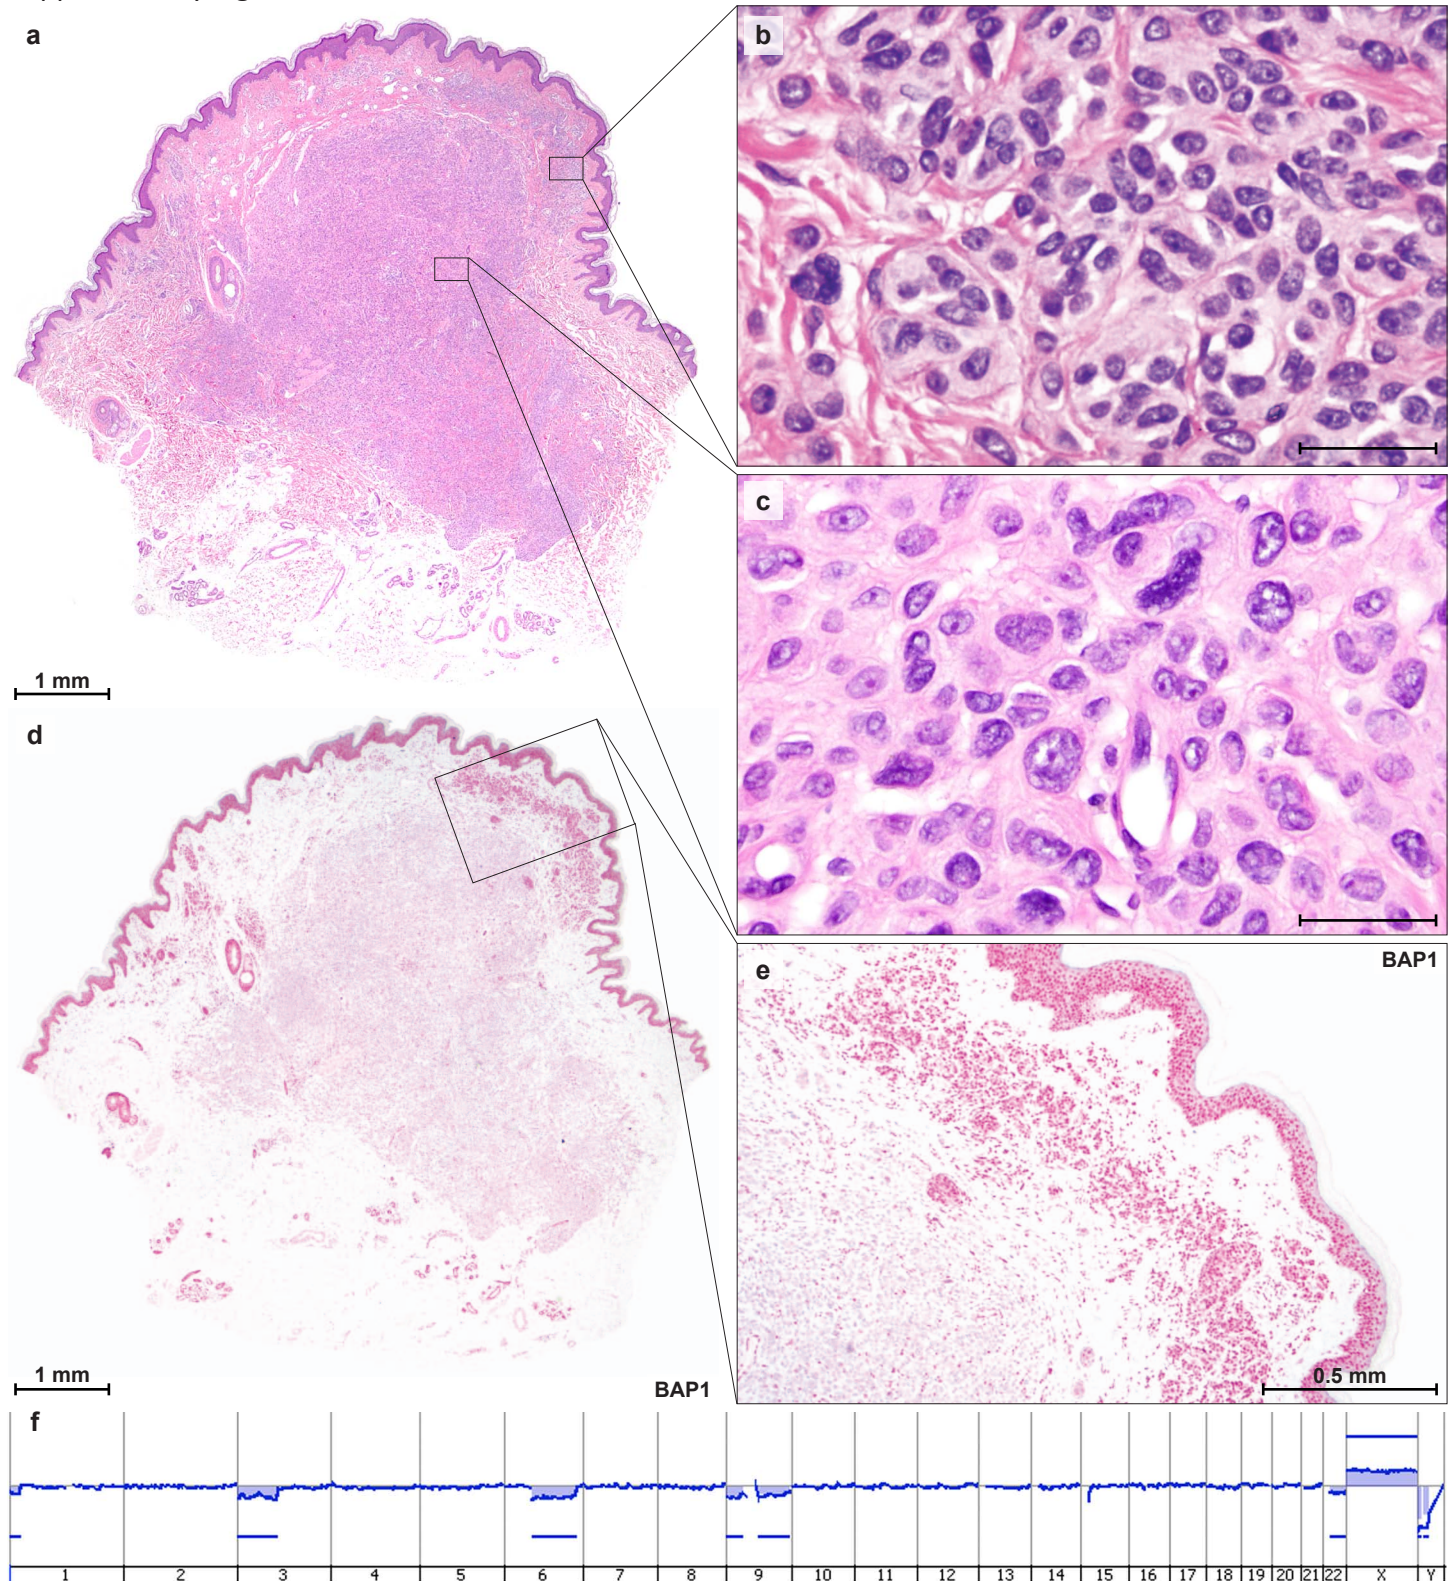

**Supplementary Figure 8. Melanocytic tumor of uncertain malignant potential.**

(a-f) Tumor #8, patient III-2 (Supplementary Table 3). (a) Nodular, asymmetric, predominantly dermal proliferation of (b) small melanocytes in the superficial dermis and (c) large epithelioid melanocytes in the deeper dermis. Scale bar, 50  $\mu$ m) The atypical epithelioid melanocytic cells show considerable nuclear pleomorphism, moderate to large amounts of cytoplasm, and focally prominent nucleoli. One mitotic figure was found. (d, e) Immunohistochemistry of *BAP1* shows no expression in the larger epithelioid cells, but strong nuclear expression in the small melanocytes situated in the superficial dermis. (f) aCGH showed typical chromosomal aberrations seen in melanoma, including losses of chromosomes 1, 3, 6, 9 and 22. The numerous genomic aberrations support the presumption of uncertain malignant potential.

Supplementary Figure 9

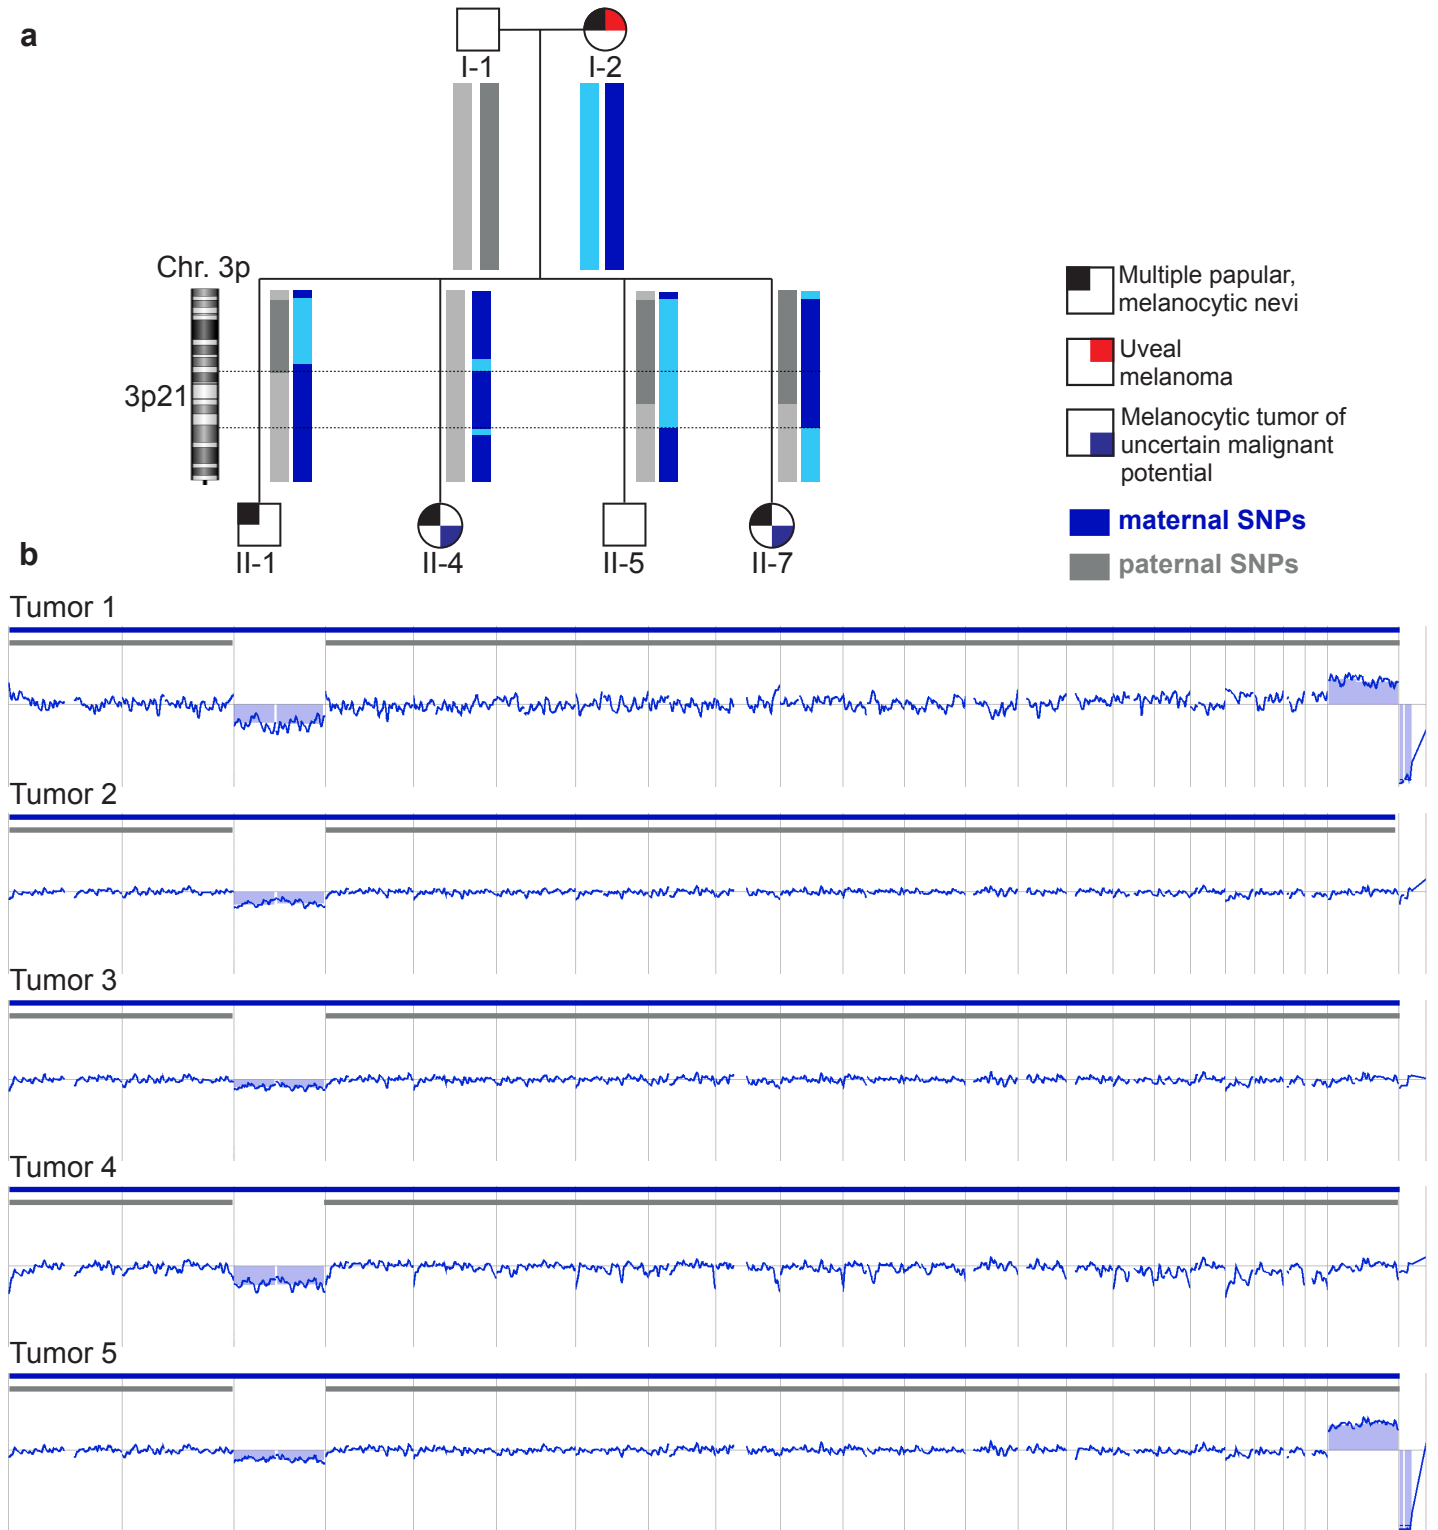

**Supplementary Figure 9. Reconstruction of the haplotypes of 6 members of family 1 and loss of the paternal chromosome 3 in the melanocytic tumors.**

(a) Pedigree of family 1. The haplotypes of the father (I-1) are shown in gray and those of the mother (I-2) in blue. The corresponding haplotypes of their children were reconstructed with the Affymetrix GeneChip Mapping 500K array Nspl chip. Note that all three affected children (II-1, II-4, and II-7) have the same maternal allele for the candidate region (dark blue) whereas the non-affected son (II-5) inherited the other maternal allele (light blue). We were not able to narrow down the candidate region with the genotyping data, because the conjointly inherited 3p21 region overlapped the minimal deleted region in aCGH on both sides by few Mb. (b) SNP-arrays of tumors with chromosome 3 loss illustrated that the paternal copy carrying wild-type allele of *BAP1*, but not the maternal allele harboring the mutated allele was lost.

Supplementary Figure 10

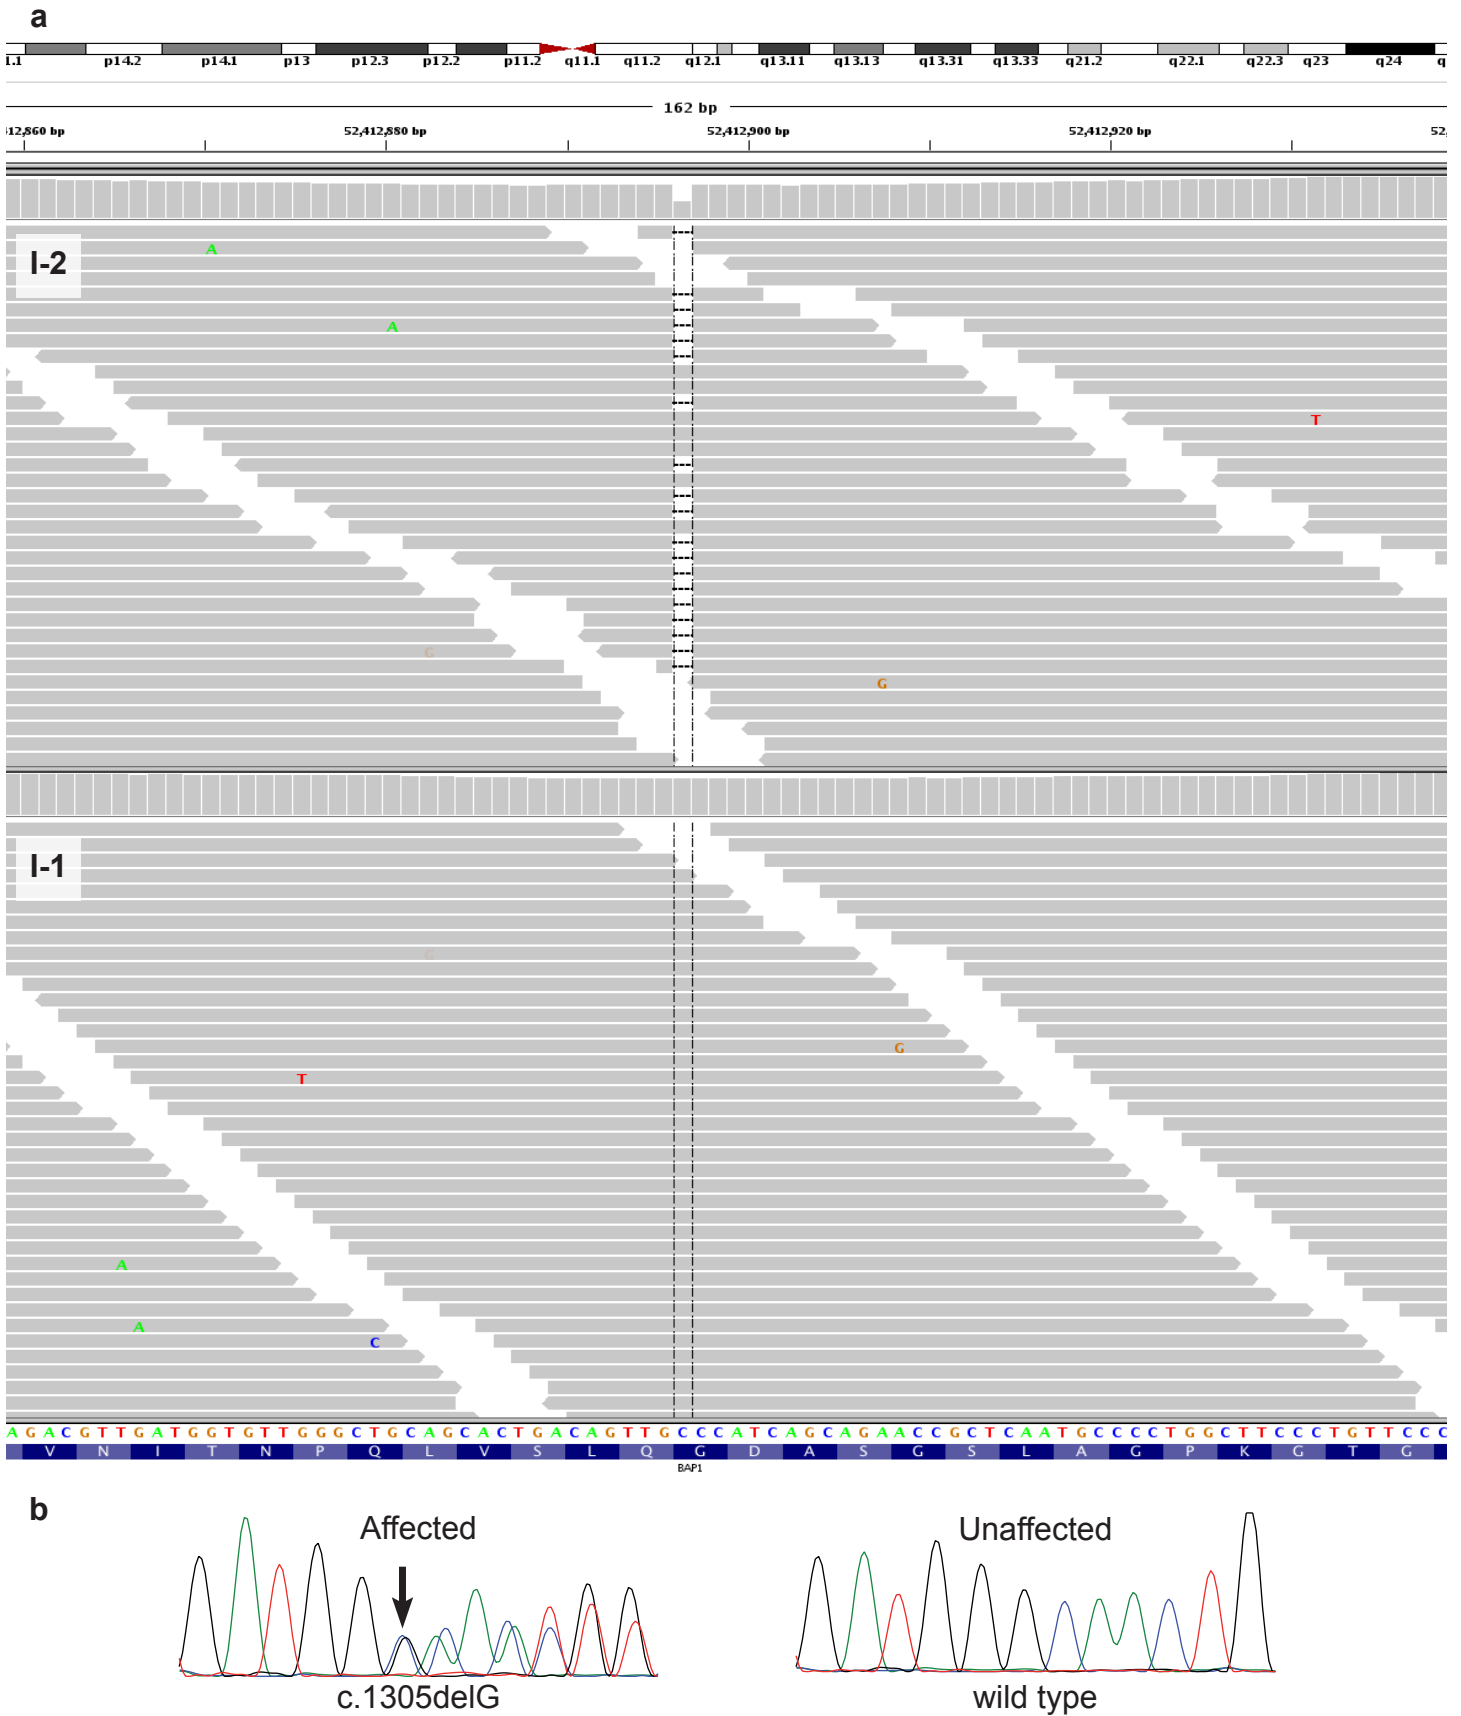

**Supplementary Figure 10. *BAP1* germline mutation in family 1.**

(a) Illustration of the *BAP1* mutation in the Integrative Genomics Viewer (<http://www.broadinstitute.org/igv>). Patient I-2 has a 1 base pair deletion in exon 13 of *BAP1*, which is evident in the sequence reads (gray arrows). The unaffected subject I-1 does not show this deletion. (b) Representative electropherograms from affected and unaffected individuals of family 1.

**a** Loss of chromosome 3

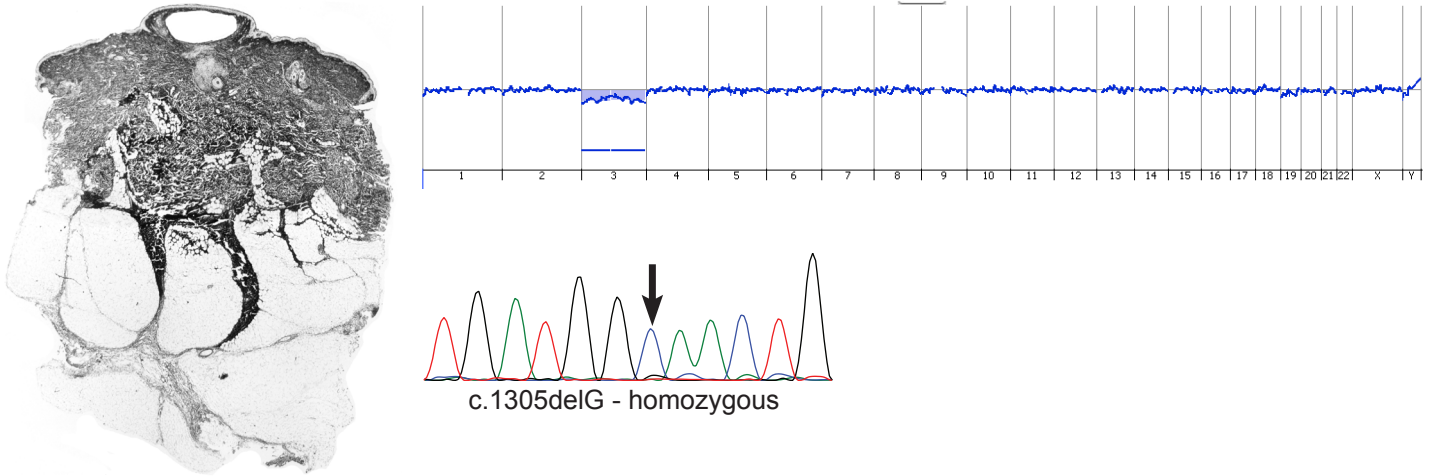

**b** Compound heterozygosity

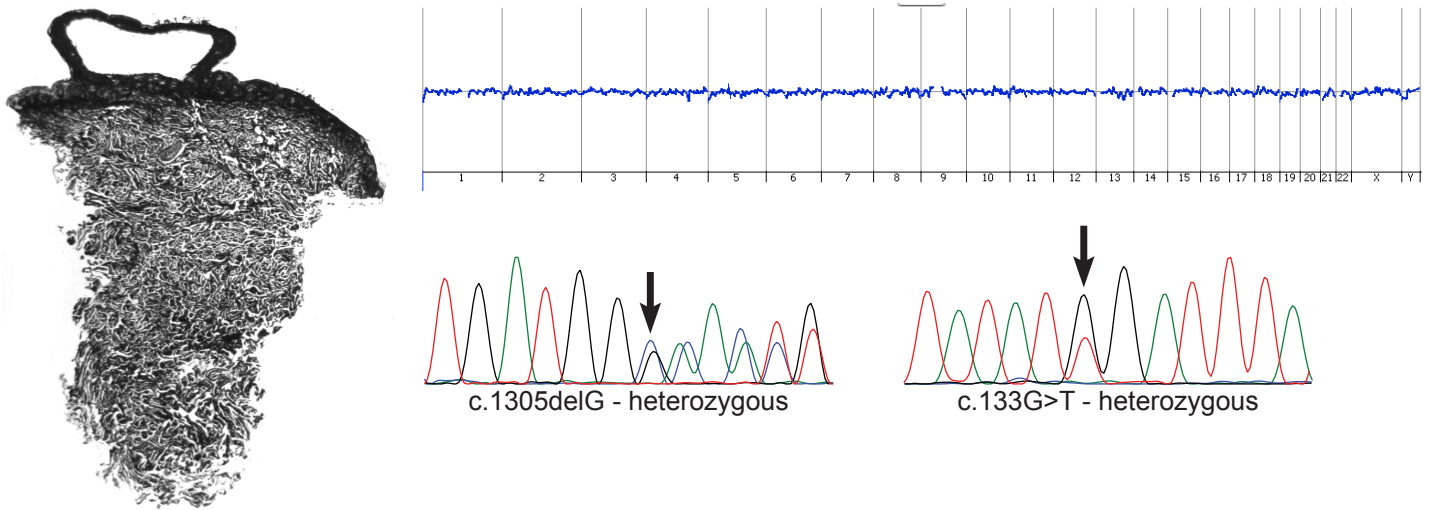

**c** Maternal uniparental disomy

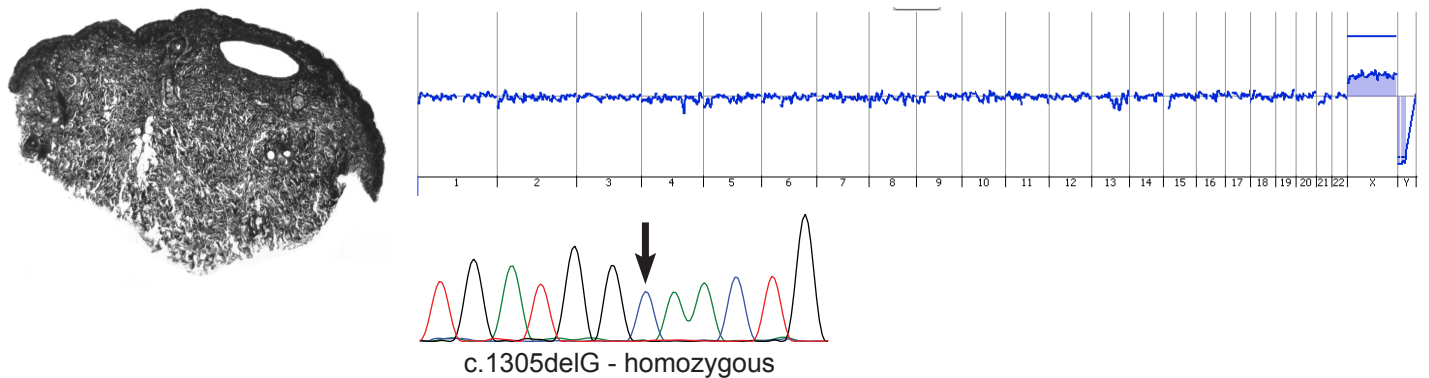

**Supplementary Figure 11. Inactivation of the second *BAP1* allele in three melanocytic tumors by various mechanisms.**

Left panel: Laser-capture microdissection images of histologic sections; right upper panel: aCGH profile; right lower panel: sequencing electropherograms of *BAP1*. **(a)** aCGH shows a loss of chromosome 3 and the sequencing electropherogram indicates a complete loss of the wild type sequence. **(b)** aCGH reveals no copy number changes, but in addition to the germline mutation, a second mutation (c.133G>T, p.Gly45\*) was found. **(c)** Although aCGH shows no loss of 3p21, the electropherogram indicates a complete loss of the wild type sequence indicative of maternal uniparental disomy.



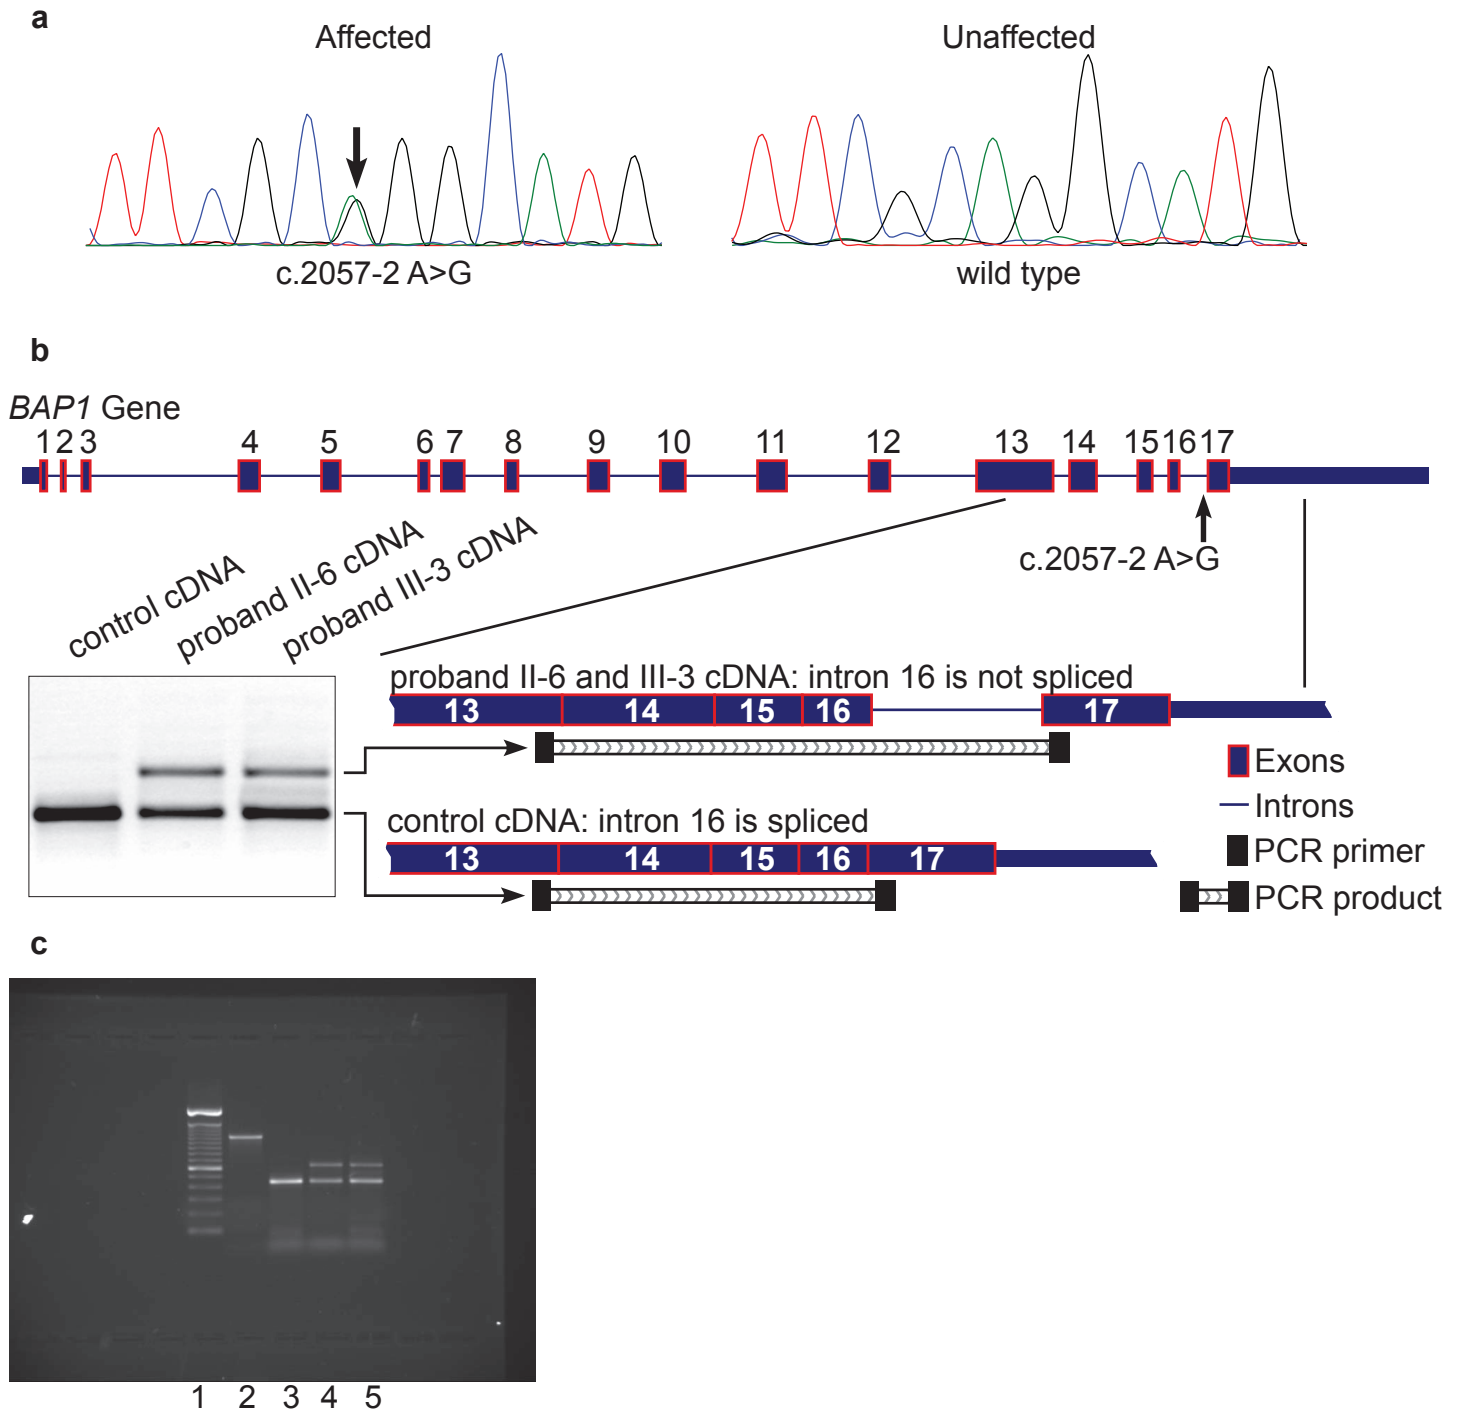

**Supplementary Figure 12. *BAP1* germline mutation in family 2.**

(a) Representative electropherograms from affected and unaffected individuals of family 2. (b) Consequences of *BAP1* mutations on mRNA splicing. Control RNA and RNA from 2 individuals from family 2 (II-6, III-3) was reverse transcribed into cDNA, amplified with PCR primers annealing on exon 13 and 17 (Supplementary Table 9), and separated on a 1% agarose gel. While the PCR product of control cDNA contains only the exons (introns are spliced out) and has the correct predicted size of 355 bp, the PCR products of the two affected patients have two sizes: one is the correctly spliced form (355bp) and the other – as a consequence of the splice site mutation – is an abnormal PCR product of 535 bp (355 + 180 bp of intron 16). (c) Non-cropped, original gel picture of Supplementary Figure 12b. Lane 1: 100bp ladder; Lane 2: PCR product of DNA, which includes all exons and intron between exon 13 and 17 showing an expected size of 1106bp. Lane 3: PCR product of control cDNA with an expected size of 355bp. Lane 4, 5: cDNA from subject II-6 and III-3 showing two PCR products with the expected size of 355bp (normal) and 535 bp (splice site mutation).

Supplementary Figure 13

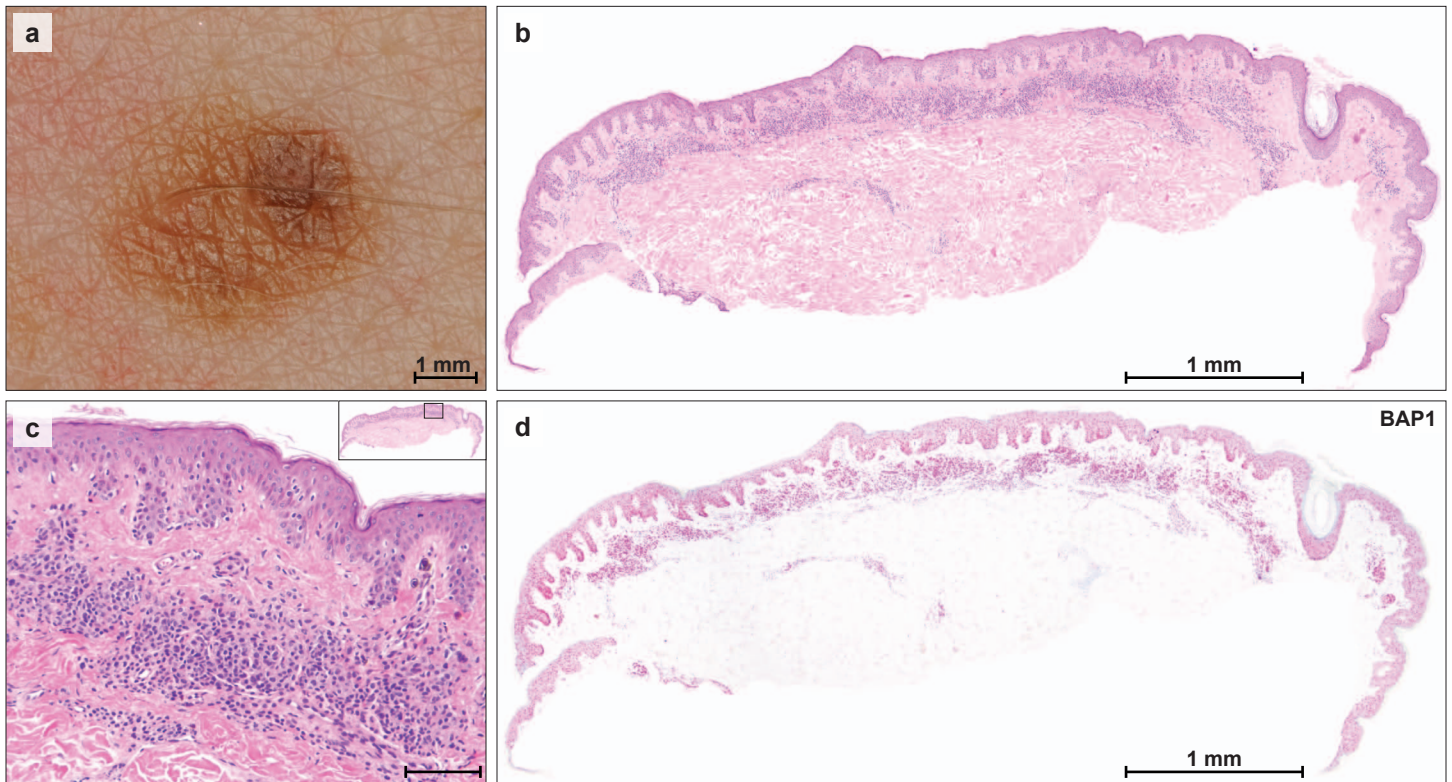

**Supplementary Figure 13. Flat, brown nevi composed of small uniform melanocytes do not show alterations of *BAP1*.**

(a) A small and flat, brown pigmented nevus of patient III-4, family 2. (b) Low magnification shows a band-like proliferation of melanocytes. (c) Higher magnification shows small uniform melanocytes in the dermis and at the dermo-epidermal junction, but no large epithelioid cells. Scale bar, 100  $\mu\text{m}$ . (d) Immunohistochemistry shows strong expression of *BAP1* in the melanocytes. These results suggest that the clinical manifestations of *BAP1* mutated melanocytic neoplasms are usually non-pigmented papules, rather than flat, brown macules.

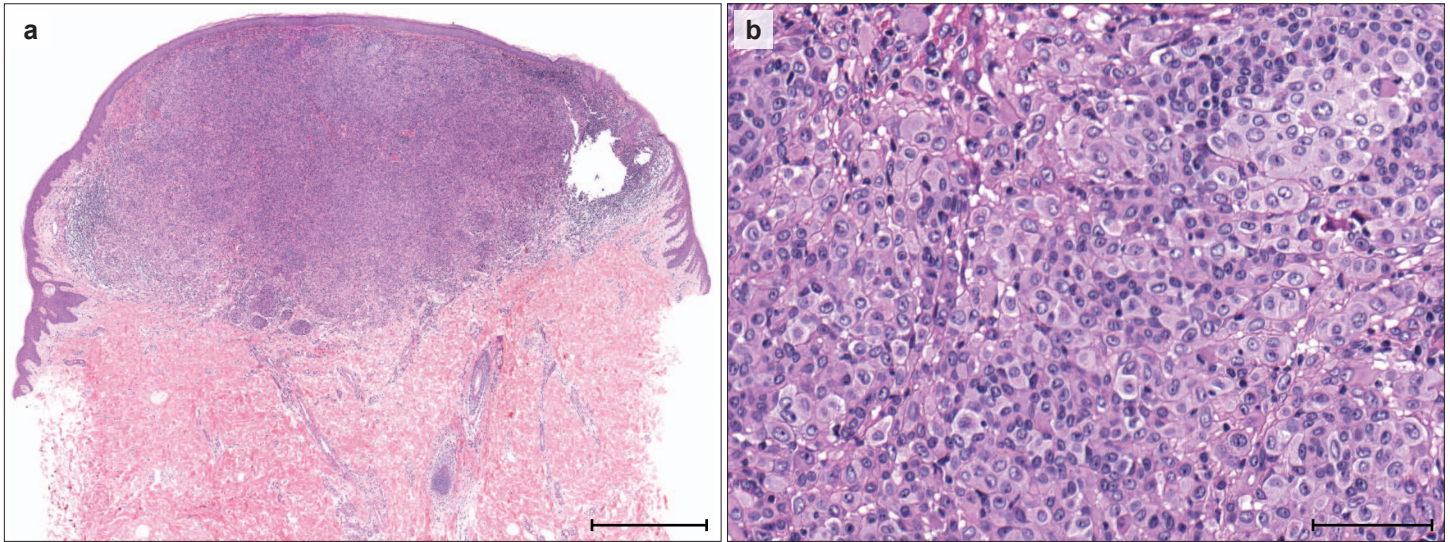

**Supplementary Figure 14. Sporadic atypical Spitz tumor with a somatic acquired *BAP1* mutation.**

(a) Low magnification of an atypical Spitz tumor from a 13-year-old boy (case #2, Supplementary Table 6) showing a relatively symmetrical nodular melanocytic proliferation. No junctional component or epidermal hyperplasia is present. Scale bar, 1 mm. (b) Higher magnification shows large epithelioid melanocytes exhibiting abundant cytoplasm, varying degrees of nuclear pleomorphism, vesicular chromatin, and prominent nucleoli. The histological presentation is very similar to the melanocytic neoplasm observed in the family. Sequencing of *BAP1* revealed a nonsense mutation at codon 590, and a *BRAF* V600E mutation. *BAP1* was not expressed by immunohistochemistry. Scale bar, 100  $\mu$ m.



## Supplementary Tables

**Supplementary Table 1: Clinico-pathological details of melanoma and melanocytic tumors of uncertain malignant potential.**

| Patient         | Age at Diagnosis | Sex | Localization           | Histopathological diagnosis                        | Tumor thickness | Histopathologic features                                                                                                                                                                                                                                                                                                                                                     |
|-----------------|------------------|-----|------------------------|----------------------------------------------------|-----------------|------------------------------------------------------------------------------------------------------------------------------------------------------------------------------------------------------------------------------------------------------------------------------------------------------------------------------------------------------------------------------|
| <b>Family 1</b> |                  |     |                        |                                                    |                 |                                                                                                                                                                                                                                                                                                                                                                              |
| I-2             | 72               | F   | Eye                    | Uveal melanoma                                     | 0.2mm           | Transretinal biopsy. Epithelioid and spindle cells with irregular, vesicular and hyperchromatic nuclei; some cells with pronounced nuclear atypia, pleomorphism, and large nucleoli.                                                                                                                                                                                         |
| II-4            | 46               | F   | Shoulder right ventral | Melanocytic tumor of uncertain malignant potential | 0.8mm           | Asymmetrical proliferation of atypical epithelioid melanocytes in the dermis and focally in the epidermis. Some mitoses. No maturation.                                                                                                                                                                                                                                      |
| II-7            | 34               | F   | Shoulder, left dorsal  | Melanocytic tumor of uncertain malignant potential | 2.9mm           | Relatively symmetrical proliferation of atypical epithelioid melanocytic cells with considerable nuclear pleomorphism. Nucleoli are focally prominent. Also nests of smaller melanocytes with oval nuclei and grayish cytoplasm. Patchy lymphocytic infiltrate. No mitotic figures.                                                                                          |
| <b>Family 2</b> |                  |     |                        |                                                    |                 |                                                                                                                                                                                                                                                                                                                                                                              |
| II-1            | 44               | M   | Eye                    | Uveal melanoma                                     | 1.5mm           | Large, pigmented tumor cells with vesicular nuclei and prominent nucleoli. Predominantly epithelioid cells. Tumor infiltration of the sclera.                                                                                                                                                                                                                                |
| II-3            | 50               | M   | Right back             | Melanoma                                           | 1.6mm           | Melanoma arising in association with a dysplastic nevus. Focally superficial spreading pattern. Areas of lymphocytic infiltration and sclerosis.                                                                                                                                                                                                                             |
| II-3            | 62               | M   | Upper left arm         | Melanocytic tumor of uncertain malignant potential | 0.7mm           | Shave biopsy. Asymmetrical proliferation of moderately atypical epithelioid and oval melanocytes in nests and in single cell formation at the dermo-epidermal junction and in the dermis. Foci of inflammation and fibrosis.                                                                                                                                                 |
| III-2*          | 31               | F   | Lower right arm        | Melanocytic tumor of uncertain malignant potential | 4.9mm           | Nodular, predominantly dermal proliferation with a predominant population of atypical epithelioid melanocytic cells with considerable nuclear pleomorphism and moderate to large amounts of cytoplasm. Nucleoli are focally prominent. A few smaller nevocellular melanocytes, with oval nuclei and scant cytoplasm, situated in the superficial dermis. No mitotic figures. |
| II-6            | 38               | F   | Dorsum of foot         | Melanoma                                           | 3.9mm           | Ulcerated tumor composed of highly atypical melanocytes with highly pleomorphic nuclei. Mitoses.                                                                                                                                                                                                                                                                             |
| II-6            | 52               | F   | Inguinal               | Lymph node metastasis                              | 45mm (size)     | Bulky metastasis extensively replacing lymph node, exhibiting central necrosis. Highly pleomorphic epithelioid melanocytes with abundant eosinophilic cytoplasm, prominent nucleoli and frequent mitoses.                                                                                                                                                                    |
| III-3           | 39               | M   | Left parietal          | Melanoma                                           | 0.3mm           | Biopsy. Atypical melanocytes in single cell formations and in nests with different size and shape.                                                                                                                                                                                                                                                                           |
| III-3           | 40               | M   | Right parietal         | Melanocytic tumor of uncertain malignant potential | n.a.            | Atypical melanocytic proliferation in sun-damaged skin.                                                                                                                                                                                                                                                                                                                      |

n.a. not available, \*tumor shown in **Supplementary Figure 8**

**Supplementary Table 2: *BAP1* status in melanocytic tumors of family 1.**

| Patient | #              | Localization | Histology   | <i>BAP1</i> |           | Predicted functional consequences | 3p21 loss in aCGH | <i>BRAF</i> V600E |
|---------|----------------|--------------|-------------|-------------|-----------|-----------------------------------|-------------------|-------------------|
|         |                |              |             | Allele      | Status    |                                   |                   |                   |
| II-1    | 1 <sup>1</sup> | upper back   | combined    | A           | c.1305del | p.Gln436Asnfs*135                 | +                 | +                 |
|         |                |              |             | B           | loss      |                                   |                   |                   |
|         | 2 <sup>2</sup> | upper back   | combined    | A           | c.1305del | p.Gln436Asnfs*135                 | +                 | wt                |
|         |                |              |             | B           | loss      |                                   |                   |                   |
|         | 3              | upper back   | combined    | A           | c.1305del | p.Gln436Asnfs*135                 | +                 | +                 |
|         |                |              |             | B           | loss      |                                   |                   |                   |
|         | 4              | upper arm    | epithelioid | A           | c.1305del | p.Gln436Asnfs*135<br>p.Gly45*     | -                 | +                 |
|         |                |              |             | B           | c.133G>T  |                                   |                   |                   |
|         | 5              | upper arm    | epithelioid | A           | c.1305del | p.Gln436Asnfs*135                 | +                 | +                 |
|         |                |              |             | B           | loss      |                                   |                   |                   |
|         | 6              | upper arm    | epithelioid | A           | c.1305del | p.Gln436Asnfs*135                 | -                 | +                 |
|         |                |              |             | B           | UPD       |                                   |                   |                   |
|         | 7              | upper back   | epithelioid | A           | c.1305del | p.Gln436Asnfs*135                 | +                 | +                 |
|         |                |              |             | B           | loss      |                                   |                   |                   |
|         | 8 <sup>3</sup> | upper back   | combined    | A           | c.1305del | p.Gln436Asnfs*135                 | -                 | +                 |
|         |                |              |             | B           | UPD       |                                   |                   |                   |
|         | 9              | shoulder     | epithelioid | A           | c.1305del | p.Gln436Asnfs*135<br>p.Gln590*    | -                 | +                 |
|         |                |              |             | B           | c.1768C>T |                                   |                   |                   |
|         | 10             | upper arm    | epithelioid | A           | c.1305del | p.Gln436Asnfs*135                 | -                 | +                 |
|         |                |              |             | B           | UPD       |                                   |                   |                   |
|         | 11             | neck         | epithelioid | A           | c.1305del | p.Gln436Asnfs*135                 | +                 | +                 |
|         |                |              |             | B           | loss      |                                   |                   |                   |
|         | 12             | lower back   | epithelioid | A           | c.1305del | p.Gln436Asnfs*135                 | +                 | +                 |
|         |                |              |             | B           | loss      |                                   |                   |                   |
|         | 13             | knee dorsal  | epithelioid | A           | c.1305del | p.Gln436Asnfs*135                 | +                 | +                 |
|         |                |              |             | B           | loss      |                                   |                   |                   |
|         | 14             | knee dorsal  | epithelioid | A           | c.1305del | p.Gln436Asnfs*135                 | +                 | +                 |
|         |                |              |             | B           | loss      |                                   |                   |                   |
|         | 15             | shoulder     | epithelioid | A           | c.1305del | p.Gln436Asnfs*135                 | n.a.              | +                 |
|         |                |              |             | B           | loss/UPD  |                                   |                   |                   |
|         | 16             | lower back   | epithelioid | A           | c.1305del | p.Gln436Asnfs*135                 | n.a.              | +                 |
|         |                |              |             | B           | wt        |                                   |                   |                   |
|         | 17             | knee ventral | epithelioid | A           | c.1305del | p.Gln436Asnfs*135                 | n.a.              | wt                |
|         |                |              |             | B           | wt        |                                   |                   |                   |
|         | 18             | lower leg    | epithelioid | A           | c.1305del | p.Gln436Asnfs*135                 | n.a.              | +                 |
|         |                |              |             | B           | loss/UPD  |                                   |                   |                   |

**Supplementary Table 2 (continued).**

| Patient     | #               | Localization | Histology      | <i>BAP1</i> |           | Predicted functional consequences | 3p21 loss in aCGH | <i>BRAF</i> V600E |
|-------------|-----------------|--------------|----------------|-------------|-----------|-----------------------------------|-------------------|-------------------|
|             |                 |              |                | Allele      | Status    |                                   |                   |                   |
| <b>II-4</b> | 19 <sup>4</sup> | shoulder     | epithelioid    | A           | c.1305del | p.Gln436Asnfs*135                 | +                 | +                 |
|             |                 |              |                | B           | loss      |                                   |                   |                   |
|             | 20              | upper arm    | epithelioid    | A           | c.1305del | p.Gln436Asnfs*135                 | -                 | +                 |
|             |                 |              |                | B           | wt        |                                   |                   |                   |
|             | 21              | lower arm    | epithelioid    | A           | c.1305del | p.Gln436Asnfs*135                 | -                 | +                 |
|             |                 |              |                | B           | wt        |                                   |                   |                   |
|             | 22              | upper back   | epithelioid    | A           | c.1305del | p.Gln436Asnfs*135                 | -                 | wt                |
|             |                 |              |                | B           | UPD       |                                   |                   |                   |
|             | 23              | lower arm    | epithelioid    | A           | c.1305del | p.Gln436Asnfs*135                 | n.a.              | +                 |
|             |                 |              |                | B           | loss/UPD  |                                   |                   |                   |
|             | 24              | lower back   | epithelioid    | A           | c.1305del | p.Gln436Asnfs*135                 | n.a.              | +                 |
|             |                 |              |                | B           | wt        |                                   |                   |                   |
|             | 25              | ear          | combined       | A           | c.1305del | p.Gln436Asnfs*135                 | n.a.              | +                 |
|             |                 |              |                | B           | c.1145dup |                                   |                   |                   |
| <b>II-7</b> | 26 <sup>5</sup> | shoulder     | epithelioid    | A           | c.1305del | p.Gln436Asnfs*135                 | +                 | +                 |
|             |                 |              |                | B           | loss      |                                   |                   |                   |
|             | 27              | upper arm    | epithelioid    | A           | c.1305del | p.Gln436Asnfs*135                 | -                 | +                 |
|             |                 |              |                | B           | UPD       |                                   |                   |                   |
|             | 28              | upper arm    | epithelioid    | A           | c.1305del | p.Gln436Asnfs*135                 | -                 | +                 |
|             |                 |              |                | B           | c.901G>A  |                                   |                   |                   |
|             | 29              | upper arm    | combined       | A           | c.1305del | p.Gln436Asnfs*135                 | -                 | +                 |
|             |                 |              |                | B           | UPD       |                                   |                   |                   |
| <b>I-2</b>  | 30 <sup>6</sup> | eye          | uveal melanoma | A           | c.1305del | p.Gln436Asnfs*135                 | +                 | wt                |
|             |                 |              |                | B           | loss      |                                   |                   |                   |

wt: wild type; n.a.: not available

epithelioid: melanocytic tumor composed of cells with epithelioid morphology.

combined: melanocytic tumor composed predominately of epithelioid cells and some admixed nevoid cells.

UPD: uniparental disomy of maternal sequences, as assessed by markedly suppressed residual wild type sequences in the electropherograms, but no loss of 3p21 in aCGH.

UPD/loss: analysis of the electropherograms indicated a loss of the wild type allele, but differentiation between UPD and loss of 3p21 was not possible, because aCGH was not performed.

+: loss of the 3p21 region or *BRAF* V600E mutation, -: no loss of 3p21

<sup>1</sup>tumor is shown in **Supplementary Figure 7a-c**.

<sup>2</sup>tumor is shown in **Supplementary Figure 7d-f**.

<sup>3</sup>tumor is shown in **Supplementary Figure 6a-c**.

<sup>4</sup>tumor is shown in **Supplementary Figure 5a-c**.

<sup>5</sup>tumor is shown in **Supplementary Figure 5d-f**.

<sup>6</sup>harbors a *GNAQ* mutation (c.626A>C, p.Gln209Pro).

**Supplementary Table 3: *BAP1* status in melanocytic tumors of family 2.**

| Patient | #               | Localization         | Histology          | <i>BAP1</i>  |                  | Predicted functional consequences | 3p21 loss in | <i>BRAF</i> V600E |
|---------|-----------------|----------------------|--------------------|--------------|------------------|-----------------------------------|--------------|-------------------|
|         |                 |                      |                    | Allele       | Status           |                                   |              |                   |
| III-3   | 1 <sup>1</sup>  | neck                 | combined           | A            | c.2057-2 A>G     | p.Met687Glufs*28                  | +            | +                 |
|         |                 |                      |                    | B            | loss             |                                   |              |                   |
|         | 2               | occipital            | epithelioid        | A            | c.2057-2 A>G     | p.Met687Glufs*28                  | n.a.         | +                 |
|         |                 |                      |                    | B            | loss/UPD         |                                   |              |                   |
|         | 3               | upper back           | epithelioid        | A            | c.2057-2 A>G     | p.Met687Glufs*28                  | n.a.         | +                 |
|         |                 |                      |                    | B            | loss/UPD         |                                   |              |                   |
|         | 4               | upper back           | epithelioid        | A            | c.2057-2 A>G     | p.Met687Glufs*28                  | n.a.         | +                 |
|         |                 |                      |                    | B            | loss/UPD         |                                   |              |                   |
|         | 5 <sup>2</sup>  | upper arm            | combined           | A            | c.2057-2 A>G     | p.Met687Glufs*28                  | +            | +                 |
|         |                 |                      |                    | B            | loss             |                                   |              |                   |
| 6       | upper arm       | epithelioid          | A                  | c.2057-2 A>G | p.Met687Glufs*28 | -                                 | +            |                   |
|         |                 |                      | B                  | UPD          |                  |                                   |              |                   |
| 7       | shoulder        | epithelioid          | A                  | c.2057-2 A>G | p.Met687Glufs*28 | n.a.                              | +            |                   |
|         |                 |                      | B                  | wt           |                  |                                   |              |                   |
| III-2   | 8 <sup>3</sup>  | lower arm            | MELTUMP            | A            | c.2057-2 A>G     | p.Met687Glufs*28                  | +            | +                 |
|         |                 |                      |                    | B            | loss             |                                   |              |                   |
| 9       | ear             | epithelioid          | A                  | c.2057-2 A>G | p.Met687Glufs*28 | n.a.                              | +            |                   |
|         |                 |                      | B                  | loss/UPD     |                  |                                   |              |                   |
| II-3    | 10              | lower back           | epithelioid        | A            | c.2057-2 A>G     | p.Met687Glufs*28                  | n.a.         | wt                |
|         |                 |                      |                    | B            | wt               |                                   |              |                   |
| 11      | lower leg       | combined             | A                  | c.2057-2 A>G | p.Met687Glufs*28 | n.a.                              | wt           |                   |
|         |                 |                      | B                  | wt           |                  |                                   |              |                   |
| 12      | lower back      | epithelioid          | A                  | c.2057-2A>G  | p.Met687Glufs*28 | n.a.                              | +            |                   |
|         |                 |                      | B                  | wt           |                  |                                   |              |                   |
| 13      | upper arm       | MELTUMP              | A                  | c.2057-2A>G  | p.Met687Glufs*28 | n.a.                              | +            |                   |
|         |                 |                      | B                  | loss/UPD     |                  |                                   |              |                   |
| 14      | upper back      | cutaneous melanoma   | A                  | c.2057-2A>G  | p.Met687Glufs*28 | n.a.                              | wt           |                   |
|         |                 |                      | B                  | loss/UPD     |                  |                                   |              |                   |
| II-6    | 15              | dorsum of the foot   | cutaneous melanoma | A            | c.2057-2 A>G     | p.Met687Glufs*28                  | -            | +                 |
|         |                 |                      |                    | B            | wt               |                                   |              |                   |
| 16      | inguinal        | lymphnode metastasis | A                  | c.2057-2 A>G | p.Met687Glufs*28 | +                                 | +            |                   |
|         |                 |                      | B                  | wt           |                  |                                   |              |                   |
| II-1    | 17 <sup>4</sup> | eye                  | uveal melanoma     | A            | c.2057-2 A>G     | p.Met687Glufs*28                  | +            | wt                |
|         |                 |                      |                    | B            | loss             |                                   |              |                   |

wt: wild type; n.a.: not available; epithelioid: melanocytic tumor composed of epithelioid cells; combined: melanocytic tumor composed predominately of epithelioid cells and some admixed nevoid cells; MELTUMP: melanocytic tumor of uncertain malignant potential; UPD: uniparental disomy of maternal sequences, as assessed by markedly suppressed residual wild type sequences in the electropherograms, but no loss of 3p21 in aCGH; UPD/loss: analysis of the electropherograms indicates a loss of the wild type allele, but differentiation between UPD and loss of 3p21 was not possible, because aCGH was not performed; +: loss of the 3p21 region or *BRAF* V600E mutation; -: no loss of 3p21; <sup>1</sup>tumor is shown in **Fig. 3a-d**; <sup>2</sup>tumor is shown in **Supplementary Figure 6d-f**; <sup>3</sup>tumor is shown in **Supplementary Figure 8**; <sup>4</sup>harbors a GNAQ mutation (c.625C>A, p.Gln209Lys).



**Supplementary Table 4: Somatic mutations of *BAP1* in common acquired melanocytic nevi.**

| #  | Sex | Age | Localization | Diagnosis                   | <i>BAP1</i> Mutation | Predicted functional consequences | <i>BRAF</i> V600E |
|----|-----|-----|--------------|-----------------------------|----------------------|-----------------------------------|-------------------|
| 1  | M   | 33  | upper back   | common nevus, dermal        | wt                   | -                                 | +                 |
| 2  | F   | 61  | cheek        | common nevus, dermal        | wt                   | -                                 | +                 |
| 3  | F   | 32  | upper back   | common nevus, dermal        | wt                   | -                                 | +                 |
| 4  | F   | 32  | upper back   | common nevus, dermal        | wt                   | -                                 | +                 |
| 5  | F   | 44  | neck         | common nevus, dermal        | wt                   | -                                 | +                 |
| 6  | F   | 58  | upper back   | common nevus, dermal        | wt                   | -                                 | +                 |
| 7  | M   | 44  | chest        | common nevus, dermal        | wt                   | -                                 | +                 |
| 8  | F   | 69  | shoulder     | common nevus, mainly dermal | wt                   | -                                 | +                 |
| 9  | F   | 69  | shoulder     | common nevus, mainly dermal | wt                   | -                                 | +                 |
| 10 | F   | 46  | axilla       | common nevus, mainly dermal | wt                   | -                                 | +                 |
| 11 | M   | 25  | back         | common nevus, mainly dermal | wt                   | -                                 | +                 |
| 12 | F   | 21  | flank        | common nevus, mainly dermal | wt                   | -                                 | +                 |
| 13 | F   | 46  | flank        | common nevus, mainly dermal | wt                   | -                                 | +                 |
| 14 | M   | 43  | neck         | common nevus, mainly dermal | wt                   | -                                 | +                 |
| 15 | M   | 43  | neck         | common nevus, mainly dermal | wt                   | -                                 | +                 |
| 16 | F   | 42  | back         | common nevus, mainly dermal | wt                   | -                                 | +                 |
| 17 | F   | 19  | back         | common nevus, mainly dermal | wt                   | -                                 | +                 |
| 18 | F   | 47  | knee         | common nevus, mainly dermal | wt                   | -                                 | +                 |
| 19 | F   | 47  | neck         | common nevus, mainly dermal | wt                   | -                                 | +                 |
| 20 | F   | 39  | shoulder     | common nevus, mainly dermal | wt                   | -                                 | +                 |
| 21 | F   | 48  | back         | common nevus, mainly dermal | wt                   | -                                 | +                 |
| 22 | M   | 17  | chest        | common nevus, mainly dermal | wt                   | -                                 | +                 |
| 23 | F   | 80  | upper arm    | common nevus, mainly dermal | wt                   | -                                 | +                 |
| 24 | M   | 25  | upper back   | common nevus, mainly dermal | wt                   | -                                 | +                 |
| 25 | F   | 68  | neck         | common nevus, mainly dermal | wt                   | -                                 | +                 |
| 26 | F   | 19  | back         | common nevus, mainly dermal | wt                   | -                                 | +                 |
| 27 | M   | 25  | chest        | common nevus, mainly dermal | wt                   | -                                 | +                 |
| 28 | F   | 34  | axilla       | common nevus, mainly dermal | wt                   | -                                 | +                 |
| 29 | F   | 34  | belly        | common nevus, mainly dermal | wt                   | -                                 | +                 |

wt: wild type

**Supplementary Table 5: Somatic mutations of *BAP1* in Spitz nevi.**

| #  | Sex | Age | Localization   | Diagnosis             | <i>BAP1</i> Mutation | Predicted functional consequences | <i>BRAF</i> V600E |
|----|-----|-----|----------------|-----------------------|----------------------|-----------------------------------|-------------------|
| 1  | M   | 29  | upper arm      | Spitz nevus, dermal   | wt                   | -                                 | wt                |
| 2  | F   | 6   | nose           | Spitz nevus, dermal   | wt                   | -                                 | wt                |
| 3  | M   | 34  | neck           | Spitz nevus, dermal   | wt                   | -                                 | wt                |
| 4  | M   | 12  | cheek          | Spitz nevus, dermal   | wt                   | -                                 | wt                |
| 5  | M   | 14  | ear            | Spitz nevus, dermal   | wt                   | -                                 | wt                |
| 6  | M   | 18  | upper back     | Spitz nevus, dermal   | wt                   | -                                 | wt                |
| 7  | M   | 22  | lower leg      | Spitz nevus, dermal   | wt                   | -                                 | wt                |
| 8  | M   | 7   | neck           | Spitz nevus, dermal   | wt                   | -                                 | wt                |
| 9  | F   | 22  | chin           | Spitz nevus, compound | wt                   | -                                 | wt                |
| 10 | M   | 8   | hip            | Spitz nevus, compound | wt                   | -                                 | wt                |
| 11 | M   | 12  | knee           | Spitz nevus, compound | wt                   | -                                 | wt                |
| 12 | F   | 27  | rima ani       | Spitz nevus, compound | wt                   | -                                 | wt                |
| 13 | M   | 12  | retroauricular | Spitz nevus, compound | wt                   | -                                 | wt                |
| 14 | F   | 7   | cheek          | Spitz nevus, compound | wt                   | -                                 | wt                |
| 15 | F   | 33  | upper back     | Spitz nevus, compound | wt                   | -                                 | wt                |
| 16 | F   | 74  | axilla         | Spitz nevus, compound | wt                   | -                                 | wt                |
| 17 | F   | 31  | ankle          | Spitz nevus, compound | wt                   | -                                 | wt                |

wt: wild type

**Supplementary Table 6: Somatic mutations of *BAP1* in atypical Spitz tumors.**

| #  | Sex | Age | Localization  | Diagnosis             | <i>BAP1</i> Mutation | Predicted functional consequences | <i>BRAF</i> V600E |
|----|-----|-----|---------------|-----------------------|----------------------|-----------------------------------|-------------------|
| 1  | F   | 44  | upper back    | Spitz tumor, atypical | c.178C>T             | p.(Arg60*)                        | +                 |
| 2  | M   | 13  | upper back    | Spitz tumor, atypical | c.1768C>T            | p.(Gln590*)                       | +                 |
| 3  | M   | 4   | thigh         | Spitz tumor, atypical | wt                   | -                                 | wt                |
| 4  | M   | 38  | upper arm     | Spitz tumor, atypical | wt                   | -                                 | wt                |
| 5  | F   | 13  | lower leg     | Spitz tumor, atypical | wt                   | -                                 | wt                |
| 6  | M   | 49  | lower back    | Spitz tumor, atypical | wt                   | -                                 | wt                |
| 7  | M   | 2   | chin          | Spitz tumor, atypical | wt                   | -                                 | wt                |
| 8  | M   | 52  | left shoulder | Spitz tumor, atypical | wt                   | -                                 | wt                |
| 9  | F   | 16  | back          | Spitz tumor, atypical | wt                   | -                                 | wt                |
| 10 | F   | 21  | cheek         | Spitz tumor, atypical | wt                   | -                                 | wt                |
| 11 | M   | 4   | right foot    | Spitz tumor, atypical | wt                   | -                                 | wt                |
| 12 | F   | 37  | head          | Spitz tumor, atypical | wt                   | -                                 | +                 |
| 13 | F   | 19  | thigh         | Spitz tumor, atypical | wt                   | -                                 | wt                |
| 14 | F   | 45  | lower back    | Spitz tumor, atypical | wt                   | -                                 | wt                |
| 15 | F   | 42  | thigh         | Spitz tumor, atypical | wt                   | -                                 | wt                |
| 16 | F   | 14  | n.a.          | Spitz tumor, atypical | wt                   | -                                 | wt                |
| 17 | M   | 26  | knee          | Spitz tumor, atypical | wt                   | -                                 | wt                |
| 18 | F   | 46  | lower leg     | Spitz tumor, atypical | wt                   | -                                 | wt                |

wt: wild type; n.a.: not available

**Supplementary Table 7: Somatic mutations of *BAP1* in sporadic cutaneous melanomas.**

| #  | Sex  | Age  | Group | Localization  | <i>BAP1</i> Mutation   | Predicted functional consequences |
|----|------|------|-------|---------------|------------------------|-----------------------------------|
| 1  | M    | 60   | NCS   | arm           | c.999_1046del          | p.Val335Profs*10                  |
| 2  | F    | 51   | NCS   | upper back    | c.278_281del           | p.Thr93Metfs*4                    |
| 3  | M    | 84   | NCS   | leg           | wt                     | -                                 |
| 4  | M    | 76   | NCS   | chest         | wt                     | -                                 |
| 5  | F    | 60   | NCS   | foot          | wt                     | -                                 |
| 6  | F    | 36   | NCS   | n.a.          | wt                     | -                                 |
| 7  | F    | 54   | NCS   | arm           | wt                     | -                                 |
| 8  | M    | 57   | NCS   | back          | wt                     | -                                 |
| 9  | n.a. | n.a. | NCS   | n.a.          | wt                     | -                                 |
| 10 | M    | 58   | NCS   | chest         | wt                     | -                                 |
| 11 | M    | 63   | NCS   | back          | wt                     | -                                 |
| 12 | M    | 27   | NCS   | temple        | wt                     | -                                 |
| 13 | M    | 52   | NCS   | chest         | wt                     | -                                 |
| 14 | M    | 62   | NCS   | back          | wt                     | -                                 |
| 15 | F    | 70   | NCS   | arm           | wt                     | -                                 |
| 16 | M    | 77   | CSD   | scalp         | wt                     | -                                 |
| 17 | M    | 61   | CSD   | cheek         | wt                     | -                                 |
| 18 | F    | 83   | CSD   | ear           | wt                     | -                                 |
| 19 | F    | 62   | CSD   | head          | wt                     | -                                 |
| 20 | F    | 71   | CSD   | eyelid        | wt                     | -                                 |
| 21 | M    | 61   | CSD   | scalp         | wt                     | -                                 |
| 22 | F    | 61   | CSD   | scalp         | wt                     | -                                 |
| 23 | M    | 64   | CSD   | cheek         | wt                     | -                                 |
| 24 | M    | 42   | CSD   | temple        | wt                     | -                                 |
| 25 | F    | n.a. | CSD   | neck          | wt                     | -                                 |
| 26 | M    | 73   | CSD   | neck          | wt                     | -                                 |
| 27 | n.a. | n.a. | CSD   | neck          | wt                     | -                                 |
| 28 | M    | 67   | CSD   | ear           | wt                     | -                                 |
| 29 | F    | 55   | CSD   | cheek         | wt                     | -                                 |
| 30 | F    | 67   | CSD   | cheek right   | wt                     | -                                 |
| 31 | n.a. | 71   | AM    | foot, plantar | c.2090C>G <sup>1</sup> | p.Ser697Cys <sup>1</sup>          |
| 32 | n.a. | n.a. | AM    | foot, plantar | wt                     | -                                 |
| 33 | n.a. | 58   | AM    | foot, plantar | wt                     | -                                 |
| 34 | M    | 40   | AM    | foot, plantar | wt                     | -                                 |
| 35 | F    | 50   | AM    | foot, plantar | wt                     | -                                 |
| 36 | F    | 53   | AM    | hand, palmar  | wt                     | -                                 |
| 37 | M    | 55   | AM    | foot, plantar | wt                     | -                                 |
| 38 | F    | 63   | AM    | foot, plantar | wt                     | -                                 |
| 39 | M    | 42   | AM    | foot, plantar | wt                     | -                                 |
| 40 | M    | 66   | AM    | foot, plantar | wt                     | -                                 |

**Supplementary Table 7 (continued).**

| #  | Sex  | Age  | Group | Localization  | <i>BAP1</i> Mutation | Predicted functional consequences |
|----|------|------|-------|---------------|----------------------|-----------------------------------|
| 41 | M    | 52   | AM    | foot, plantar | wt                   | -                                 |
| 42 | n.a. | n.a. | AM    | hand, palmar  | wt                   | -                                 |
| 43 | F    | 67   | AM    | hand, palmar  | wt                   | -                                 |
| 44 | n.a. | n.a. | AM    | foot, plantar | wt                   | -                                 |
| 45 | n.a. | n.a. | AM    | foot, plantar | wt                   | -                                 |
| 46 | M    | 69   | MM    | glans penis   | wt                   | -                                 |
| 47 | F    | 51   | MM    | vagina        | wt                   | -                                 |
| 48 | F    | 66   | MM    | anus          | wt                   | -                                 |
| 49 | M    | 31   | MM    | oral          | wt                   | -                                 |
| 50 | M    | 66   | MM    | anus          | wt                   | -                                 |
| 51 | F    | 70   | MM    | bladder       | wt                   | -                                 |
| 52 | F    | 70   | MM    | Anorectal     | wt                   | -                                 |
| 53 | F    | 46   | MM    | n.a.          | wt                   | -                                 |
| 54 | F    | 62   | MM    | vulva         | wt                   | -                                 |
| 55 | M    | 72   | MM    | oral          | wt                   | -                                 |
| 56 | F    | 66   | MM    | vulva         | wt                   | -                                 |
| 57 | F    | 56   | MM    | vagina        | wt                   | -                                 |
| 58 | n.a. | n.a. | MM    | rectal        | wt                   | -                                 |
| 59 | F    | n.a. | MM    | n.a.          | wt                   | -                                 |
| 60 | M    | 58   | MM    | rectal        | wt                   | -                                 |

wt: wild type; n.a.: not available.

NCSD: Melanoma on skin without chronic sun-induced damage

CSD: Melanoma on skin with chronic sun-induced damage

AM: Acral Melanoma

MM: Mucosal Melanoma

<sup>1</sup>Mutation affects the "Interaction with BRCA1" domain and its functional consequence was assessed with computational functional significance predictors: MutationAssessor: medium impact; PolyPhen: possibly damaging; SIFT: not scored. Mutated amino acid is conserved at least back to Zebrafish.

**Supplementary Table 8: Somatic mutations of *BAP1* in primary uveal melanomas.**

| #  | Sex | Age  | <i>BAP1</i> mutations                 | Predicted functional                      | Chromosomal changes (aCGH) |         |         |         | GNAQ/GNA11 status |
|----|-----|------|---------------------------------------|-------------------------------------------|----------------------------|---------|---------|---------|-------------------|
|    |     |      |                                       |                                           | loss 3                     | loss 1p | loss 6q | gain 8q |                   |
| 1  | F   | 69   | c.1153C>T                             | p.Arg385*                                 | +                          | +       | -       | +       | GNAQ Q209P        |
| 2  | F   | n.a. | c.219del                              | p.Asp73Glufs*5                            | +                          | +       | -       | +       | GNA11 Q209L       |
| 3  | M   | 75   | c.58G>T                               | p.Glu20*                                  | +                          | +       | +       | -       | GNA11 Q209L       |
| 4  | M   | 53   | c.643del                              | p.Glu212Serfs*1                           | +                          | -       | -       | +       | GNAQ Q209L        |
| 5  | F   | 79   | c.915dup                              | p.Glu306*                                 | +                          | -       | -       | +       | GNA11 Q209L       |
| 6  | M   | 82   | c.812_821del                          | p.Ile271Thrfs*61                          | +                          | -       | -       | +       | GNAQ Q209P        |
| 7  | M   | 64   | c.226_239del                          | p.Ile76Valfs*45                           | +                          | +       | -       | -       | GNA11 Q209L       |
| 8  | M   | 48   | c.6dup                                | p.Lys3*                                   | +                          | -       | -       | +       | GNA11 Q209L       |
| 9  | M   | 73   | c.993del                              | p.Lys331Asnfs*4                           | +                          | +       | +       | +       | GNAQ Q209P        |
| 10 | M   | 49   | c.243C>A <sup>1</sup>                 | p.Phe81Leu <sup>1</sup>                   | +                          | -       | -       | +       | GNAQ Q209P        |
| 11 | F   | 84   | c.172_179del<br>c.139A>T <sup>1</sup> | p.Ser58Lysfs*8<br>p.Ile47Phe <sup>2</sup> | +                          | -       | +       | +       | GNAQ Q209P        |
| 12 | M   | 63   | c.188C>G <sup>1</sup>                 | p.Ser63Cys <sup>3</sup>                   | +                          | -       | +       | +       | GNA11 Q209L       |
| 13 | F   | 83   | wt                                    | wt                                        | +                          | +       | -       | -       | GNAQ Q209P        |
| 14 | F   | 88   | wt                                    | wt                                        | +                          | -       | -       | +       | GNAQ Q209P        |
| 15 | F   | 78   | wt                                    | wt                                        | +                          | -       | +       | +       | GNA11 Q209L       |
| 16 | F   | 86   | wt                                    | wt                                        | p. +                       | +       | +       | +       | wt                |
| 17 | F   | 79   | c.1379C>G                             | p.Ser460*                                 | p. +                       | -       | -       | +       | GNAQ Q209P        |
| 18 | F   | n.a. | wt                                    | wt                                        | p. +                       | -       | -       | +       | GNA11 Q209L       |
| 19 | M   | 77   | wt                                    | wt                                        | p. +                       | -       | +       | -       | GNAQ Q209P        |
| 20 | M   | 78   | wt                                    | wt                                        | p. +                       | +       | +       | +       | GNAQ Q209P        |
| 21 | M   | 80   | wt                                    | wt                                        | p. +                       | -       | -       | -       | GNAQ Q209P        |
| 22 | M   | 43   | wt                                    | wt                                        | -                          | -       | -       | -       | GNAQ Q209P        |
| 23 | M   | 88   | wt                                    | wt                                        | -                          | -       | -       | -       | GNA11 Q209L       |
| 24 | M   | 81   | wt                                    | wt                                        | -                          | -       | -       | -       | wt                |
| 25 | M   | 51   | wt                                    | wt                                        | -                          | -       | -       | +       | GNA11 Q209L       |
| 26 | F   | 55   | wt                                    | wt                                        | -                          | -       | -       | -       | GNAQ Q209P        |
| 27 | F   | 23   | wt                                    | wt                                        | -                          | -       | -       | +       | GNAQ Q209P        |
| 28 | F   | 52   | wt                                    | wt                                        | -                          | +       | -       | -       | GNAQ Q209P        |
| 29 | M   | 82   | wt                                    | wt                                        | -                          | -       | -       | +       | GNA11 Q209L       |
| 30 | M   | 66   | wt                                    | wt                                        | -                          | -       | -       | -       | GNAQ Q209R        |
| 31 | M   | 66   | wt                                    | wt                                        | -                          | -       | -       | -       | GNAQ Q209L        |
| 32 | M   | 39   | wt                                    | wt                                        | -                          | +       | +       | +       | GNAQ Q209P        |
| 33 | F   | 46   | c.1002A>G                             | p.(=)                                     | -                          | -       | -       | -       | GNAQ Q209P        |

wt: wild type; n.a.: not available; chromosomal changes were detected by aCGH: '+' chromosomal aberration, 'p.+' partial loss of chromosome 3, '-' no chromosomal aberrations;<sup>1,2,3</sup>All three mutations affect the "Peptidase\_C12: Ubiquitin carboxyl-terminal hydrolase, family 1" domain; all changed amino acids are conserved at least back to Zebrafish. The functional consequences were assessed with computational functional significance predictors:

| Mutation:                  | MutationAssessor | PolyPhen          | SIFT       |
|----------------------------|------------------|-------------------|------------|
| - <sup>1</sup> p.Phe81Leu: | high impact      | probably damaging | damaging   |
| - <sup>2</sup> p.Ile47Phe: | high impact      | benign            | not scored |
| - <sup>3</sup> p.Ser63Cys: | medium impact    | possibly damaging | tolerated  |

**Supplementary Table 9: Primer for *BAP1* sequencing.**

| Exon               | Forward                | Reverse              |
|--------------------|------------------------|----------------------|
| <b>DNA primer</b>  |                        |                      |
| Exon1-2            | GGAGGGCCTGGACATGG      | ATGAGTGAGGGCGCAGG    |
| Exon3              | GGGCTGTCTTCCCTACTG     | CCTGTTCTCTGGGACCTTCC |
| Exon4              | ATTGTCTTCTCCCTTTGGC    | AACATGGCAGCATCCCAC   |
| Exon5              | GTGAGGGGTGCTGTGTATGG   | AGTTGGCTGTGAGCCAGG   |
| Exon6              | TTTGCCTTCCACCCATAGTC   | ACTCCACCCCACATCAG    |
| Exon7              | GCTGATGTGGGGTGGGAG     | GGAGGTAGGCAGAGACACCC |
| Exon8              | ACTCAGGGTTTCTTCTCGC    | TCTGTCCCTCCCAAAGTAGG |
| Exon9              | CTCAACCTGATGGCGGG      | AATGCAGGGAGGGTTGG    |
| Exon10             | CGGGTCTACCTTTCTCCTC    | AGACATTAGCGGGTGGCTC  |
| Exon11             | GGAGGTCCTGCCTGTGTTT    | GGAACCACATGGGAAAATTG |
| Exon12             | CCGAGCAGCACTTGTGTTG    | GATCCGAAGCACCTAGAACC |
| Exon13_1           | GCCCCGTTCCCTTGCTTC     | GTGAGGGCTGCGAGTGTG   |
| Exon13_2           | CCTCTCAATTCCTCTGTCCATC | GCAGGCTGTCATCCTCTCC  |
| Exon13_3           | CTATCCGCTCAGCCAACC     | TCCCTCCTCCCTCCTGG    |
| Exon14             | CCACAAAGTGCCTGCACTC    | AGCTCAGGCCTTACCCTCTG |
| Exon15             | GTGGGGCTTTGTTGCTG      | CAGTGGACCTCGGGAGAG   |
| Exon16             | AGATTGGCTCCAGTGCTCTC   | AGCAGGGCATTCCAGTTAAG |
| Exon17             | ATGAGAGCCTCAGCTCCTGG   | CACACGGCAAGAGTGGG    |
| <b>cDNA primer</b> |                        |                      |
| Exon 13-17         | ATCTGGGTCCTGTCATCAGC   | ACGGAGATGTTCTGCTCCAC |
